# Supplementary material for: Developmental GABA polarity switch and neuronal plasticity in Bioengineered Neuronal Organoids
Source: Springer Nature journal article supplement (doi:10.1038/s41467-020-17521-w), 2020-07-29
Supplement: MOESM1 [file 41467_2020_17521_MOESM1_ESM.pdf › 41467_2020_17521_MOESM1_ESM.pdf]

## Supplementary Information

### Developmental GABA polarity switch and neuronal plasticity in Bioengineered Neuronal Organoids

Zafeiriou et al.

#### Supplementary Figures

Supplementary Figure 1. Effect of variable neuronal induction duration, FGF and TGF $\beta$ 1 treatment in BENO generation.

Supplementary Figure 2. Transcript analysis of developing BENOs by qPCR from d-1 to d40 under the tested protocols.

Supplementary Figure 3. Transcriptome analysis of BENO development in the course of 2 months.

Supplementary Figure 4. WmIF analysis shows functional excitatory neurons in d40 BENOs.

Supplementary Figure 5. Myelination in BENOs.

Supplementary Figure 6. Development of neuronal networks during BENO generation.

Supplementary Figure 7. MEA monitoring of neuronal network development in d20-d57 BENOs.

Supplementary Figure 8. Parameters describing neuronal network activity in d20-d57 BENOs.

Supplementary Figure 9. Network plasticity in BENOS.

#### Supplementary Tables

Supplementary Table **1**. Detailed antibody list containing respective dilutions for WmIF.

Supplementary Table **2**. Detailed primer sequence list.

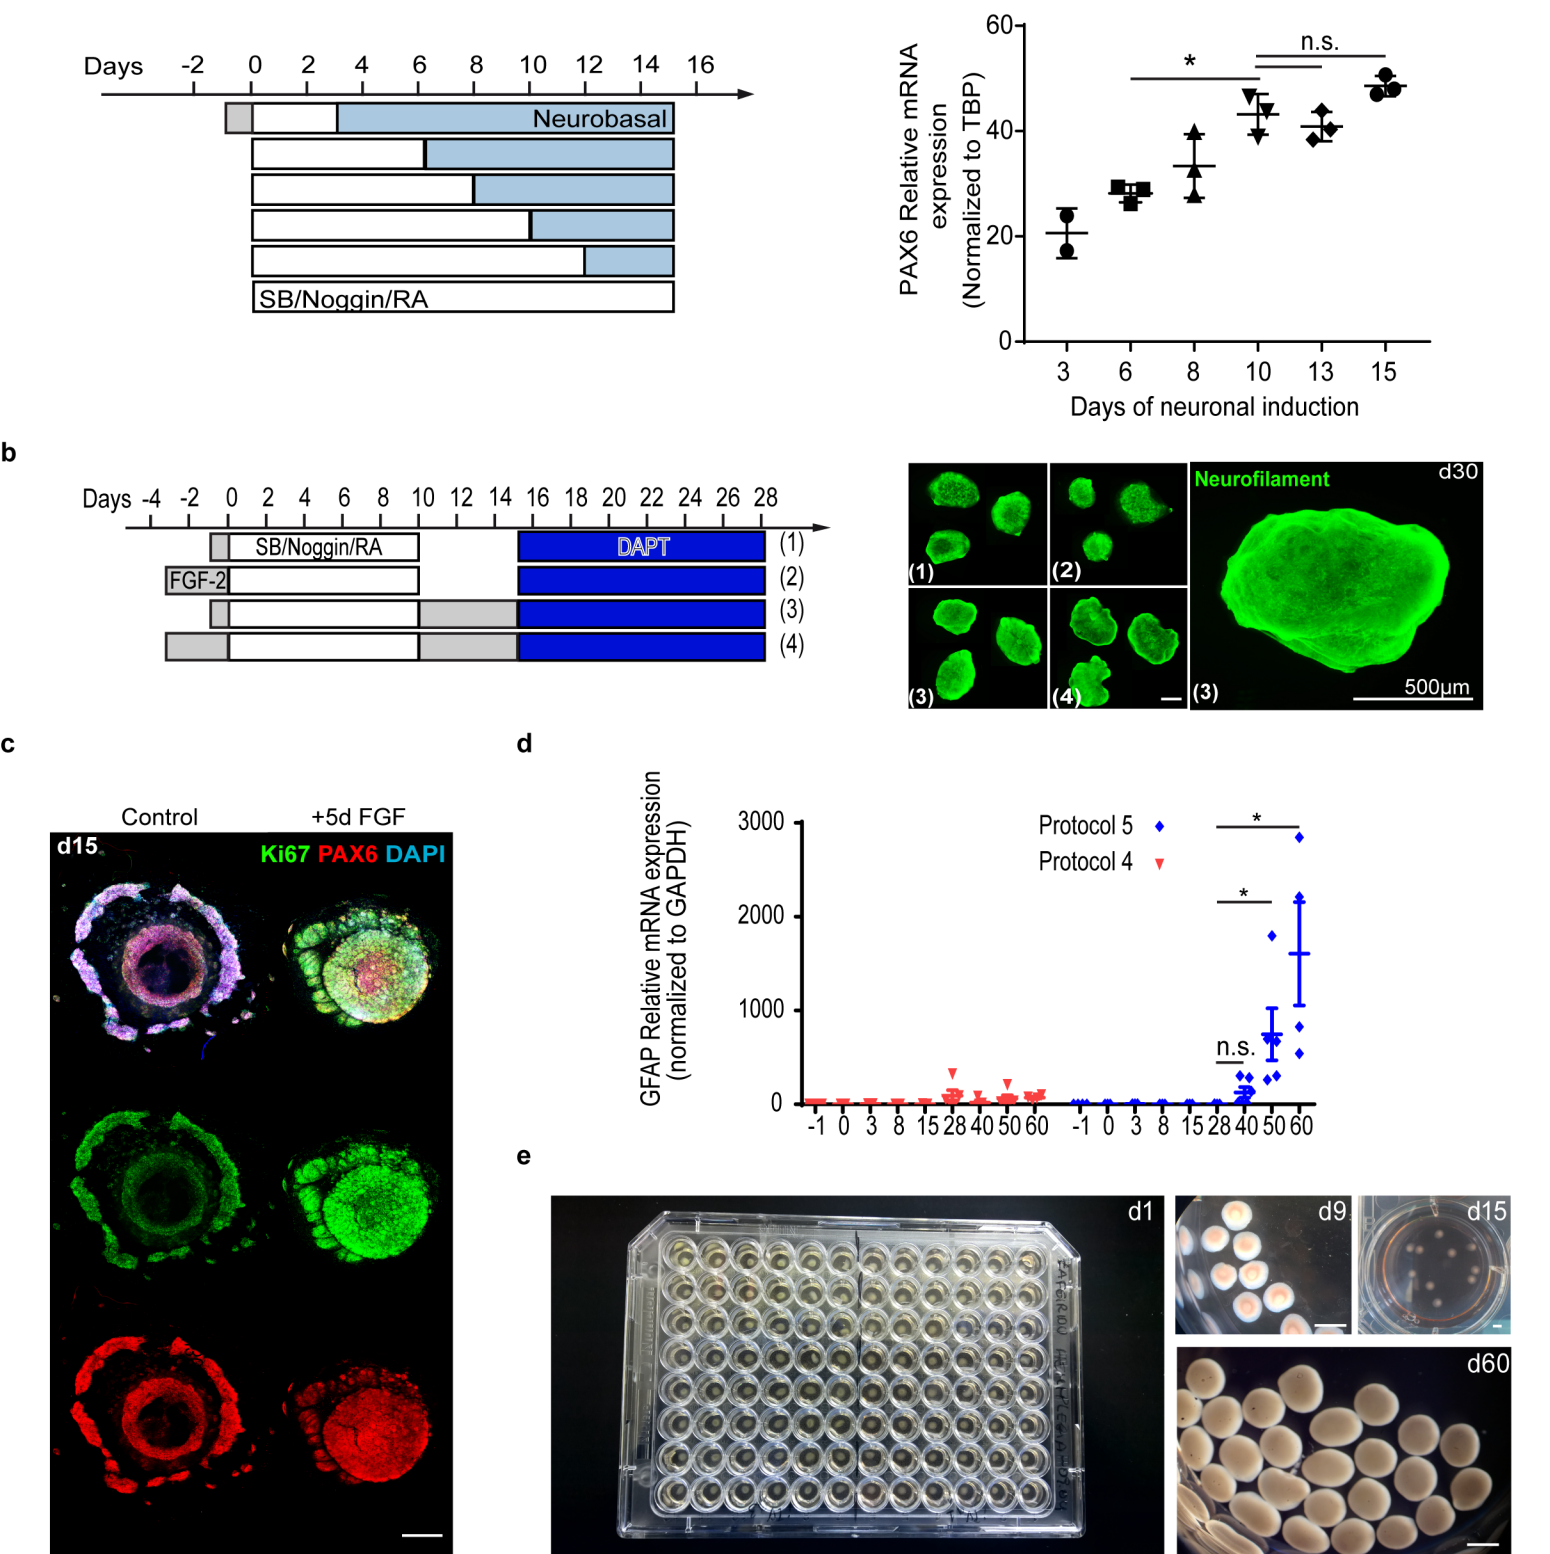

**Supplementary Fig. 1| Effect of variable neuronal induction duration, FGF and TGFβ1 treatment in BENO generation. a,** Schematic overview of the tested neuronal induction protocols and PAX6 transcript expression in the respectively derived d15 BENOs. Neuronal induction by dual SMAD inhibition (Noggin/SB) was performed for 3, 6, 8, 10 12 or 15 days. After termination of dual SMAD inhibition all BENOs were cultured until day 15 in basal medium and subjected to RNA isolation for qPCR. TATA sequence binding protein (TBP) was used as housekeeping gene; n=3 / time point. \*p<0.05, one-way ANOVA with Sidak's multiple comparisons post hoc test. **b,** Effect of FGF2 treatment on neurofilament expression in d30 BENOs. BENOs were treated with 10 ng/ml FGF2 prior neuronal commitment (cond. 2), after (cond. 3) or both (cond. 4) and compared with the untreated control (cond. 1); refer to the schematic for an overview of the differently tested conditions. Conditions 3 and 4 showed similar NF positive axons interconnecting throughout the organoid in contrast to condition 1 and 2. These data suggest that FGF2 addition after neural induction is crucial for BENO generation. **c,** Whole mount immunofluorescence (WmIF) analysis of BENOS at d15 demonstrated proliferating NPCs (PAX6pos / Ki67pos). 5 d treatment of BENOs with FGF2 after neuronal commitment clearly increased the number of proliferating NPCs and supported tissue condensation. Scale bar: 500 μm. **d,** Transcript levels of GFAP throughout BENO development with (protocol 5; Figure 1a) and without (protocol 4; Figure 1a) TGFβ1. TGFβ1 markedly enhanced gliogenesis after day 30. GAPDH was used as a housekeeping gene. n=3-5/time point, 2 Independent experiments, data are presented as mean values +/- SEM, \*p<0.05, two-way ANOVA with Sidak's multiple comparisons post hoc test. **e,** Bright field images showing the morphological homogeneity of BENOs in different days of differentiation (d1, d9, d15, d60). Scale bar: 2 mm.

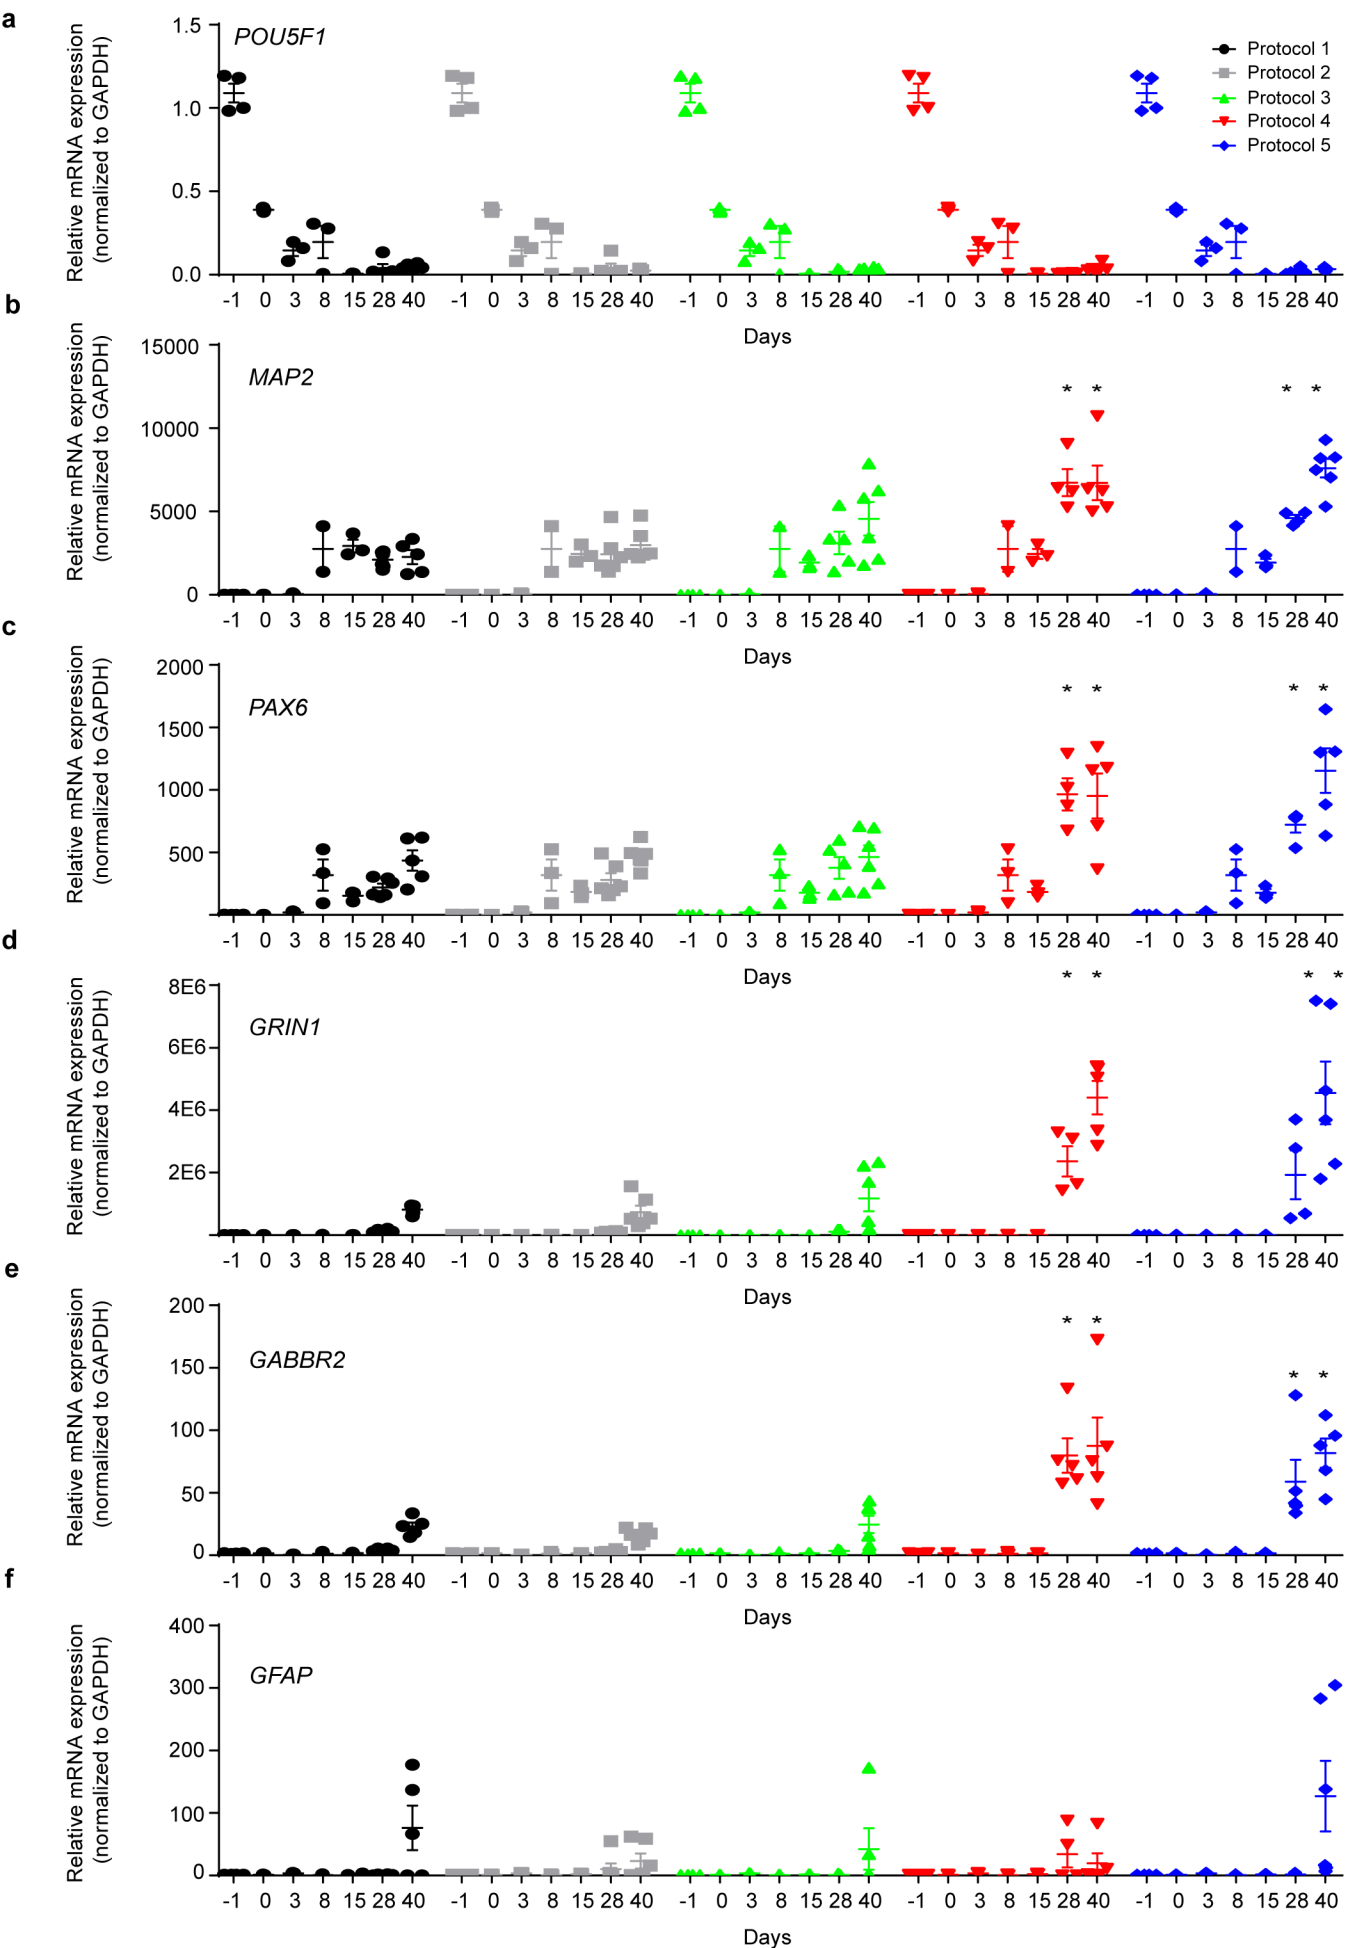

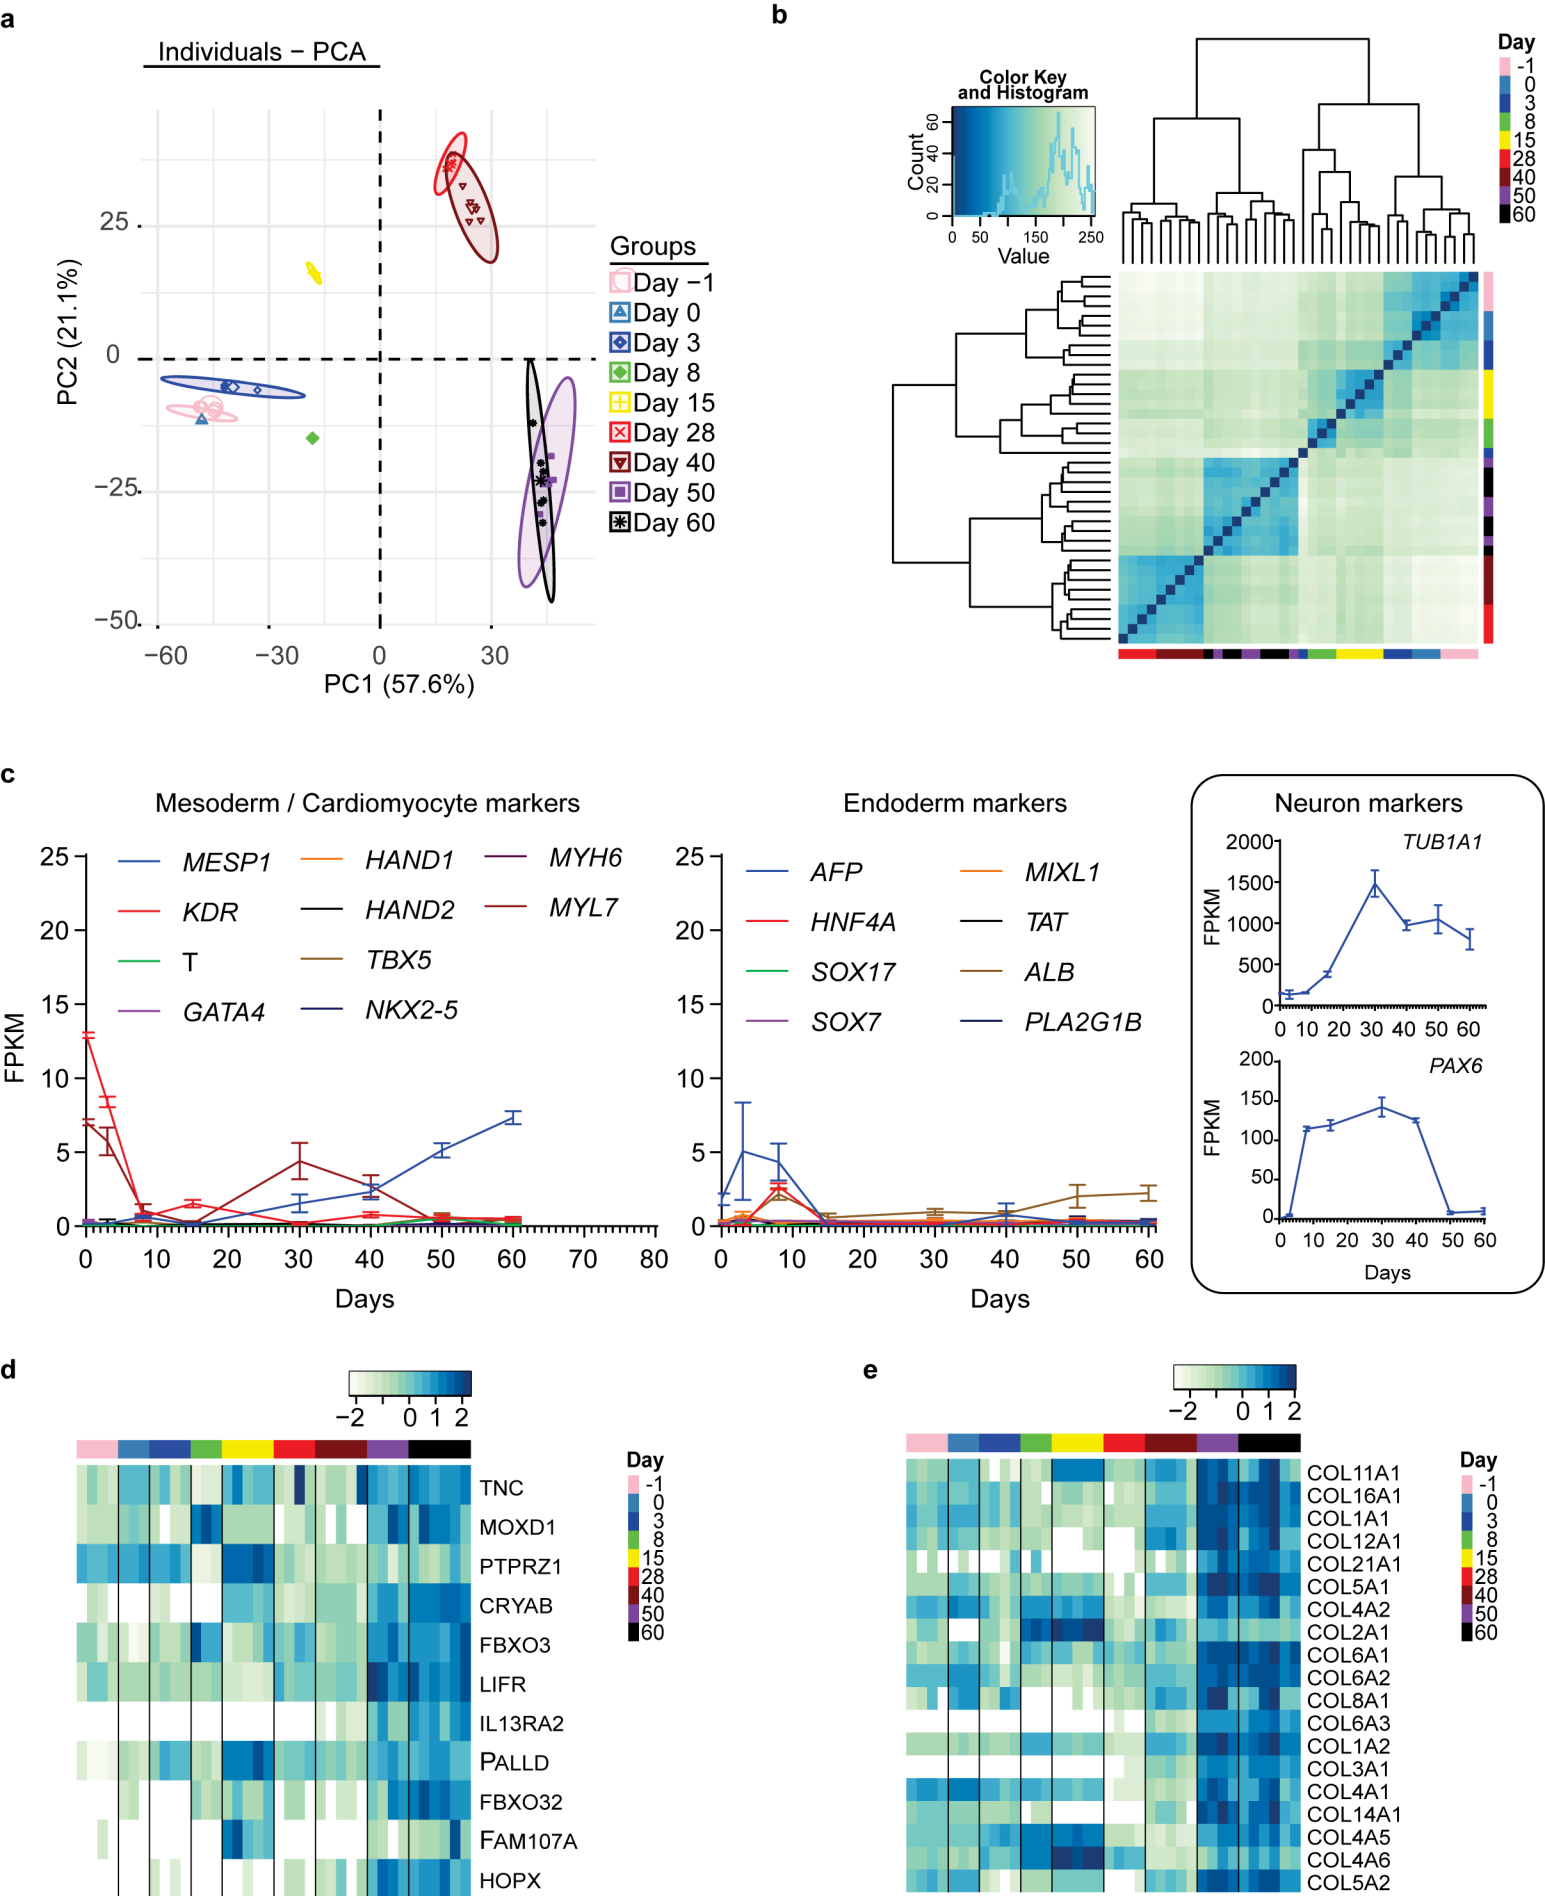

**Supplementary Fig. 3| Transcriptome analysis of BENO development in the course of 2 months.** **a**, Principal component analysis and **b**, correlation heat map showing clustering of data obtained from BENOs at: d-1, 0 and 3 (stem cell); d8 and d15 (NPC); of d28, d40 (neurogenesis); and day 50, 60 (gliogenesis). **c**, very low FPKM values for mesodermal and endodermal markers provide evidence for no or negligible contamination of BENOS with non-ectodermal lineages. Structural neuronal markers TUB1A1 as well as transcription factor PAX6 were used as reference for the neuronal component. **d**, Gene expression heat map for markers of outer radial glia during BENO development. **e**, Gene expression heat map of matrix components upregulated during gliogenesis (d50-60).



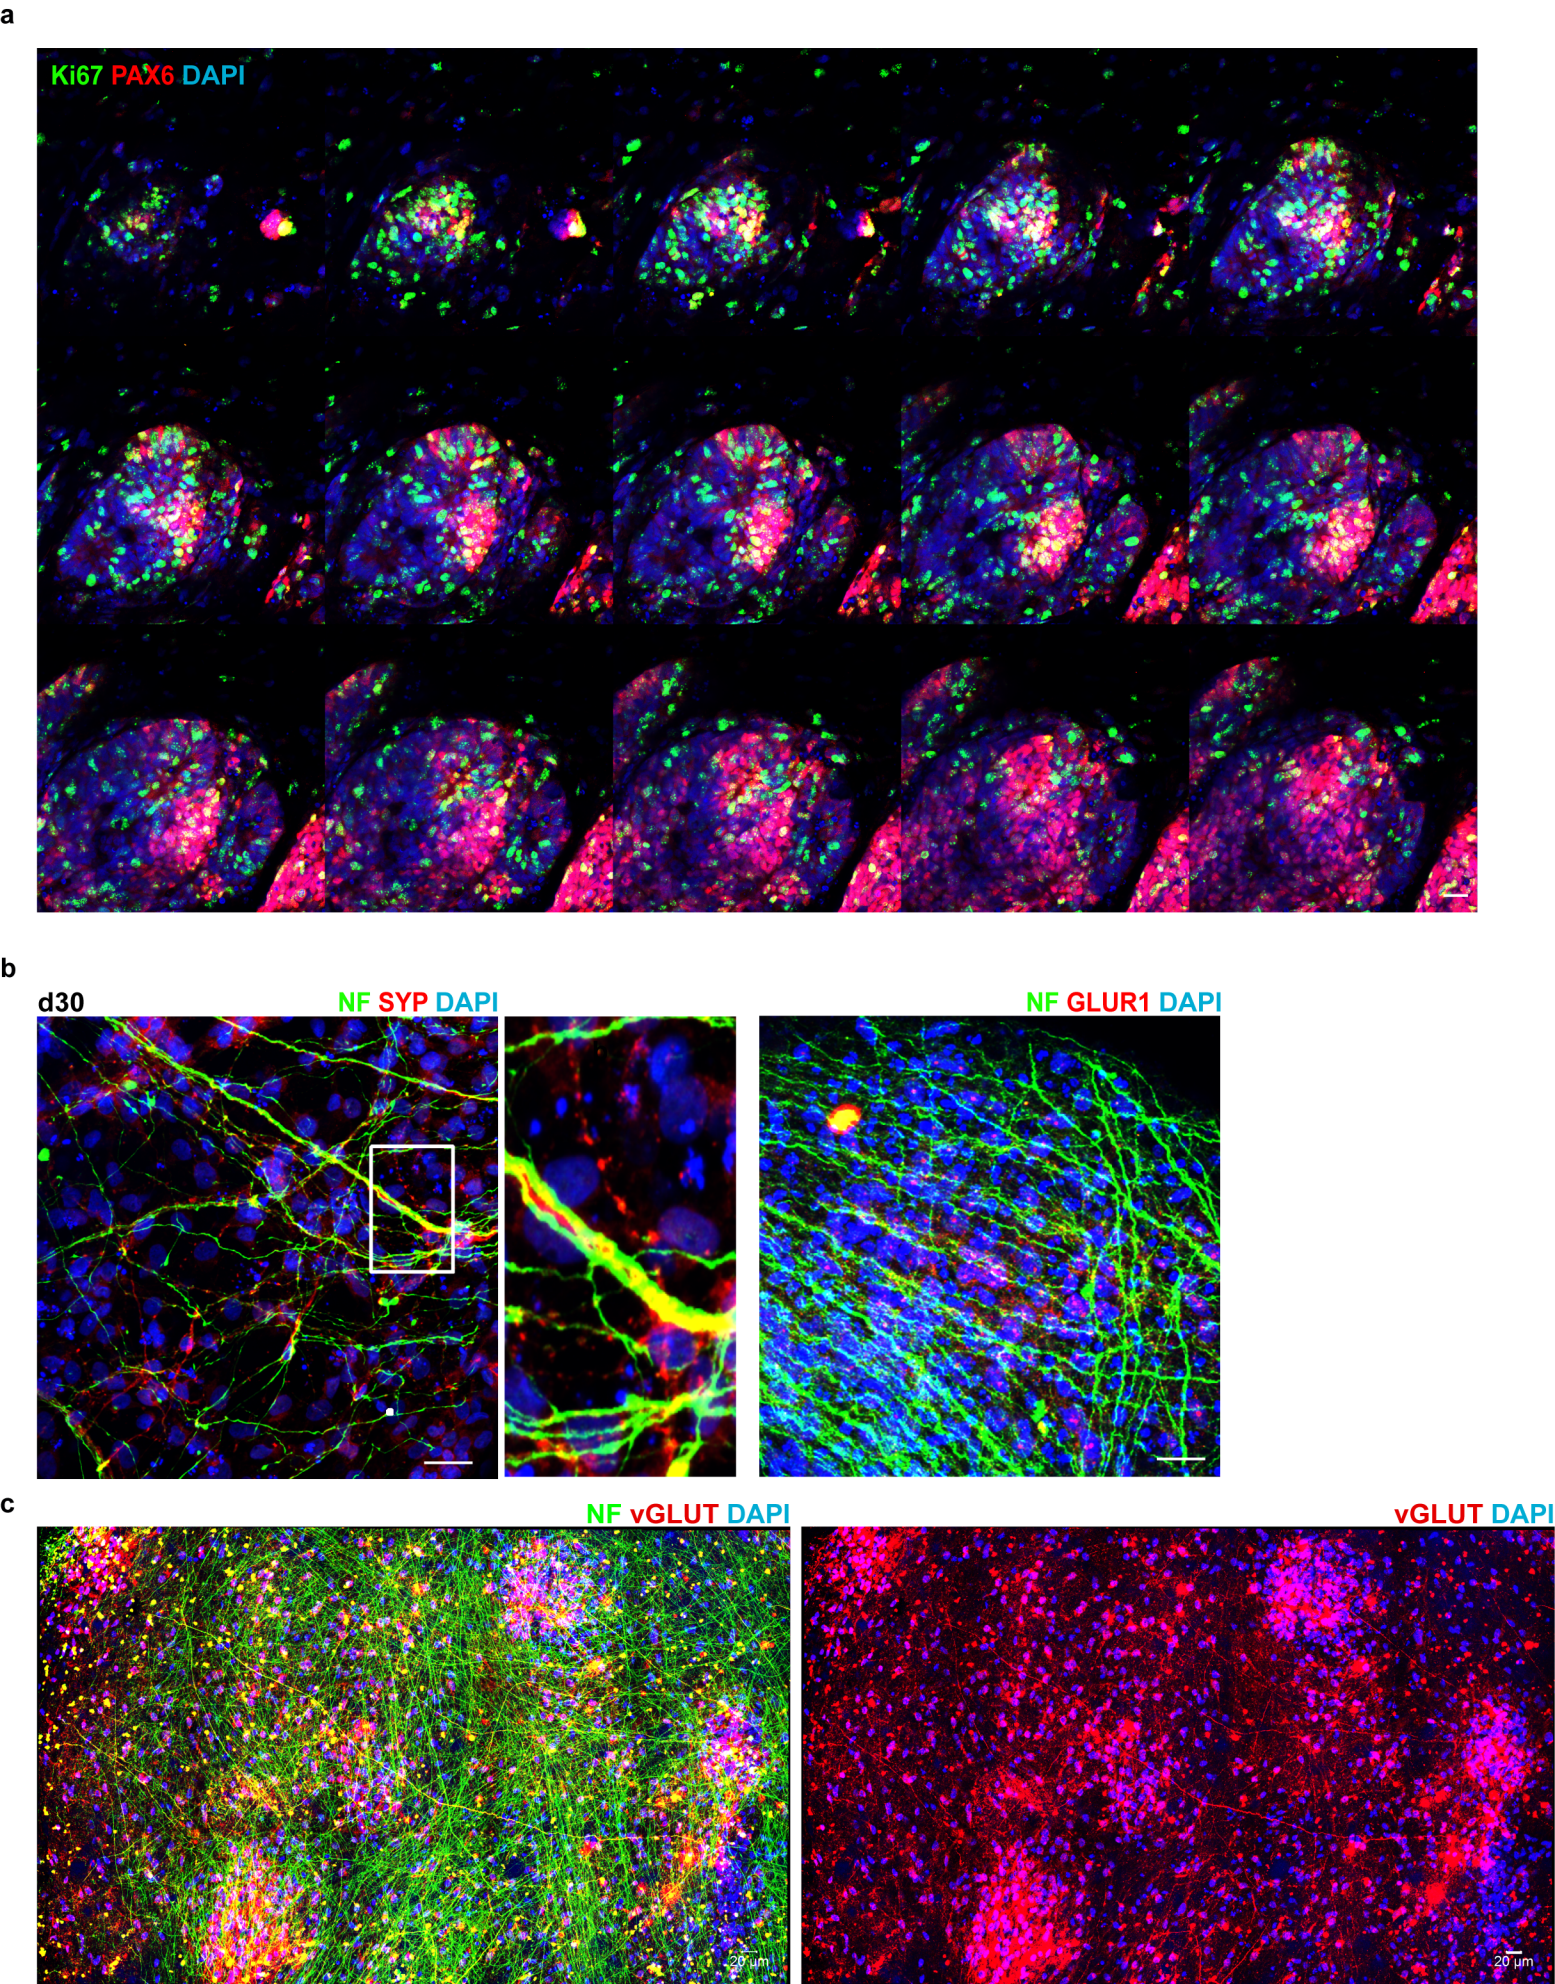

**Supplementary Fig. 4| WmIF analysis shows functional excitatory neurons in d40 BENOs.** **a**, The confocal planes of the higher magnification image depicted in Figure 3a are displayed to distinguish proliferating NPCs with nuclear PAX6 and Ki67 signals. Scale bar: 20  $\mu$ m. **b**, Prominent expression of presynaptic marker synaptophysin (SYP) and postsynaptic marker GLUR1 suggested the presence of synapses. **c**, Presynaptic marker vGlut demonstrated a high abundance of glutamatergic neurons in BENOs. The expression was localized in the somas as well as in synaptic boutons. All data presented on this figure derive from at least 3 independent experiments with similar results. Scale bar: 20  $\mu$ m.



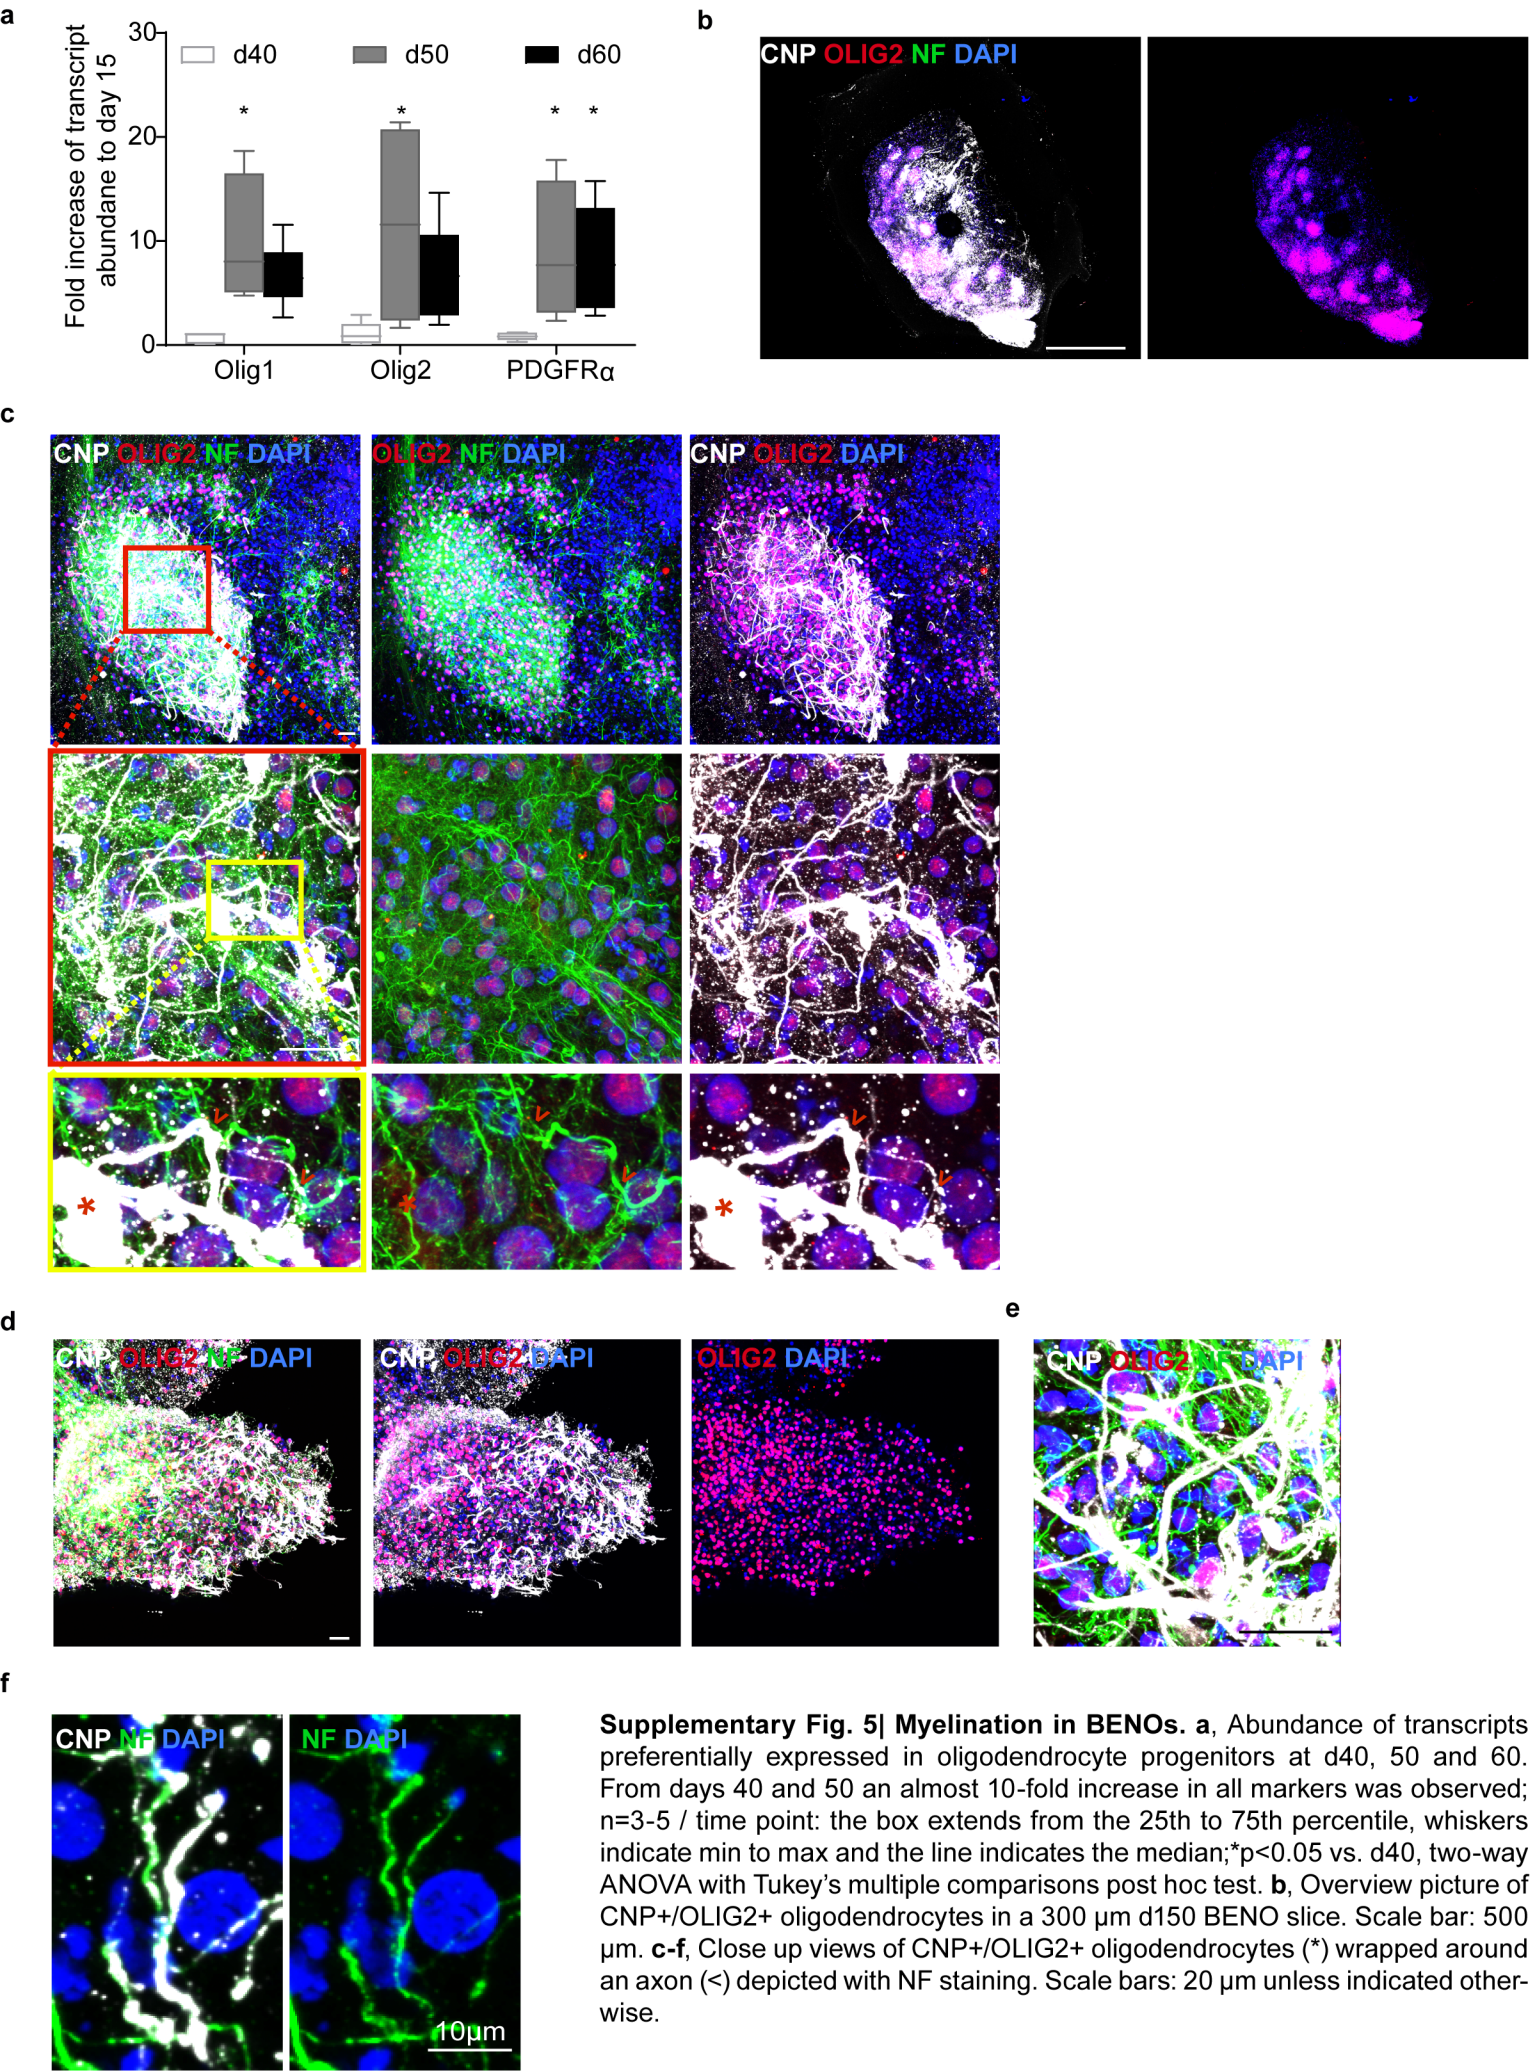

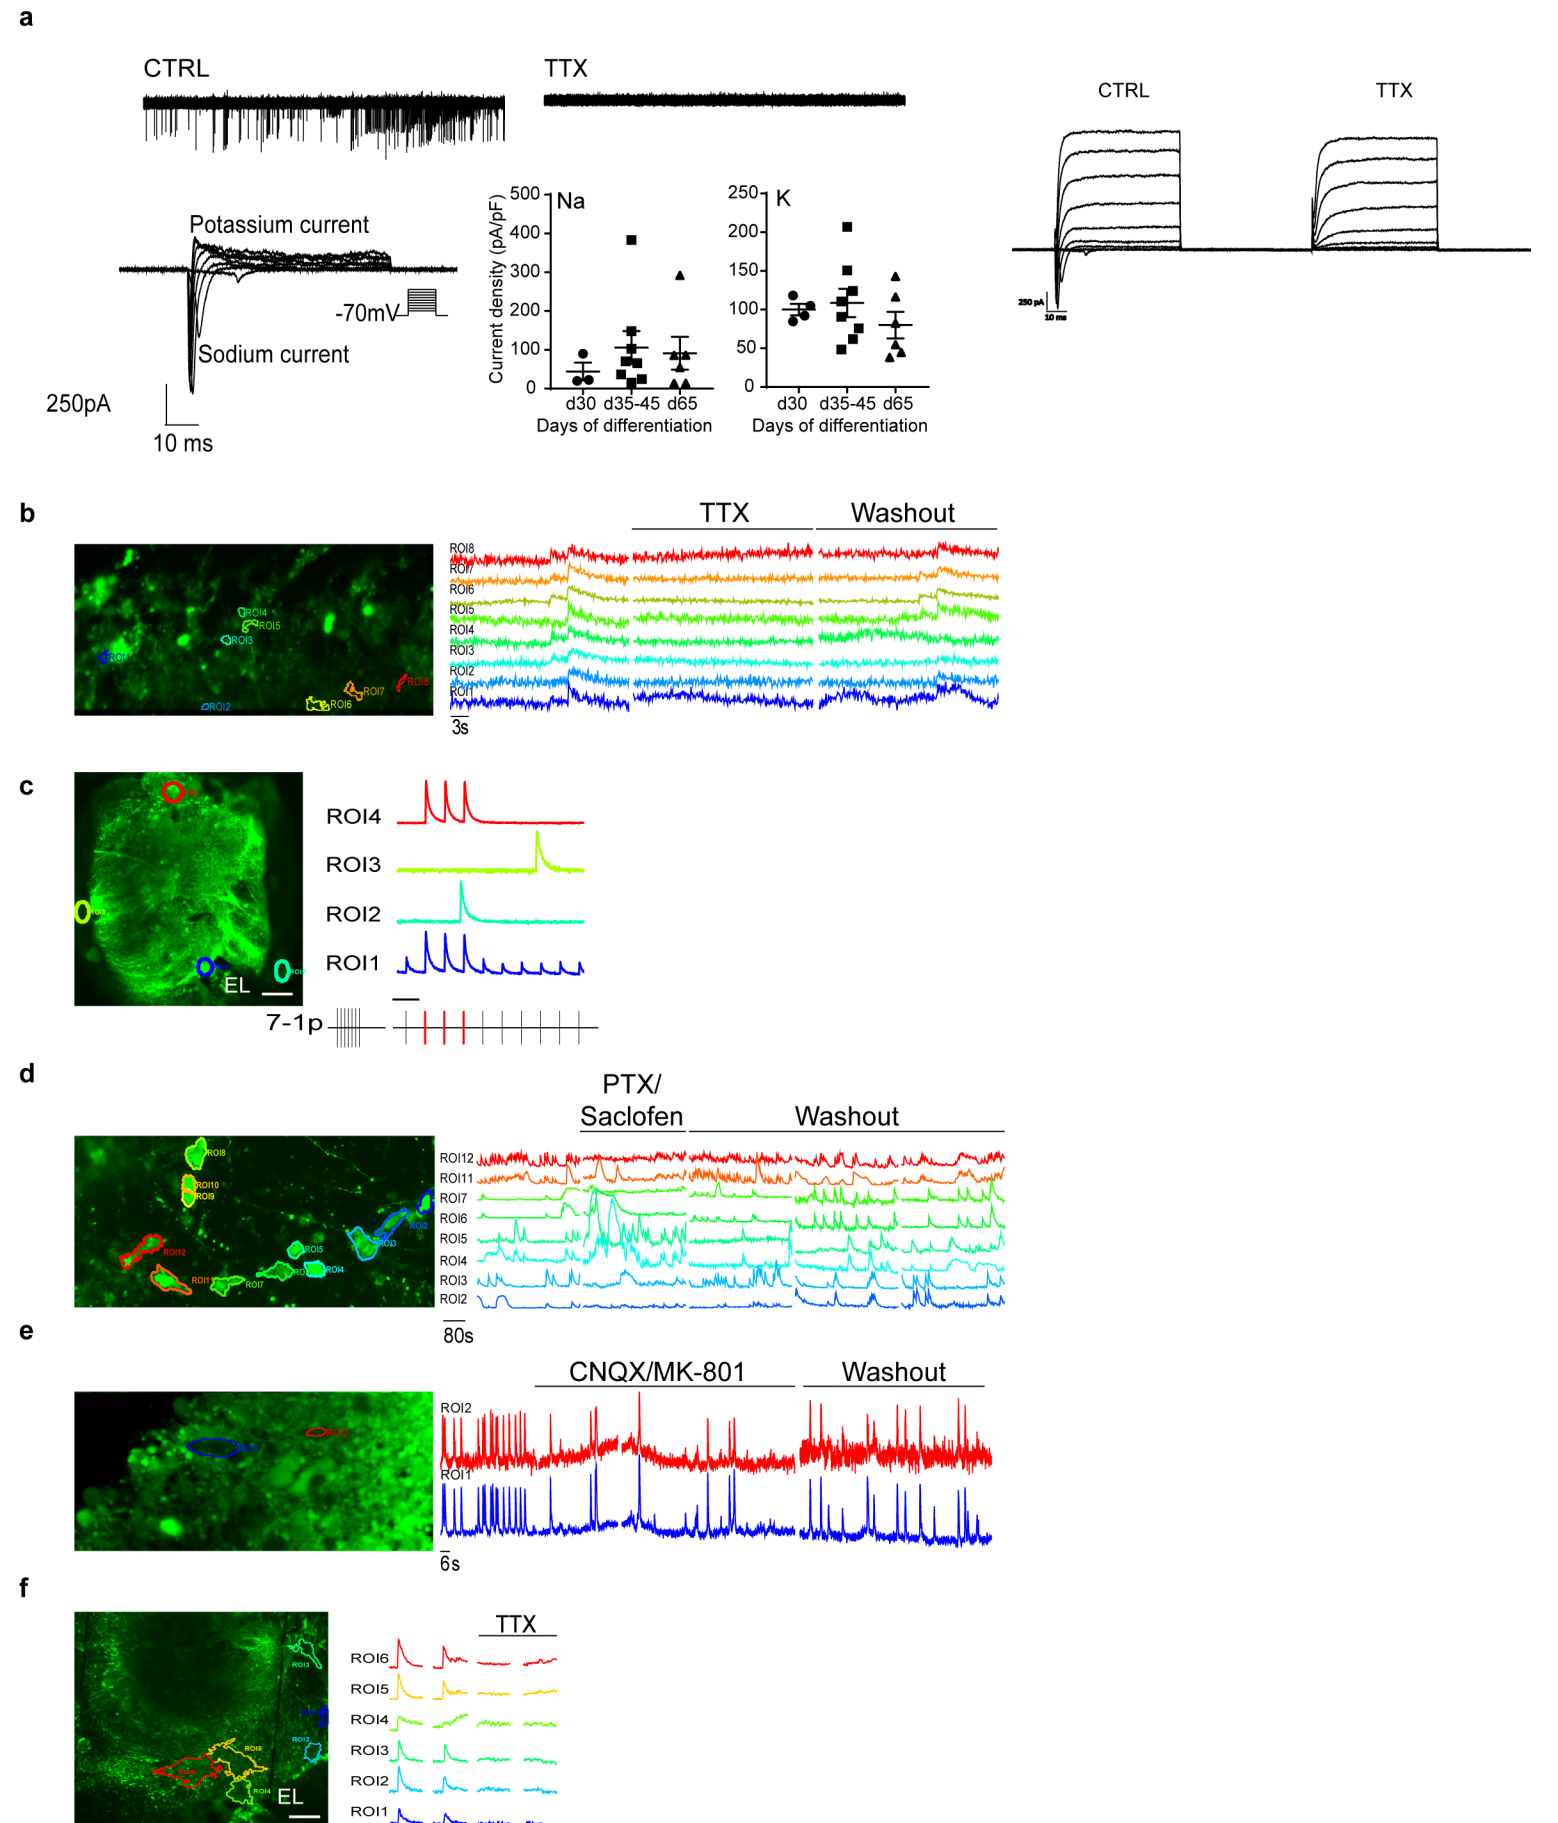

**Supplementary Fig. 6| Development of neuronal networks during BENO generation.** **a**, Representative excitatory postsynaptic potential (EPSP) trace of a neuron in d30 BENO disappears upon TTX treatment. Trace of a typical sodium and potassium current upon whole-cell patch-clamp recording. Right, sodium and potassium current density during different stages of neuronal development (d30, d35-45, d65). Patch recordings are from single neurons (data averaged from 3 independent BENO/time point  $\pm$  SEM). **b**, TTX-sensitive spontaneous activity in 21 days old BENO. **c**, GDP-like events stimulated in d27 BENO by high frequency electrical stimulation (HFS) administered via a bipolar electrode to the indicated region of interest (ROI) 1. Single pulses stimulated the proximal region, but did not propagate to ROI4. ROI2 and 3 show only spontaneous regional GDPs. Stimulation was delivered every 30 s. Single pulses are depicted with black lines and HFS with red. Scale bar: 200  $\mu$ m. **d**, **e**, Close-up view showing synchronized calcium activity of individual neurons in d35 BENO. Traces of four different pairs of synchronous ROIs (2-3, 4-5, 6-7, 11-12) are desynchronized upon GABA block by PTX/Saclofen and re-synchronized upon washout (**d**). Reduction of spontaneous activity by glutamatergic block by CNQX/MK-801 in two ROIs (**e**). **f**, TTX-sensitive activity after electrical stimulation of a d21 BENO. Scale bar: 200  $\mu$ m.



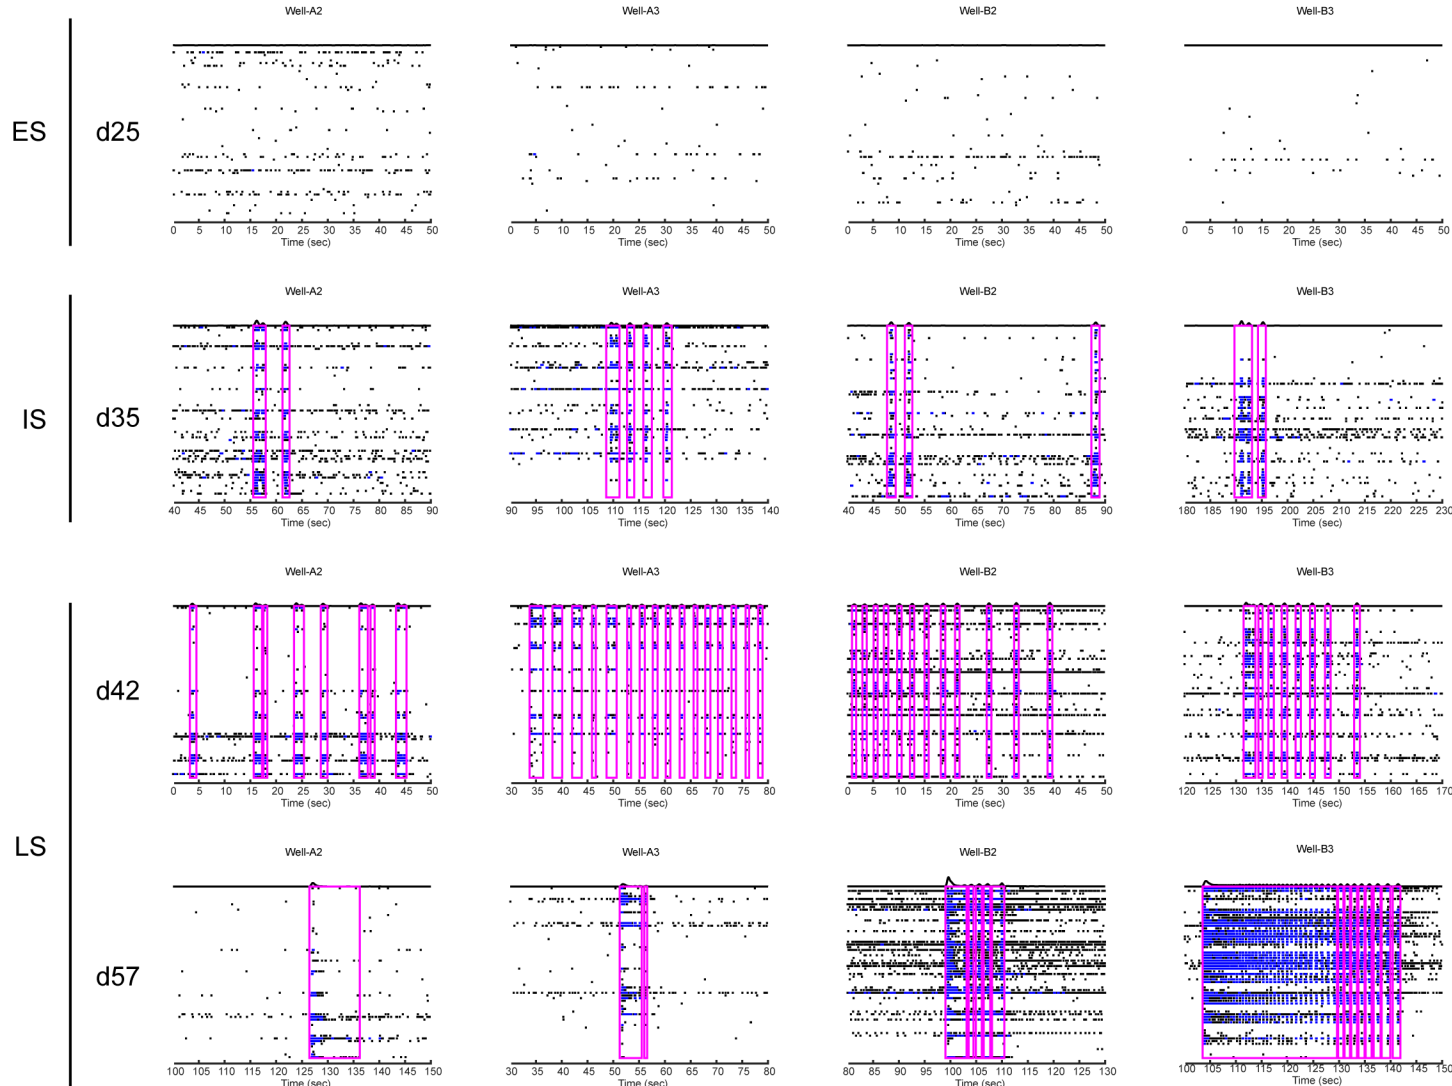

**Supplementary Fig. 7 | MEA monitoring of neuronal network development in d20-d57 BENOs.** Representative raster plots of 4 BENOs at different time points. In the snapshot only 50 sec from 10 min measurements are captured. At d25 no network bursts (NB) were detected; at d35 NBs appeared scarcely; at d42 NBs appeared frequently; at d57 NBs developed complex patterns.

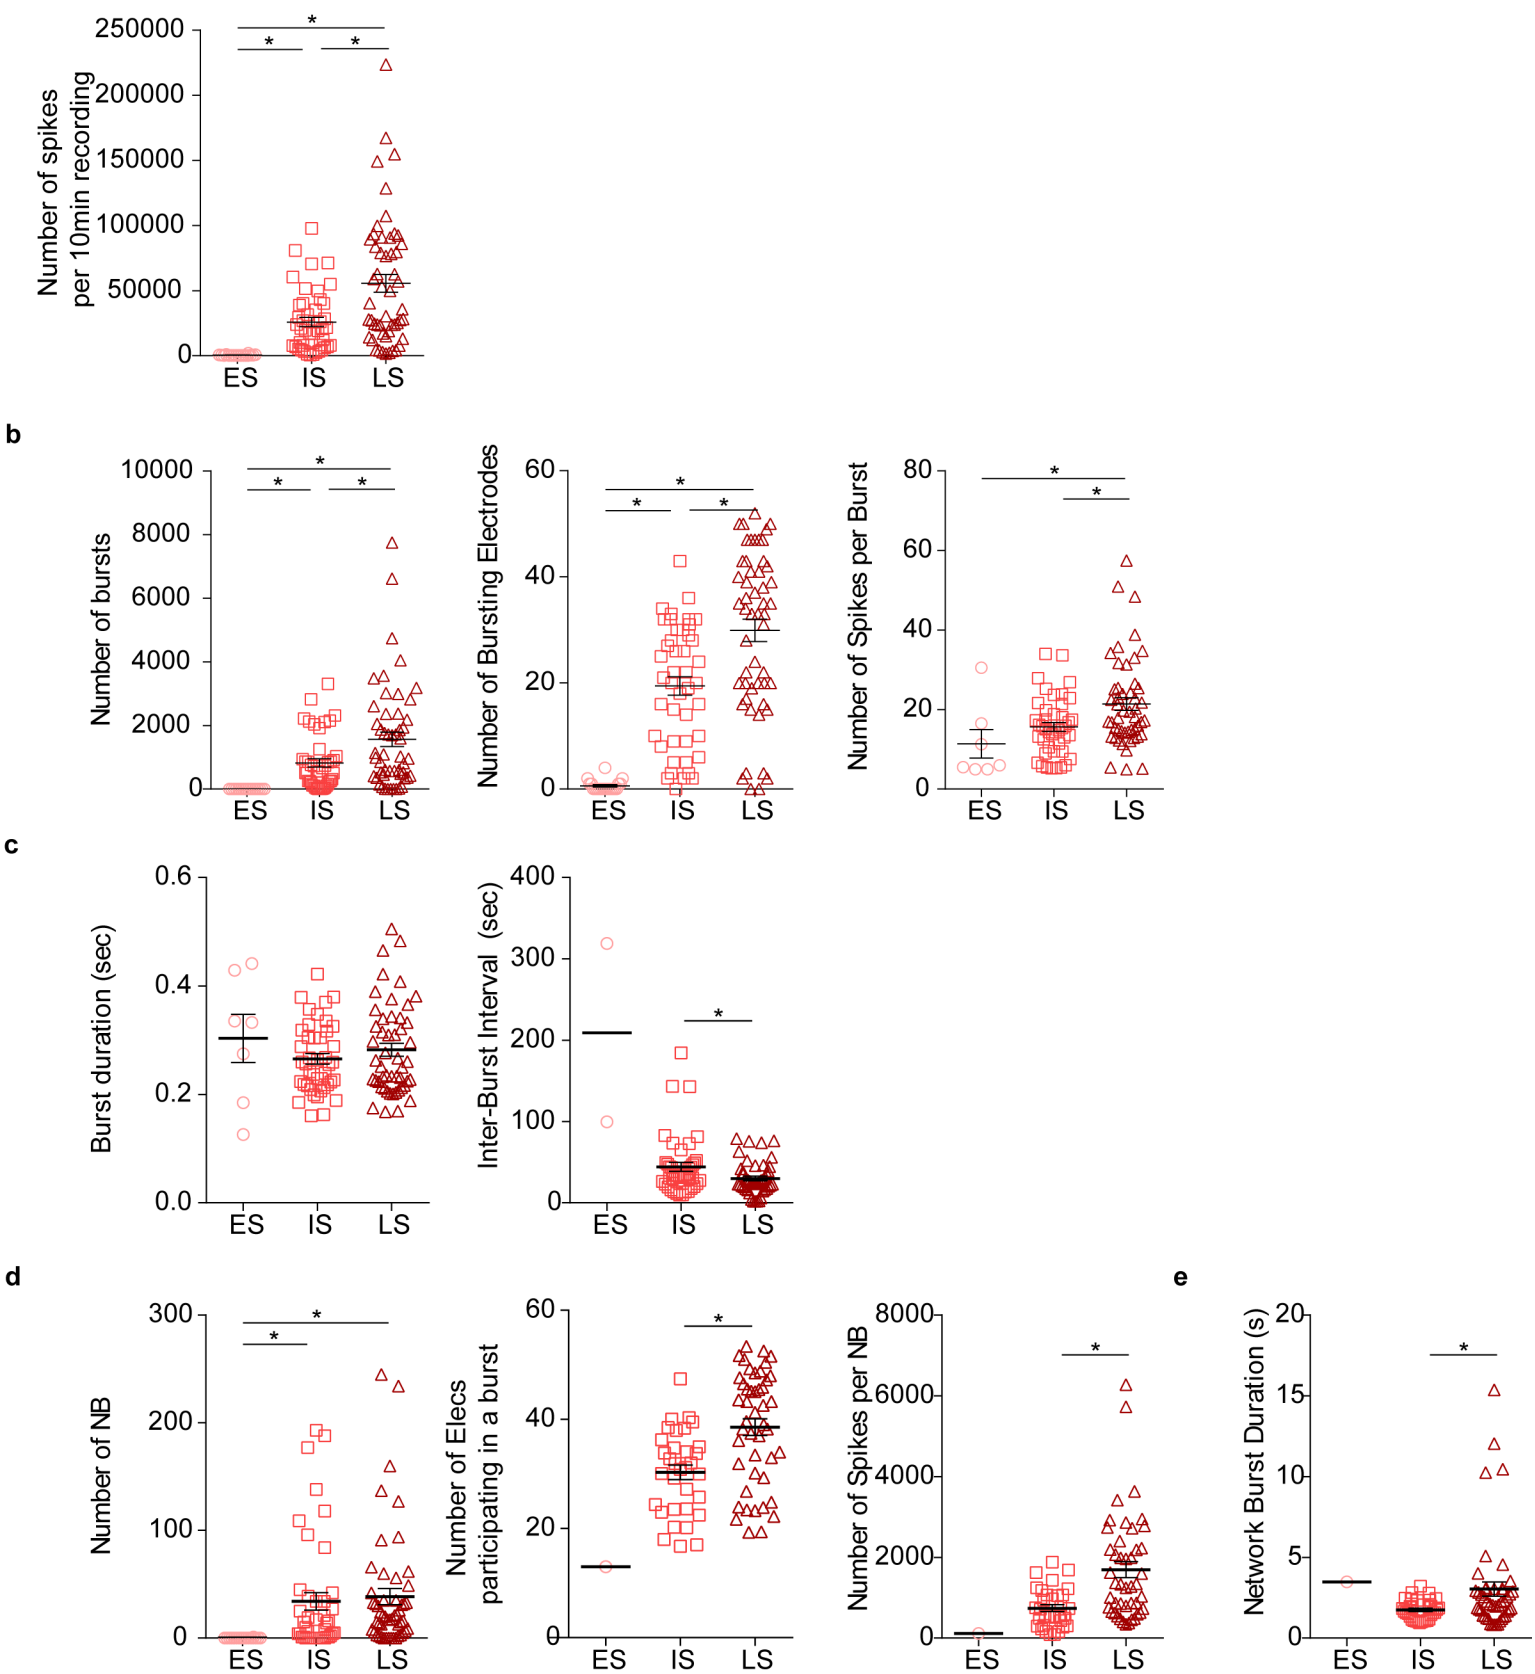

**Supplementary Fig. 8| Parameters describing neuronal network activity in d20-d57 BENOs.** **a**, Parameter of general neuronal activity: more than 5,000 spikes per min recording were detected in average in d57, i.e., LS-BENOs. **b**, Parameters describing the organization of spikes in bursts of a single electrode: total number of bursts, the number of bursting electrodes, and the number of spikes in a burst significantly increased over time. **c**, Although burst duration did not increase, the inter-burst interval significantly decreased resulting in an increased burst frequency. **d**, Parameters describing the organization of bursts into network bursts: the total number of NB, the number of electrodes participating in a NB, and the number of spikes in a NB significantly increased over time. **e**, network burst duration increased over time revealing the complexity of the network at LS BENOs. Data are presented as mean values  $\pm$  SEM. \* $p < 0.05$  one-way ANOVA with Tukey's multiple comparisons post hoc test (a-c); For parameters where ES BENOs contained less than 3 values, IS and LS BENOs were analysed by unpaired two-tailed Student's *t*-test \* $p < 0.05$ . ES: early stage BENOs; IS: intermediate stage BENOs; LS: late stage BENOs.



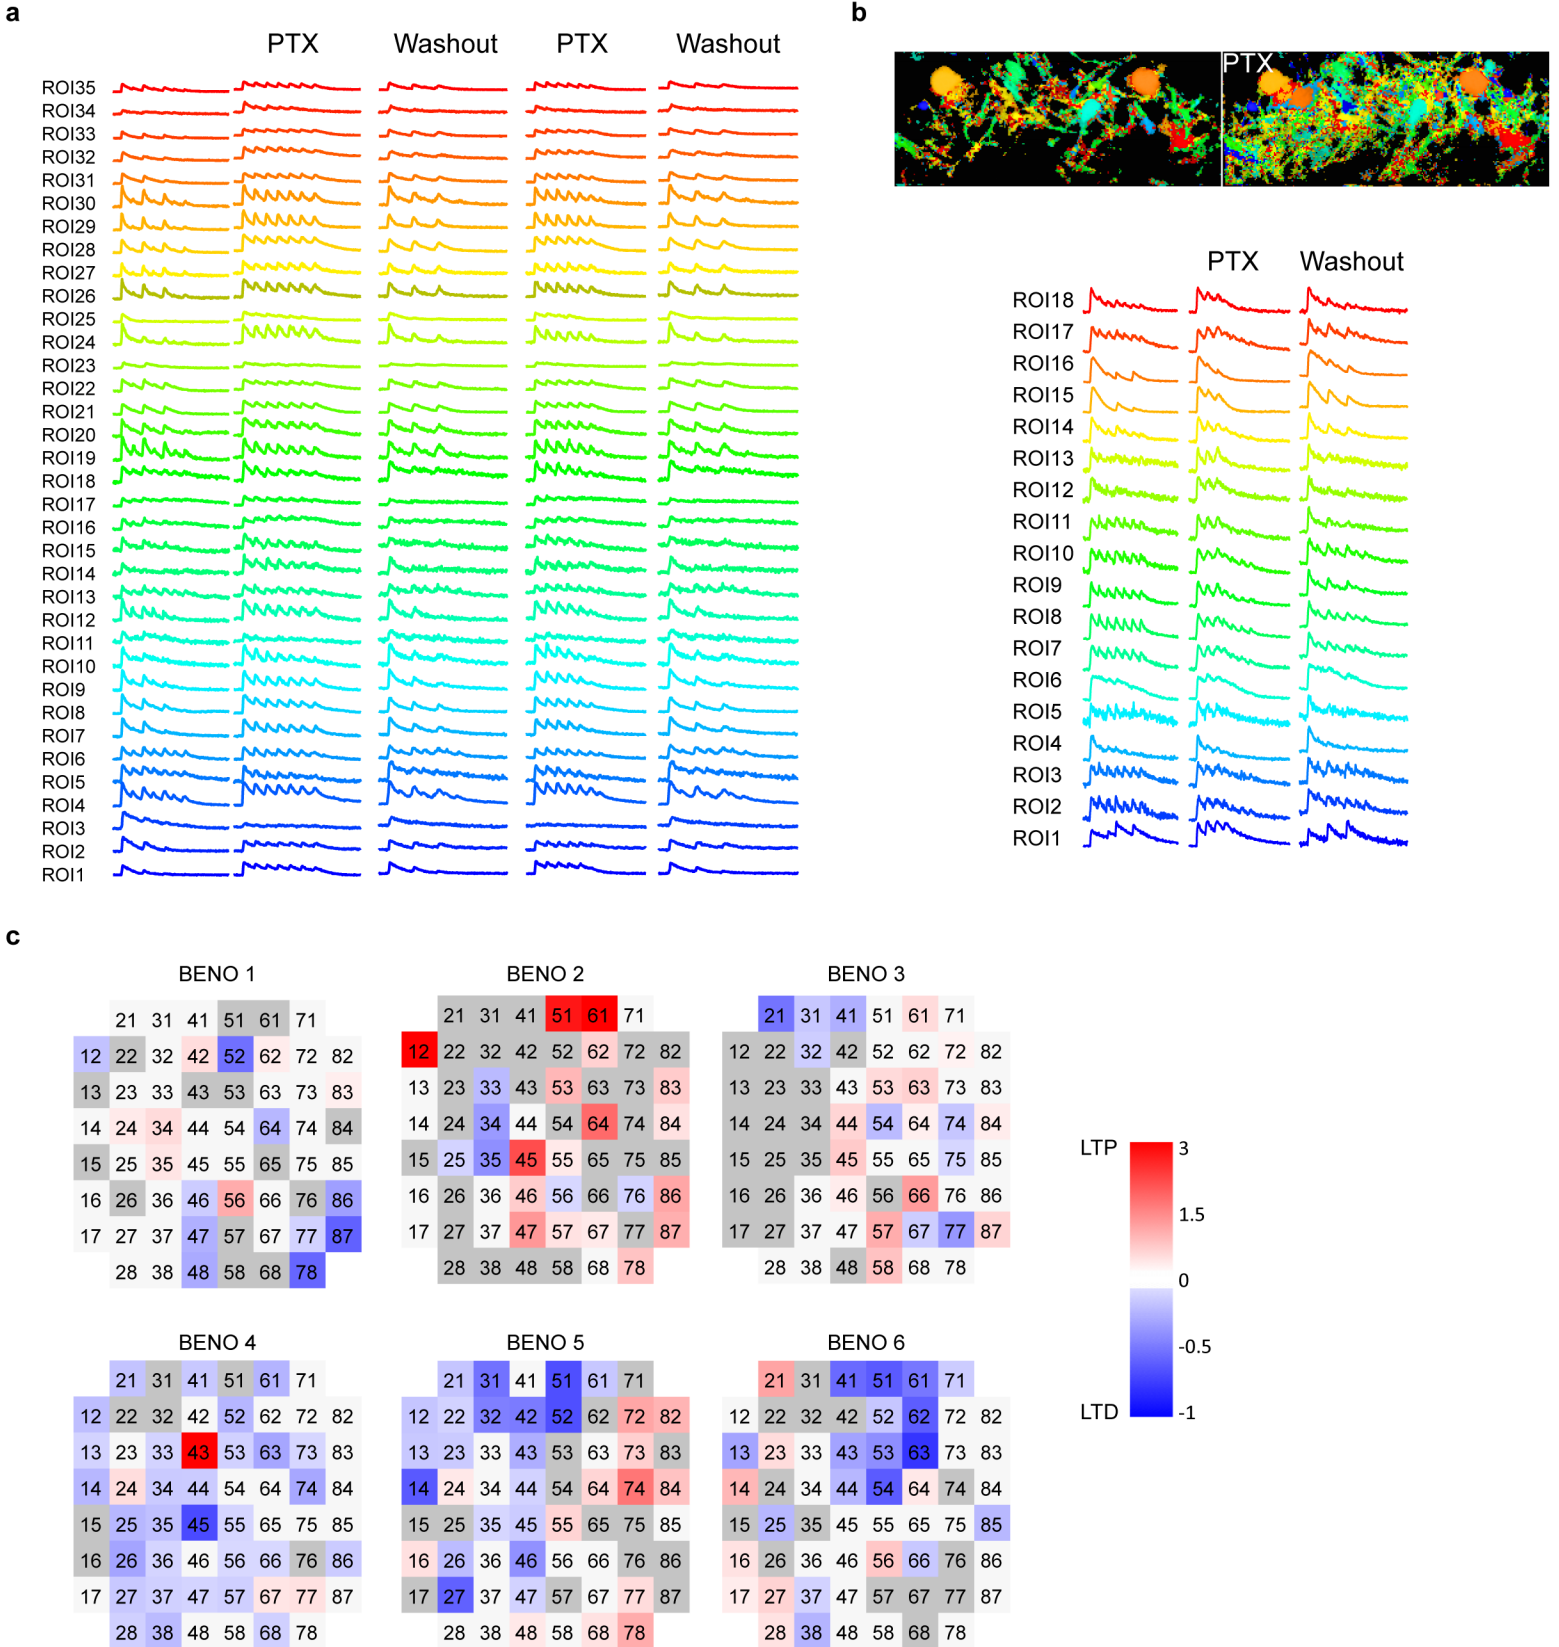

**Supplementary Fig. 9| Network plasticity in BENOS.** **a**, Calcium traces of 35 ROIs showing PPD. Upon PTX PPD is alleviated and upon washout PPD re-appeared. **b**, Calcium traces of 18 ROIs in a another BENO on d49. The observed PPD was alleviated upon PTX and upon washout re-appeared. **c**, Activity heat maps from 6 measurements for LTP induction in 6 different BENOs. Grey fields depict electrodes with no signal, white stable signal, red >15% LTP and blue >15% LTD 1h after HFS. Traces in main Figure 6f are from BENO 6.

# Supplementary Tables

Supplementary Table 1. Detailed antibody list containing respective dilutions for WmIF

| Antibody                  | Order nr   | Company          | Clonality | Raised in   | Dilution |
|---------------------------|------------|------------------|-----------|-------------|----------|
| Anti-GFAP                 | 840001     | Biolegend GmbH   | poly      | rabbit      | 1:500    |
| Anti-PAX6                 | 901301     | Biolegend GmbH   | poly      | rabbit      | 1:500    |
| Anti-Vglut1               | 821301     | Biolegend GmbH   | mono      | Mouse IgG1  | 1:50     |
| Anti-SYP                  | 837101     | Biolegend GmbH   | mono      | Mouse IgM   | 1:1000   |
| Anti-Gaba(B)R2            | 820501     | Biolegend GmbH   | mono      | Mouse IgG1  | 1:50     |
| Anti-TUJ1                 | 801202     | Biolegend GmbH   | mono      | Mouse IgG2a | 1:5000   |
| Anti-MAP2                 | 801801     | Biolegend GmbH   | mono      | Mouse IgG1  | 1:4000   |
| Anti-MAP2                 | 188002     | Synaptic systems | poly      | rabbit      | 1:400    |
| Anti-GluR1                | PA1-46151  | Thermoscientific | poly      | rabbit      | 1:100    |
| Anti-PSD95                | 810301     | Biolegend GmbH   | mono      | Mouse IgG1  | 1:100    |
| Anti-NF (H)               | 822601     | Biolegend GmbH   | poly      | Chicken IgY | 1:20000  |
| Anti-GABA                 | A2052      | Sigma            | poly      | rabbit      | 1:300    |
| Anti-Ki67                 | M7240      | DAKO             | mono      | Mouse IgG1  | 01:20    |
| Anti-TH                   | AB152      | merck millipore  | poly      | rabbit      | 1:500    |
| Anti-Tbr2                 | 14-4877-82 | ebioscience      | mono      | Mouse IgG1  | 1:200    |
| Anti-CTIP2                | ab18465    | abcam            | mono      | Rat IgG     | 1:600    |
| Anti-MBP                  | 836504     | Biolegend GmbH   | mono      | Mouse IgG1  | 1:100    |
| Anti-S100                 | 287004     | Synaptic systems | poly      | guiney pig  | 1:500    |
| Anti-Olig2                | ab9610     | merck millipore  | poly      | rabbit      | 1:100    |
| Anti-CNPase               | C5992      | Sigma            | mono      | Mouse IgG1  | 1:100    |
|                           |            |                  |           |             |          |
|                           |            |                  |           |             |          |
| Alexa488 anti-Goat        | A-11055    | Thermoscientific |           | Donkey      | 1:400    |
| Alexa568 anti-Goat        | A-11057    | Thermoscientific |           | Donkey      | 1:400    |
| Alexa647 anti-Goat        | A-21447    | Thermoscientific |           | Donkey      | 1:400    |
| goat anti-chicken IgY-488 | A-11039    | Thermoscientific | -         | goat        | 1:400    |

Supplementary Table 2. Detailed primer sequence list

| Transcript | Species | GenBank        | Primer | Sequence (5' --> 3')        | Fragment length (bp) | Annealing temperature |
|------------|---------|----------------|--------|-----------------------------|----------------------|-----------------------|
| GABBR2     | human   | NM_005458      | F      | ACC AAC TTC TTC GGG GTC AC  | 96                   | 60°C                  |
|            |         |                | R      | CAC CTC CCT GCT GTC TTG AA  |                      |                       |
| GAPDH      | human   | NM_002046      | F      | AAG GCT GTG GGC AAG GTC ATC | 248                  | 60°C                  |
|            |         |                | R      | GCG TCA AAG GTG GAG GAG TGG |                      |                       |
| GFAP       | human   | NM_001131019   | F      | GCA GAT TCG AGG GGG CAA AA  | 104                  | 60°C                  |
|            |         |                | R      | TCT GGT GAG CCTGTA TTG GT   |                      |                       |
| GRIN1      | human   | NM_007327      | F      | CGT GAG TCC AAG GCA GAG AA  | 80                   | 60°C                  |
|            |         |                | R      | TCT TTC GCC TCC ATC AGC AG  |                      |                       |
| GPR22      | human   | NM_005295.2    | F      | ATGTTTATGACCTCTTCCCCC       | 121                  | 60°C                  |
|            |         |                | R      | TGCTATTGGCCCTCTGCTAAA       |                      |                       |
| MAP2       | human   | NM_002374.3    | F      | GAGAATGGGATCAACGGAGA        | 100                  | 60°C                  |
|            |         |                | R      | CTGCTACAGCCTCAGCAGTG        |                      |                       |
| OCT4       | human   | NM_002701      | F      | CAGTGCCCGAAACCCACAC         | 161                  | 60°C                  |
|            |         |                | R      | GGAGACCCAGCAGCCTCAAA        |                      |                       |
| PAX6       | human   | NM_001258465.1 | F      | CCCCACATATGCAGACACAC        | 112                  | 60°C                  |
|            |         |                | R      | TCACTTCCGGGAACCTGAAC        |                      |                       |
| TBP        | human   | NM_003194.4    | F      | GCACAGGAGCCAAGAGTGAA        | 176                  | 60°C                  |
|            |         |                | R      | TTGTTGGTGGGTGAGCACAA        |                      |                       |
