# Supplementary material for: Developmental GABA polarity switch and neuronal plasticity in Bioengineered Neuronal Organoids
Source: Springer Nature journal article supplement (doi:10.1038/s41467-020-17521-w), 2020-07-29
Supplement: MOESM2 [file 41467_2020_17521_MOESM2_ESM.pdf › 41467_2020_17521_MOESM2_ESM.pdf]

## **Description of Additional Supplementary Files**

File Name: Supplementary Data 1

Description: Gene ontology analysis of transcripts regulated in BENOs d15 vs d40.

File Name: Supplementary Movie 1

Description: Time-lapse video of overview calcium activity of BENO 1 on d21 showing partial GDP-like events.

File Name: Supplementary Movie 2

Description: Repeat time-lapse video of calcium activity in BENO 1 (the same BENO of supplementary video 1) on d27 indicating extended GDP-like events.

File Name: Supplementary Movie 3

Description: Time-lapse video of overview of calcium activity of BENO 2 on d36 showing GDP-like events.
