# Supplementary material for: Developmental GABA polarity switch and neuronal plasticity in Bioengineered Neuronal Organoids
Source: Nat Commun. 2020 Jul 29;11:3791. doi: 10.1038/s41467-020-17521-w (PMC7391775; doi:10.1038/s41467-020-17521-w)
Supplement: Supplementary file 3 — Supplementary Data 1 [file 41467_2020_17521_MOESM3_ESM.xlsx]

## Sheet: GO D15vsD40 regulated genes
	D15vsD40 Up regulated genes
GOID	GOTerm	Ontology Source	Term PValue	Term PValue Corrected with Benjamini-Hochberg	Group PValue	Group PValue Corrected with Benjamini-Hochberg	GOLevels	GOGroups	% Associated Genes	Nr. Genes	Associated Genes Found
GO:0050804	modulation of chemical synaptic transmission	GO_BiologicalProcess-EBI-UniProt-GOA_24.08.2018_00h00	3.90335e-46	3.94239e-44	3.90335e-46	2.92751e-45	[4, 5, 6, 7, 8]	Group08	33.5306	170	[ABAT, ABCB6, ACHE, ADCY1, ADCY8, ADCYAP1, ADGRB1, ADORA1, ADRA1A, AKAP9, APBA1, APC2, ASIC1, ATP6V0A4, BAIAP3, BRSK1, BRSK2, CACNA1A, CACNA2D2, CACNB3, CACNG4, CALB1, CAMK2A, CAMK2B, CBLN1, CDK5, CELF4, CHRM2, CHRNA4, CHRNB2, CLSTN2, CLSTN3, CNIH2, CNR1, CNTNAP4, CPEB3, CPLX2, CRMP1, CUX2, CX3CL1, DCC, DGKE, DGKI, DLG2, DLG4, DRD2, EFNB3, EPHB1, FBXL2, FGF14, GNAI1, GPRIN1, GRIA1, GRID2, GRIK1, …
GO:0050806	positive regulation of synaptic transmission	GO_BiologicalProcess-EBI-UniProt-GOA_24.08.2018_00h00	2.30287e-17	8.94577e-17	3.90335e-46	2.92751e-45	[3, 4, 5, 6, 7, 8, 9]	Group08	32.9843	63	[ABAT, ABCB6, ADCYAP1, ADORA1, ADRA1A, ATP6V0A4, BAIAP3, CACNB3, CALB1, CHRNB2, CLSTN2, CLSTN3, CRMP1, CUX2, DLG2, DLG4, DRD2, GPRIN1, GRIK2, GRIN1, HAP1, IGSF9B, KALRN, KCTD13, LGI1, LRRN2, LRRTM2, MYOZ3, NLGN2, NPTN, NRXN1, NSG1, NTRK2, PLCL1, PLK2, PLP2, PRKCE, PRNP, RAB3B, RELN, RGS4, RIMS1, S100B, SCN9A, SERPINE2, SHANK2, SHISA7, SLC24A2, SLC8A2, SLC8A3, SNAP25, SNCA, STX1A, STX1B, STXBP1, S…
GO:0048167	regulation of synaptic plasticity	GO_BiologicalProcess-EBI-UniProt-GOA_24.08.2018_00h00	6.55176e-22	3.89252e-21	3.90335e-46	2.92751e-45	[3, 5, 6, 7, 8, 9]	Group08	34.3891	76	[ABCB6, ADGRB1, ADORA1, APC2, ATP6V0A4, BRSK1, BRSK2, CALB1, CAMK2A, CAMK2B, CBLN1, CDK5, CPEB3, CPLX2, CX3CL1, DGKI, DLG2, DLG4, DRD2, FGF14, GPRIN1, GRIA1, GRID2, GRIK2, GRIN1, GRIN2B, GRIN2D, GRM5, JPH3, JPH4, KALRN, LRRN2, LRRTM2, MAPT, MEF2C, NCDN, NEURL1, NPAS4, NPTN, NSG1, NTRK2, PICK1, PLCL1, PLK2, PLP2, PPFIA3, PPP3CB, PRNP, RAB3A, RAPGEF2, RASGRF1, RELN, S100B, SCN9A, SERPINE2, SHANK2, …
GO:0060291	long-term synaptic potentiation	GO_BiologicalProcess-EBI-UniProt-GOA_24.08.2018_00h00	6.01418e-08	8.55538e-08	3.90335e-46	2.92751e-45	[4, 5, 6, 7, 8, 9, 10]	Group08	30	30	[ABCB6, ADORA1, ATP6V0A4, CALB1, DLG2, DRD2, KALRN, LRRN2, LRRTM2, NPTN, NSG1, NTRK2, PLCL1, PLK2, PLP2, PRNP, RELN, S100B, SCN9A, SERPINE2, SHANK2, SHISA7, SLC24A2, SLC8A2, SLC8A3, SNAP25, SNCA, SYT11, TNR, TSHZ3]
GO:0048168	regulation of neuronal synaptic plasticity	GO_BiologicalProcess-EBI-UniProt-GOA_24.08.2018_00h00	1.50818e-10	2.53877e-10	3.90335e-46	2.92751e-45	[4, 6, 7, 8, 9, 10]	Group08	39.4366	28	[ATP6V0A4, CAMK2A, CAMK2B, DLG4, DRD2, GPRIN1, GRIK2, GRIN1, GRM5, JPH3, KALRN, NCDN, NEURL1, NPTN, PLP2, PPFIA3, RAB3A, RASGRF1, S100B, SHISA7, SHISA9, SLC8A2, SNCA, SYNGR1, SYNPR, SYP, SYT4, UNC13A]
GO:0010770	positive regulation of cell morphogenesis involved in differentiation	GO_BiologicalProcess-EBI-UniProt-GOA_24.08.2018_00h00	3.16153e-06	3.71296e-06	2.07658e-40	1.03829e-39	[4, 5, 6, 7, 8]	Group15	22.043	41	[APC2, ARHGEF7, BMPR2, CAMK2B, CDH4, CDKL5, CRMP1, CUX2, DMTN, DSCAM, GDI1, ISLR2, KALRN, L1CAM, LRP8, MAP1B, MAP3K13, MAPT, NEFL, NELL1, NRP1, NTRK2, NTRK3, OPTN, PAK3, PARP6, PLXNC1, RAC3, RELN, ROBO1, ROBO2, RTN4, RUFY3, S100A10, SEMA3A, SEMA7A, SLC9A3R2, SLITRK1, TET2, TRPC5, TRPV2]
GO:0010771	negative regulation of cell morphogenesis involved in differentiation	GO_BiologicalProcess-EBI-UniProt-GOA_24.08.2018_00h00	3.44185e-06	3.99571e-06	2.07658e-40	1.03829e-39	[4, 5, 6, 7, 8]	Group15	26.1682	28	[CDK5, CDK5R1, DAB1, DCC, DMTN, DNM3, EFNB3, FSTL4, GDI1, LINGO1, MCF2, NELL1, NRP1, OPTN, PLXNA3, PTPRO, RAPGEF2, RTN4, RTN4R, RUFY3, SEMA3A, SEMA4F, THY1, TNR, TRIM46, TRPC5, ULK2, YWHAH]
GO:0030182	neuron differentiation	GO_BiologicalProcess-EBI-UniProt-GOA_24.08.2018_00h00	7.2045e-40	1.45531e-38	2.07658e-40	1.03829e-39	[4, 6, 7, 8]	Group15	21.0981	342	[ACAP3, ACSBG1, ADCY1, ADCYAP1, ADGRB1, ADGRB3, ALK, ANK3, ANKS1A, APBB1, APC2, ARF4, ARFGEF3, ARHGAP44, ARHGEF7, ARX, ASH1L, ATAT1, ATCAY, ATP2B2, ATP6V0A4, ATP8A2, B4GAT1, BEND6, BICDL1, BIN1, BMP5, BMPR2, BRINP1, BRINP2, BRINP3, BRSK1, BRSK2, CA8, CACNA1A, CAMK1D, CAMK2A, CAMK2B, CAMSAP2, CAMSAP3, CBLN1, CCSAP, CDH4, CDHR1, CDK5, CDK5R1, CDKL5, CELSR3, CEND1, CHD5, CHL1, CHODL, CHRNB2, CNGB1, …
GO:0048666	neuron development	GO_BiologicalProcess-EBI-UniProt-GOA_24.08.2018_00h00	5.77377e-45	2.91575e-43	2.07658e-40	1.03829e-39	[4, 5, 7, 8, 9]	Group15	23.3384	309	[ACAP3, ACSBG1, ADCY1, ADCYAP1, ADGRB1, ADGRB3, ALK, ANK3, ANKS1A, APBB1, APC2, ARF4, ARFGEF3, ARHGAP44, ARHGEF7, ARX, ASH1L, ATAT1, ATCAY, ATP6V0A4, ATP8A2, B4GAT1, BICDL1, BMP5, BMPR2, BRSK1, BRSK2, CA8, CACNA1A, CAMK1D, CAMK2A, CAMK2B, CAMSAP2, CAMSAP3, CCSAP, CDH4, CDHR1, CDK5, CDK5R1, CDKL5, CELSR3, CHL1, CHODL, CHRNB2, CNGB1, CNR1, CNTN1, COL25A1, CPEB3, CPNE5, CPNE6, CRMP1, CRTAC1, CSMD3, …
GO:0050767	regulation of neurogenesis	GO_BiologicalProcess-EBI-UniProt-GOA_24.08.2018_00h00	6.53075e-22	4.12254e-21	2.07658e-40	1.03829e-39	[5, 6, 7, 8]	Group15	20.7039	200	[ABCC8, ACAP3, ADCYAP1, ADGRB3, ADGRG1, APBB1, APC2, ARHGAP44, ARHGEF7, ASH1L, ATP6V0A4, ATP8A2, BEND6, BIN1, BMP5, BMPR2, BRINP1, BRINP2, BRINP3, BRSK1, BRSK2, C16orf45, CA8, CACNA1A, CAMK1D, CAMK2A, CAMK2B, CAMSAP2, CDH4, CDK5, CDK5R1, CDKL5, CHODL, CHRNB2, CNR1, CNTN1, COL3A1, CPEB3, CPNE5, CPNE6, CRMP1, CSMD3, CUX2, CX3CL1, DAB1, DCC, DGKE, DISP3, DLG4, DLX1, DNM3, DPYSL2, DRD2, DSCAM, DTX1, …
GO:0050768	negative regulation of neurogenesis	GO_BiologicalProcess-EBI-UniProt-GOA_24.08.2018_00h00	1.29836e-07	1.79636e-07	2.07658e-40	1.03829e-39	[4, 5, 6, 7, 8, 9]	Group15	20.059	68	[ABCC8, ADCYAP1, ADGRG1, ASH1L, ATP6V0A4, BRINP1, C16orf45, CDK5, CDK5R1, COL3A1, CRMP1, CX3CL1, DAB1, DCC, DGKE, DISP3, DLX1, DNM3, DTX1, EFNB3, ERBB4, FSTL4, GDI1, GNRH1, GPR173, HOOK3, INPP5F, INPP5J, ISL1, KIAA0319, LDLR, LINGO1, MCF2, NELL1, NEXMIF, NRG3, NRP1, NTRK3, OPTN, PKD1, PLK2, PLP2, PLXNA3, PTPRO, RAP1GAP2, RAPGEF2, RTN4, RTN4R, RTN4RL1, RUFY3, SEMA3A, SEMA4F, SEZ6, SIRT2, SPOCK1, S…
GO:0050769	positive regulation of neurogenesis	GO_BiologicalProcess-EBI-UniProt-GOA_24.08.2018_00h00	2.71108e-12	5.82593e-12	2.07658e-40	1.03829e-39	[4, 5, 6, 7, 8, 9]	Group15	20.0337	119	[ADCYAP1, APBB1, APC2, ARHGEF7, ASH1L, ATP6V0A4, ATP8A2, BEND6, BIN1, BMP5, BMPR2, BRINP1, BRINP2, BRINP3, CA8, CAMK1D, CAMK2B, CDH4, CDKL5, CNR1, CNTN1, CPEB3, CPNE5, CPNE6, CRMP1, CUX2, CX3CL1, DAB1, DLG4, DLX1, DRD2, DSCAM, DUSP26, EPHA3, EPHA5, FKBP1B, GDI1, GDPD5, HAP1, ISLR2, ITGA3, KALRN, KIDINS220, L1CAM, LIG4, LRP8, LRRC7, LZTS1, MAGI2, MAP1B, MAP3K13, MAPT, MEF2C, NDRG4, NEDD4L, NEFL, N…
GO:0045664	regulation of neuron differentiation	GO_BiologicalProcess-EBI-UniProt-GOA_24.08.2018_00h00	2.62115e-21	1.32368e-20	2.07658e-40	1.03829e-39	[5, 6, 7, 8, 9]	Group15	21.7722	172	[ACAP3, ADCYAP1, ADGRB3, APBB1, APC2, ARHGAP44, ARHGEF7, ASH1L, ATP6V0A4, ATP8A2, BEND6, BIN1, BMP5, BMPR2, BRINP1, BRINP2, BRINP3, BRSK1, BRSK2, CA8, CACNA1A, CAMK1D, CAMK2B, CAMSAP2, CDH4, CDK5, CDK5R1, CDKL5, CHODL, CHRNB2, CNR1, CNTN1, CPEB3, CPNE5, CPNE6, CRMP1, CSMD3, CUX2, CX3CL1, DAB1, DCC, DGKE, DISP3, DLG4, DLX1, DNM3, DPYSL2, DSCAM, DTX1, DUSP26, EFNB3, EPHA3, EPHA5, FKBP1B, FSTL4, GAL…
GO:0031175	neuron projection development	GO_BiologicalProcess-EBI-UniProt-GOA_24.08.2018_00h00	1.5538e-41	3.92336e-40	2.07658e-40	1.03829e-39	[5, 6, 8, 9, 10]	Group15	23.6955	277	[ACAP3, ACSBG1, ADCY1, ADCYAP1, ADGRB1, ADGRB3, ANK3, APBB1, APC2, ARF4, ARFGEF3, ARHGAP44, ARHGEF7, ARX, ATCAY, ATP6V0A4, ATP8A2, B4GAT1, BICDL1, BMP5, BMPR2, BRSK1, BRSK2, CA8, CACNA1A, CAMK1D, CAMK2A, CAMK2B, CAMSAP2, CAMSAP3, CDH4, CDK5, CDK5R1, CDKL5, CELSR3, CHL1, CHODL, CHRNB2, CNR1, CNTN1, COL25A1, CPEB3, CPNE5, CPNE6, CRMP1, CRTAC1, CSMD3, CTNNA2, CTNND2, CUX2, CX3CL1, DAB1, DBNDD1, DCC,…
GO:0045666	positive regulation of neuron differentiation	GO_BiologicalProcess-EBI-UniProt-GOA_24.08.2018_00h00	2.68805e-13	6.3138e-13	2.07658e-40	1.03829e-39	[5, 6, 7, 8, 9, 10]	Group15	21.822	103	[ADCYAP1, APBB1, APC2, ARHGEF7, ASH1L, ATP8A2, BEND6, BMP5, BMPR2, BRINP1, BRINP2, BRINP3, CA8, CAMK1D, CAMK2B, CDH4, CDKL5, CNR1, CNTN1, CPEB3, CPNE5, CPNE6, CRMP1, CUX2, CX3CL1, DAB1, DLG4, DLX1, DSCAM, DUSP26, EPHA3, EPHA5, FKBP1B, GDI1, GDPD5, ISLR2, ITGA3, KALRN, KIDINS220, L1CAM, LRP8, LRRC7, LZTS1, MAGI2, MAP1B, MAP3K13, MAPT, MEF2C, NDRG4, NEDD4L, NEFL, NEGR1, NELL1, NEURL1, NPTN, NRP1, N…
GO:0048667	cell morphogenesis involved in neuron differentiation	GO_BiologicalProcess-EBI-UniProt-GOA_24.08.2018_00h00	1.63421e-32	2.35793e-31	2.07658e-40	1.03829e-39	[5, 6, 7, 8, 9, 10]	Group15	26.1248	180	[ACSBG1, ADCY1, ADGRB1, ADGRB3, ANK3, APBB1, APC2, ARHGAP44, ARHGEF7, ARX, ATP6V0A4, ATP8A2, B4GAT1, BMPR2, BRSK1, BRSK2, CACNA1A, CAMK2A, CAMK2B, CDH4, CDHR1, CDK5, CDK5R1, CDKL5, CELSR3, CHL1, CHRNB2, COL25A1, CRMP1, CTNNA2, CTNND2, CUX2, DAB1, DCC, DCLK1, DCX, DLG4, DLX5, DNM3, DOK4, DOK5, DPYSL2, DRD2, DSCAM, EFNB3, ELAVL4, EPHA3, EPHA5, EPHB1, EVL, FSTL4, GAP43, GDI1, GFRA2, GPRIN1, GRIN1, I…
GO:0016358	dendrite development	GO_BiologicalProcess-EBI-UniProt-GOA_24.08.2018_00h00	1.53169e-14	3.9667e-14	2.07658e-40	1.03829e-39	[3, 6, 7, 9, 10, 11]	Group15	26.087	78	[ADGRB3, APC2, ARF4, ARHGAP44, ARHGEF7, ATP6V0A4, BMP5, CACNA1A, CAMK1D, CAMK2A, CAMK2B, CAMSAP2, CDK5, CDK5R1, CDKL5, CHRNB2, CPEB3, CRMP1, CSMD3, CTNNA2, CTNND2, CUX2, DAB1, DCC, DCLK1, DCX, DLG4, DNM3, DSCAM, ELAVL4, EPHB1, FSTL4, GPRIN1, GRIN1, GRIN3A, KALRN, KCNH8, KIAA0319, KIDINS220, KLF7, KLHL1, LRP8, LZTS3, MAGI2, MAP1B, MAP6, MAPK8IP2, MCF2, MEF2C, NELL1, NEURL1, NRP1, OPTN, PACSIN1, PA…
GO:1990138	neuron projection extension	GO_BiologicalProcess-EBI-UniProt-GOA_24.08.2018_00h00	6.74139e-12	1.36176e-11	2.07658e-40	1.03829e-39	[4, 5, 6, 7, 8, 9, 10, 11, 12]	Group15	27.7778	55	[ACSBG1, APC2, BMPR2, CDH4, CDK5, CDK5R1, CDKL5, CPNE5, CPNE6, DCLK1, DCX, DPYSL2, DSCAM, GDI1, ISLR2, L1CAM, MAP1B, MAP3K13, MAPT, NEDD4L, NELL1, NRN1, NRP1, NRP2, NTRK3, OLFM1, OPTN, PLXNA2, PLXNA3, PLXNA4, PPP3CB, RAPH1, RASAL1, RIMS1, RTN4, RTN4R, RUFY3, SEMA3A, SEMA4F, SEMA7A, SH3GL2, SLC9A6, SLC9A7, SLIT1, SLIT3, SYT1, SYT16, SYT4, TET2, TNR, TRIM46, TRPC5, TRPV2, ULK2, UNC13A]
GO:0007411	axon guidance	GO_BiologicalProcess-EBI-UniProt-GOA_24.08.2018_00h00	2.34681e-14	5.9257e-14	2.07658e-40	1.03829e-39	[4, 5, 6, 7, 8, 9, 10, 11, 12, 13]	Group15	26.3158	75	[ARX, ATP6V0A4, B4GAT1, BMPR2, CDH4, CDK5, CDK5R1, CELSR3, CHL1, CRMP1, DAB1, DCC, DLX5, DOK4, DOK5, DPYSL2, DSCAM, EFNB3, EPHA3, EPHA5, EPHB1, EVL, GAP43, GFRA2, ISL1, KCNH8, KIF5A, KIF5C, KLF7, L1CAM, LGI1, LHX1, LZTS1, MYCBP2, NCAM1, NELL1, NFASC, NFIB, NR4A3, NRP1, NRP2, NRXN1, NRXN3, OPTN, PAM, PIK3CA, PLP2, PLXNA2, PLXNA3, PLXNA4, PRKCA, PTPRM, PTPRO, RASGRF1, RELN, RET, ROBO1, ROBO2, SEMA3…
GO:0010975	regulation of neuron projection development	GO_BiologicalProcess-EBI-UniProt-GOA_24.08.2018_00h00	5.0495e-24	3.64286e-23	2.07658e-40	1.03829e-39	[6, 7, 8, 9, 10, 11]	Group15	24.7475	147	[ACAP3, ADCYAP1, ADGRB3, APBB1, APC2, ARHGAP44, ARHGEF7, ATP8A2, BMP5, BMPR2, BRSK1, BRSK2, CA8, CACNA1A, CAMK1D, CAMK2B, CAMSAP2, CDH4, CDK5, CDK5R1, CDKL5, CHODL, CHRNB2, CNR1, CNTN1, CPEB3, CPNE5, CPNE6, CRMP1, CSMD3, CUX2, CX3CL1, DAB1, DCC, DGKE, DLG4, DNM3, DPYSL2, DSCAM, DUSP26, EFNB3, EPHA3, EPHA5, FKBP1B, FSTL4, GDI1, GPRIN1, GRID2, GRIN1, INPP5F, INPP5J, ISLR2, ITGA3, KALRN, KIAA0319, K…
GO:0010976	positive regulation of neuron projection development	GO_BiologicalProcess-EBI-UniProt-GOA_24.08.2018_00h00	9.45973e-15	2.58225e-14	2.07658e-40	1.03829e-39	[5, 6, 7, 8, 9, 10, 11, 12]	Group15	24.6537	89	[ADCYAP1, APBB1, APC2, ARHGEF7, ATP8A2, BMP5, BMPR2, CA8, CAMK1D, CAMK2B, CDH4, CDKL5, CNR1, CNTN1, CPEB3, CPNE5, CPNE6, CRMP1, CUX2, CX3CL1, DLG4, DSCAM, DUSP26, EPHA3, EPHA5, FKBP1B, GDI1, ISLR2, ITGA3, KALRN, KIDINS220, L1CAM, LRP8, LRRC7, LZTS1, MAGI2, MAP1B, MAP3K13, MAPT, NDRG4, NEDD4L, NEFL, NEGR1, NELL1, NEURL1, NPTN, NRP1, NTRK2, NTRK3, OPTN, PACSIN1, PAK3, PARP6, PCDHA4, PKD1, PLPPR5, P…
GO:0010977	negative regulation of neuron projection development	GO_BiologicalProcess-EBI-UniProt-GOA_24.08.2018_00h00	9.27668e-07	1.17118e-06	2.07658e-40	1.03829e-39	[5, 6, 7, 8, 9, 10, 11, 12]	Group15	23.0337	41	[CDK5, CDK5R1, CRMP1, DAB1, DCC, DGKE, DNM3, EFNB3, FSTL4, GDI1, INPP5F, INPP5J, KIAA0319, LINGO1, MCF2, NELL1, NRP1, OPTN, PLK2, PLXNA3, PTPRO, RAP1GAP2, RAPGEF2, RTN4, RTN4R, RTN4RL1, RUFY3, SEMA3A, SEMA4F, SEZ6, SPOCK1, STMN2, STX1B, TET2, THY1, TNR, TRIM46, TRPC5, ULK2, YWHAH, ZNF365]
GO:0048812	neuron projection morphogenesis	GO_BiologicalProcess-EBI-UniProt-GOA_24.08.2018_00h00	1.4243e-32	2.39757e-31	2.07658e-40	1.03829e-39	[6, 7, 8, 9, 10, 11]	Group15	25.1621	194	[ACSBG1, ADCY1, ADGRB1, ADGRB3, ANK3, APBB1, APC2, ARHGAP44, ARHGEF7, ARX, ATP6V0A4, ATP8A2, B4GAT1, BMPR2, BRSK1, BRSK2, CACNA1A, CAMK2A, CAMK2B, CDH4, CDK5, CDK5R1, CDKL5, CELSR3, CHL1, CHRNB2, COL25A1, CPNE5, CPNE6, CRMP1, CTNNA2, CTNND2, CUX2, DAB1, DCC, DCLK1, DCX, DLG4, DLX5, DNM3, DOK4, DOK5, DPYSL2, DRD2, DSCAM, EFNB3, ELAVL4, EPB41L3, EPHA3, EPHA5, EPHB1, EVL, FSTL4, GAP43, GDI1, GFRA2, …
GO:0061564	axon development	GO_BiologicalProcess-EBI-UniProt-GOA_24.08.2018_00h00	2.05447e-32	2.59377e-31	2.07658e-40	1.03829e-39	[6, 7, 9, 10, 11]	Group15	27.3632	165	[ACSBG1, ADCY1, ADGRB1, ANK3, APBB1, APC2, ARHGEF7, ARX, ATP6V0A4, ATP8A2, B4GAT1, BMPR2, BRSK1, BRSK2, CACNA1A, CAMSAP2, CDH4, CDK5, CDK5R1, CDKL5, CELSR3, CHL1, CHRNB2, CNR1, COL25A1, CRMP1, CRTAC1, CTNNA2, DAB1, DCC, DCLK1, DCX, DLG4, DLX5, DOK4, DOK5, DPYSL2, DRD2, DSCAM, EFNB3, EPHA3, EPHA5, EPHB1, EVL, FKBP1B, FSTL4, GAP43, GDI1, GFRA2, GPRIN1, GRIN1, INPP5F, ISL1, ISLR2, JAK2, JUN, KCNH8, …
GO:0007409	axonogenesis	GO_BiologicalProcess-EBI-UniProt-GOA_24.08.2018_00h00	8.66844e-30	8.75513e-29	2.07658e-40	1.03829e-39	[6, 7, 8, 9, 10, 11, 12]	Group15	27.4047	151	[ACSBG1, ADCY1, ADGRB1, ANK3, APBB1, APC2, ARHGEF7, ARX, ATP6V0A4, ATP8A2, B4GAT1, BMPR2, BRSK1, BRSK2, CACNA1A, CDH4, CDK5, CDK5R1, CDKL5, CELSR3, CHL1, CHRNB2, COL25A1, CRMP1, CTNNA2, DAB1, DCC, DCLK1, DCX, DLG4, DLX5, DOK4, DOK5, DPYSL2, DRD2, DSCAM, EFNB3, EPHA3, EPHA5, EPHB1, EVL, FSTL4, GAP43, GDI1, GFRA2, GPRIN1, GRIN1, ISL1, ISLR2, KCNH8, KIF5A, KIF5C, KLF7, L1CAM, LGI1, LHX1, LINGO1, LRF…
GO:0030516	regulation of axon extension	GO_BiologicalProcess-EBI-UniProt-GOA_24.08.2018_00h00	2.0996e-09	3.02943e-09	2.07658e-40	1.03829e-39	[4, 5, 6, 7, 8, 9, 10, 11, 12, 13, 14]	Group15	32.0388	33	[APC2, BMPR2, CDH4, CDK5, CDK5R1, CDKL5, DPYSL2, DSCAM, GDI1, ISLR2, L1CAM, MAP1B, MAP3K13, MAPT, NELL1, NRP1, NTRK3, OLFM1, OPTN, PLXNA2, PLXNA3, PLXNA4, RTN4, RTN4R, RUFY3, SEMA3A, SEMA4F, SEMA7A, TET2, TNR, TRIM46, TRPC5, TRPV2]
GO:0048675	axon extension	GO_BiologicalProcess-EBI-UniProt-GOA_24.08.2018_00h00	1.6275e-11	3.10146e-11	2.07658e-40	1.03829e-39	[5, 6, 7, 8, 9, 10, 11, 12, 13]	Group15	30.9859	44	[ACSBG1, APC2, BMPR2, CDH4, CDK5, CDK5R1, CDKL5, DCLK1, DCX, DPYSL2, DSCAM, GDI1, ISLR2, L1CAM, MAP1B, MAP3K13, MAPT, NELL1, NRP1, NRP2, NTRK3, OLFM1, OPTN, PLXNA2, PLXNA3, PLXNA4, PPP3CB, RAPH1, RTN4, RTN4R, RUFY3, SEMA3A, SEMA4F, SEMA7A, SLC9A6, SLC9A7, SLIT1, SLIT3, TET2, TNR, TRIM46, TRPC5, TRPV2, ULK2]
GO:0045773	positive regulation of axon extension	GO_BiologicalProcess-EBI-UniProt-GOA_24.08.2018_00h00	1.67918e-07	2.29185e-07	2.07658e-40	1.03829e-39	[4, 5, 6, 7, 8, 9, 10, 11, 12, 13, 14, 15]	Group15	36.2069	21	[APC2, BMPR2, CDH4, CDKL5, DSCAM, GDI1, ISLR2, L1CAM, MAP1B, MAP3K13, MAPT, NELL1, NRP1, NTRK3, OPTN, RUFY3, SEMA3A, SEMA7A, TET2, TRPC5, TRPV2]
GO:0050770	regulation of axonogenesis	GO_BiologicalProcess-EBI-UniProt-GOA_24.08.2018_00h00	3.61645e-15	1.10685e-14	2.07658e-40	1.03829e-39	[6, 7, 8, 9, 10, 11, 12, 13]	Group15	29.7674	64	[APC2, ARHGEF7, BMPR2, BRSK1, BRSK2, CACNA1A, CDH4, CDK5, CDK5R1, CDKL5, DAB1, DCC, DPYSL2, DSCAM, EFNB3, FSTL4, GDI1, GPRIN1, GRIN1, ISLR2, L1CAM, LINGO1, LRRC4C, MAP1B, MAP3K13, MAPT, MCF2, MYCBP2, NEFL, NELL1, NR4A3, NRP1, NTRK2, NTRK3, OLFM1, OPTN, PAK3, PAM, PLXNA2, PLXNA3, PLXNA4, PLXNC1, PTPRO, RASGRF1, RET, ROBO1, ROBO2, RTN4, RTN4R, RUFY3, SEMA3A, SEMA4F, SEMA7A, SLC9A3R2, SLITRK1, TBR1,…
GO:0050771	negative regulation of axonogenesis	GO_BiologicalProcess-EBI-UniProt-GOA_24.08.2018_00h00	3.61271e-06	4.09982e-06	2.07658e-40	1.03829e-39	[5, 6, 7, 8, 9, 10, 11, 12, 13, 14]	Group15	29.1139	23	[CDK5, CDK5R1, DAB1, DCC, EFNB3, FSTL4, GDI1, LINGO1, MCF2, NELL1, NRP1, OPTN, PLXNA3, PTPRO, RTN4, RTN4R, RUFY3, SEMA3A, SEMA4F, THY1, TNR, TRIM46, ULK2]
GO:0050772	positive regulation of axonogenesis	GO_BiologicalProcess-EBI-UniProt-GOA_24.08.2018_00h00	2.82474e-07	3.75394e-07	2.07658e-40	1.03829e-39	[5, 6, 7, 8, 9, 10, 11, 12, 13, 14]	Group15	28.7129	29	[APC2, BMPR2, CDH4, CDKL5, DSCAM, GDI1, ISLR2, L1CAM, MAP1B, MAP3K13, MAPT, NEFL, NELL1, NRP1, NTRK2, NTRK3, OPTN, PLXNC1, ROBO1, ROBO2, RTN4, RUFY3, SEMA3A, SEMA7A, SLC9A3R2, SLITRK1, TET2, TRPC5, TRPV2]
GO:0032414	positive regulation of ion transmembrane transporter activity	GO_BiologicalProcess-EBI-UniProt-GOA_24.08.2018_00h00	9.16602e-07	1.17186e-06	7.72294e-31	2.8961e-30	[4, 5, 6, 7, 8]	Group14	26.7857	30	[ABCB1, ABCC8, ACTN2, AKAP6, AKAP9, ANK2, ANK3, ATP1B1, ATP1B2, CACNA2D1, CACNB2, CACNB3, CACNG4, CAMK2B, CFTR, CRACR2A, FGF14, HAP1, KCNC1, KCNJ11, LRRC55, RELN, RGS9, RHOV, RNF207, RYR2, SNAP91, STAC2, TCAF1, WNK2]
GO:1904064	positive regulation of cation transmembrane transport	GO_BiologicalProcess-EBI-UniProt-GOA_24.08.2018_00h00	4.95747e-05	5.1619e-05	7.72294e-31	2.8961e-30	[5, 6, 7, 8]	Group14	20.8092	36	[ABCC8, ACTN2, AKAP6, AKAP9, ANK2, ANK3, ATP1B1, ATP1B2, CACNA2D1, CACNB2, CACNB3, CACNG4, CAMK2B, CRACR2A, CX3CL1, ERG, FGF14, HAP1, KCNA4, KCNC1, KCNH2, KCNJ11, KCNJ2, KCNMB1, LRRC55, RELN, RGS9, RHOV, RNF207, RYR2, SNAP91, SNCA, STAC2, THY1, TMEFF2, WNK2]
GO:0071805	potassium ion transmembrane transport	GO_BiologicalProcess-EBI-UniProt-GOA_24.08.2018_00h00	6.09613e-18	2.56546e-17	7.72294e-31	2.8961e-30	[3, 8, 9]	Group14	31.5315	70	[ABCB6, ABCC8, ACTN2, AKAP6, AKAP9, ANK2, ANK3, ATP1A3, ATP1B1, ATP1B2, BIN1, CACNA1D, CAV2, CNGA3, CNGB1, DPP10, DPP6, ERG, FHL1, HCN2, HCN3, HCN4, KCNA2, KCNA3, KCNA4, KCNA6, KCNAB1, KCNAB2, KCNB2, KCNC1, KCNC4, KCND2, KCND3, KCNE4, KCNF1, KCNH2, KCNH7, KCNH8, KCNIP1, KCNIP2, KCNIP4, KCNJ11, KCNJ15, KCNJ2, KCNJ3, KCNJ5, KCNJ6, KCNJ9, KCNK3, KCNMA1, KCNMB1, KCNMB2, KCNN3, KCNT1, KCNV1, LRRC55, M…
GO:1901379	regulation of potassium ion transmembrane transport	GO_BiologicalProcess-EBI-UniProt-GOA_24.08.2018_00h00	3.48433e-10	5.49872e-10	7.72294e-31	2.8961e-30	[3, 4, 7, 8, 9, 10]	Group14	34.7826	32	[ABCB6, ABCC8, ACTN2, AKAP6, AKAP9, ANK2, ANK3, ATP1B1, ATP1B2, BIN1, CACNA1D, CAV2, DPP10, DPP6, ERG, FHL1, KCNA4, KCNAB1, KCNAB2, KCNC1, KCNH2, KCNIP1, KCNIP2, KCNIP4, KCNJ2, KCNMB1, LRRC55, NEDD4L, PLCL1, PRNP, RGS4, RNF207]
GO:0043266	regulation of potassium ion transport	GO_BiologicalProcess-EBI-UniProt-GOA_24.08.2018_00h00	3.43428e-10	5.50576e-10	7.72294e-31	2.8961e-30	[6, 7, 8]	Group14	31.6239	37	[ABCB6, ABCC8, ACTN2, ADCYAP1, ADORA1, ADRA2A, AKAP6, AKAP9, ANK2, ANK3, ATP1B1, ATP1B2, BIN1, CACNA1D, CAV2, DPP10, DPP6, DRD2, ERG, FHL1, GCK, KCNA4, KCNAB1, KCNAB2, KCNC1, KCNH2, KCNIP1, KCNIP2, KCNIP4, KCNJ2, KCNMB1, LRRC55, NEDD4L, PLCL1, PRNP, RGS4, RNF207]
GO:2001257	regulation of cation channel activity	GO_BiologicalProcess-EBI-UniProt-GOA_24.08.2018_00h00	6.74139e-12	1.36176e-11	7.72294e-31	2.8961e-30	[6, 7, 8]	Group14	27.7778	55	[ABCC8, ACTN2, AKAP6, ANK2, ANK3, ATP6V0A4, CACNA1A, CACNA2D1, CACNB1, CACNB2, CACNB3, CACNB4, CACNG4, CACNG8, CAMK2B, CAPN1, CAV2, CNIH2, CRACR2A, CRHR1, DLG4, DRD2, FGF12, FGF14, FKBP1B, GNB5, HAP1, HOMER1, HPCA, JPH3, JPH4, KCNAB1, KCNC1, KCNIP2, KCNJ11, LRRC55, MAPK8IP2, MEF2C, MYO5A, NLGN2, NRXN1, OPRL1, OPRM1, PDE4D, PLP2, PRKCA, RASGRF1, RELN, REM2, RGS9, RNF207, SHISA9, SLA, SNAP91, STAC2]
GO:2001259	positive regulation of cation channel activity	GO_BiologicalProcess-EBI-UniProt-GOA_24.08.2018_00h00	5.27408e-05	5.43553e-05	7.72294e-31	2.8961e-30	[5, 6, 7, 8, 9]	Group14	26.25	21	[ABCC8, ACTN2, AKAP6, ANK2, ANK3, CACNA2D1, CACNB2, CACNB3, CACNG4, CAMK2B, CRACR2A, FGF14, HAP1, KCNC1, KCNJ11, LRRC55, RELN, RGS9, RNF207, SNAP91, STAC2]
GO:1901019	regulation of calcium ion transmembrane transporter activity	GO_BiologicalProcess-EBI-UniProt-GOA_24.08.2018_00h00	8.08339e-06	8.97168e-06	7.72294e-31	2.8961e-30	[6, 7, 8, 9, 10, 11]	Group14	25.2174	29	[ADRA2A, AKAP6, ANK2, ATP1B1, CACNA1A, CACNA2D1, CACNB1, CACNB2, CACNB3, CACNB4, CAMK2B, CRACR2A, CRHR1, DRD2, FGF14, FKBP1B, GNB5, HAP1, HPCA, JPH3, JPH4, MYO5A, OPRL1, PDE4D, PRKCA, REM2, RYR2, SNAP91, STAC2]
GO:1903169	regulation of calcium ion transmembrane transport	GO_BiologicalProcess-EBI-UniProt-GOA_24.08.2018_00h00	2.72423e-06	3.27557e-06	7.72294e-31	2.8961e-30	[7, 8, 9, 10]	Group14	21.5686	44	[ABCB6, ADRA2A, AKAP6, ANK2, ATP1B1, BIN1, CACNA1A, CACNA1C, CACNA2D1, CACNB1, CACNB2, CACNB3, CACNB4, CAMK2B, CORO1A, CRACR2A, CRHR1, CX3CL1, DRD2, FGF14, FKBP1B, GNB5, HAP1, HPCA, JPH3, JPH4, MYO5A, OPRL1, PDE4D, PLCL1, PRKCA, PRKCE, PRNP, REM2, RYR2, SLC8A1, SNAP91, SNCA, STAC2, THY1, TMC2, TMEFF2, TSPAN13, UBASH3B]
GO:0016358	dendrite development	GO_BiologicalProcess-EBI-UniProt-GOA_24.08.2018_00h00	1.53169e-14	3.9667e-14	2.32414e-28	5.81035e-28	[3, 6, 7, 9, 10, 11]	Group10	26.087	78	[ADGRB3, APC2, ARF4, ARHGAP44, ARHGEF7, ATP6V0A4, BMP5, CACNA1A, CAMK1D, CAMK2A, CAMK2B, CAMSAP2, CDK5, CDK5R1, CDKL5, CHRNB2, CPEB3, CRMP1, CSMD3, CTNNA2, CTNND2, CUX2, DAB1, DCC, DCLK1, DCX, DLG4, DNM3, DSCAM, ELAVL4, EPHB1, FSTL4, GPRIN1, GRIN1, GRIN3A, KALRN, KCNH8, KIAA0319, KIDINS220, KLF7, KLHL1, LRP8, LZTS3, MAGI2, MAP1B, MAP6, MAPK8IP2, MCF2, MEF2C, NELL1, NEURL1, NRP1, OPTN, PACSIN1, PA…
GO:0060996	dendritic spine development	GO_BiologicalProcess-EBI-UniProt-GOA_24.08.2018_00h00	2.78757e-06	3.31229e-06	2.32414e-28	5.81035e-28	[3, 4, 7, 8, 10, 11, 12]	Group10	25	32	[ARF4, ARHGAP44, ARHGEF7, CAMK2A, CAMK2B, CDK5, CDK5R1, CDKL5, CPEB3, CRMP1, CTNND2, CUX2, DLG4, DNM3, EPHB1, FSTL4, KALRN, KCNH8, LRP8, LZTS3, MEF2C, NEURL1, PAK3, PLK2, RELN, SLC12A5, SLC9A6, SLC9A7, SRCIN1, TET2, WNT7A, ZNF365]
GO:0048813	dendrite morphogenesis	GO_BiologicalProcess-EBI-UniProt-GOA_24.08.2018_00h00	1.92993e-11	3.54406e-11	2.32414e-28	5.81035e-28	[4, 6, 7, 8, 9, 10, 11, 12]	Group10	27.957	52	[ADGRB3, APC2, ARHGAP44, ARHGEF7, CACNA1A, CAMK2A, CAMK2B, CDK5, CDK5R1, CDKL5, CHRNB2, CRMP1, CTNNA2, CTNND2, CUX2, DCLK1, DCX, DLG4, DNM3, DSCAM, ELAVL4, EPHB1, GPRIN1, GRIN1, KALRN, KCNH8, KIDINS220, KLF7, LRP8, LZTS3, MAP6, MAPK8IP2, NELL1, NRP1, OPTN, PAK3, PARP6, RAPGEF2, RBFOX2, RELN, RERE, SEMA3A, SLITRK5, SNAP91, SRCIN1, TET2, TNIK, TRPC5, VLDLR, WNT7A, YWHAH, ZNF365]
GO:0010975	regulation of neuron projection development	GO_BiologicalProcess-EBI-UniProt-GOA_24.08.2018_00h00	5.0495e-24	3.64286e-23	2.32414e-28	5.81035e-28	[6, 7, 8, 9, 10, 11]	Group10	24.7475	147	[ACAP3, ADCYAP1, ADGRB3, APBB1, APC2, ARHGAP44, ARHGEF7, ATP8A2, BMP5, BMPR2, BRSK1, BRSK2, CA8, CACNA1A, CAMK1D, CAMK2B, CAMSAP2, CDH4, CDK5, CDK5R1, CDKL5, CHODL, CHRNB2, CNR1, CNTN1, CPEB3, CPNE5, CPNE6, CRMP1, CSMD3, CUX2, CX3CL1, DAB1, DCC, DGKE, DLG4, DNM3, DPYSL2, DSCAM, DUSP26, EFNB3, EPHA3, EPHA5, FKBP1B, FSTL4, GDI1, GPRIN1, GRID2, GRIN1, INPP5F, INPP5J, ISLR2, ITGA3, KALRN, KIAA0319, K…
GO:0060997	dendritic spine morphogenesis	GO_BiologicalProcess-EBI-UniProt-GOA_24.08.2018_00h00	2.8388e-05	3.083e-05	2.32414e-28	5.81035e-28	[4, 5, 6, 7, 8, 9, 10, 11, 12, 13]	Group10	27.2727	21	[ARHGAP44, ARHGEF7, CAMK2B, CDK5, CDK5R1, CRMP1, CTNND2, CUX2, DLG4, DNM3, EPHB1, KALRN, KCNH8, LRP8, LZTS3, PAK3, RELN, SRCIN1, TET2, WNT7A, ZNF365]
GO:0050773	regulation of dendrite development	GO_BiologicalProcess-EBI-UniProt-GOA_24.08.2018_00h00	5.482e-07	7.09848e-07	2.32414e-28	5.81035e-28	[4, 7, 8, 9, 10, 11, 12]	Group10	23.5632	41	[ADGRB3, APC2, ARHGAP44, ARHGEF7, BMP5, CAMK1D, CAMK2B, CAMSAP2, CDK5, CDK5R1, CDKL5, CHRNB2, CPEB3, CRMP1, CSMD3, CUX2, DCC, DNM3, FSTL4, GPRIN1, GRIN1, KALRN, KIAA0319, LRP8, LZTS3, MAGI2, MEF2C, NEURL1, PACSIN1, PAK3, PARP6, PLK2, RAPGEF2, RELN, SEZ6, SRCIN1, TET2, TNIK, TRPC5, VLDLR, YWHAH]
GO:0048814	regulation of dendrite morphogenesis	GO_BiologicalProcess-EBI-UniProt-GOA_24.08.2018_00h00	3.4249e-05	3.6412e-05	2.32414e-28	5.81035e-28	[5, 6, 7, 8, 9, 10, 11, 12, 13]	Group10	24.5283	26	[ADGRB3, APC2, ARHGAP44, ARHGEF7, CAMK2B, CDK5, CDK5R1, CDKL5, CHRNB2, CRMP1, CUX2, DNM3, GPRIN1, GRIN1, KALRN, LRP8, LZTS3, PAK3, PARP6, RAPGEF2, RELN, SRCIN1, TET2, TNIK, TRPC5, YWHAH]
GO:0007269	neurotransmitter secretion	GO_BiologicalProcess-EBI-UniProt-GOA_24.08.2018_00h00	1.04097e-22	7.00919e-22	3.66596e-18	7.85563e-18	[4, 5, 6, 7, 8]	Group11	36.3184	73	[ADCY1, ADRA1A, APBA1, ASIC1, BAIAP3, BRSK1, BRSK2, CACNA1A, CADPS, CAMK2A, CDK5, CHRM2, CHRNA4, CHRNB2, CPLX2, CRMP1, DGKI, DOC2A, DOC2B, DRD2, ERC2, FBXL2, GRIK2, HRH3, KCNC4, LIN7A, LIN7B, MEF2C, NAPB, NCS1, NRN1, NRXN1, NRXN2, NRXN3, POU2F2, PPFIA2, PPFIA3, PTPRN2, RAB3A, RIMS1, RIMS3, RIMS4, RPH3A, SEPT5, SH2D3C, SLC32A1, SNAP25, SNAP91, SNCA, SNCG, SNPH, STX1A, STX1B, STXBP1, STXBP5L, SUCO,…
GO:1902803	regulation of synaptic vesicle transport	GO_BiologicalProcess-EBI-UniProt-GOA_24.08.2018_00h00	4.90385e-10	7.39237e-10	3.66596e-18	7.85563e-18	[4, 5, 6, 7, 8]	Group11	33.6735	33	[ADCY1, ADRA1A, APBA1, CAMK2A, CHRM2, CHRNA4, CHRNB2, CNIH2, CPLX2, CRMP1, DRD2, FBXL2, GRIK2, NAPB, NCS1, NRN1, NRXN3, PPFIA2, RAB3A, RIMS1, RIMS3, RIMS4, SEPT5, SNAP91, STX1A, STX1B, STXBP1, STXBP5L, SYN1, SYP, SYT1, SYT7, WNT7A]
GO:0046928	regulation of neurotransmitter secretion	GO_BiologicalProcess-EBI-UniProt-GOA_24.08.2018_00h00	3.60992e-13	8.28641e-13	3.66596e-18	7.85563e-18	[4, 5, 6, 7, 8, 9]	Group11	35.2941	42	[ADCY1, ADRA1A, APBA1, ASIC1, BAIAP3, CACNA1A, CAMK2A, CHRM2, CHRNA4, CHRNB2, CPLX2, CRMP1, DRD2, FBXL2, GRIK2, KCNC4, MEF2C, NAPB, NCS1, NRN1, NRXN3, PPFIA2, RAB3A, RIMS1, RIMS3, RIMS4, SEPT5, SNAP91, SNCA, SNCG, STX1A, STX1B, STXBP1, STXBP5L, SYN1, SYP, SYT1, SYT11, SYT4, SYT7, UNC13A, WNT7A]
GO:1903305	regulation of regulated secretory pathway	GO_BiologicalProcess-EBI-UniProt-GOA_24.08.2018_00h00	1.86178e-10	3.08263e-10	3.66596e-18	7.85563e-18	[5, 6, 7, 8]	Group11	26.7016	51	[ADCY1, ADRA1A, ADRA2A, APBA1, BAIAP3, CACNA1A, CACNA1G, CACNA1I, CAMK2A, CDK5, CHRM2, CHRNA4, CHRNB2, CPLX2, CRMP1, DOC2A, DOC2B, DRD2, FBXL2, GRIK2, MICAL1, NAPB, NCS1, NRN1, NRXN3, PPFIA2, RAB15, RAB3A, RIMS1, RIMS3, RIMS4, RPH3A, SCAMP5, SEPT5, SNAP91, STX1A, STX1B, STXBP1, STXBP5L, SUCO, SYN1, SYP, SYT1, SYT11, SYT13, SYT4, SYT5, SYT6, SYT7, TRIM9, WNT7A]
GO:0017156	calcium ion regulated exocytosis	GO_BiologicalProcess-EBI-UniProt-GOA_24.08.2018_00h00	6.84125e-18	2.76386e-17	3.66596e-18	7.85563e-18	[5, 7, 8]	Group11	34.0659	62	[ADCY1, ADRA1A, ADRA2A, APBA1, BAIAP3, CACNA1A, CACNA1G, CACNA1I, CADPS, CAMK2A, CDK5, CHRM2, CHRNA4, CHRNB2, CPLX2, CRMP1, DOC2A, DOC2B, DRD2, ERC2, FBXL2, GRIK2, NAPB, NCS1, NRN1, NRXN3, PPFIA2, PPFIA3, PPP3CB, RAB3A, RAPGEF4, RHOV, RIMS1, RIMS3, RIMS4, RPH3A, SCAMP5, SCIN, SEPT5, SNAP25, SNAP91, SNPH, STX1A, STX1B, STXBP1, STXBP5L, SUCO, SV2A, SYN1, SYNJ1, SYP, SYT1, SYT11, SYT13, SYT4, SYT5, …
GO:0016079	synaptic vesicle exocytosis	GO_BiologicalProcess-EBI-UniProt-GOA_24.08.2018_00h00	1.47293e-16	5.12986e-16	3.66596e-18	7.85563e-18	[5, 6, 7, 8, 9]	Group11	35.8108	53	[ADCY1, ADRA1A, APBA1, CACNA1A, CADPS, CAMK2A, CDK5, CHRM2, CHRNA4, CHRNB2, CPLX2, CRMP1, DOC2A, DOC2B, DRD2, ERC2, FBXL2, GRIK2, NAPB, NCS1, NRN1, NRXN3, PPFIA2, PPFIA3, RAB3A, RIMS1, RIMS3, RIMS4, RPH3A, SEPT5, SNAP25, SNAP91, SNPH, STX1A, STX1B, STXBP1, STXBP5L, SUCO, SV2A, SYN1, SYNJ1, SYP, SYT1, SYT11, SYT13, SYT4, SYT5, SYT6, SYT7, TRIM9, UNC13A, UNC13C, WNT7A]
GO:0017158	regulation of calcium ion-dependent exocytosis	GO_BiologicalProcess-EBI-UniProt-GOA_24.08.2018_00h00	1.10009e-15	3.47215e-15	3.66596e-18	7.85563e-18	[6, 7, 8, 9]	Group11	36.2963	49	[ADCY1, ADRA1A, ADRA2A, APBA1, BAIAP3, CACNA1A, CACNA1G, CACNA1I, CAMK2A, CDK5, CHRM2, CHRNA4, CHRNB2, CPLX2, CRMP1, DOC2A, DOC2B, DRD2, FBXL2, GRIK2, NAPB, NCS1, NRN1, NRXN3, PPFIA2, RAB3A, RIMS1, RIMS3, RIMS4, RPH3A, SCAMP5, SEPT5, SNAP91, STX1A, STX1B, STXBP1, STXBP5L, SUCO, SYN1, SYP, SYT1, SYT11, SYT13, SYT4, SYT5, SYT6, SYT7, TRIM9, WNT7A]
GO:0051966	regulation of synaptic transmission, glutamatergic	GO_BiologicalProcess-EBI-UniProt-GOA_24.08.2018_00h00	4.80645e-11	8.5167e-11	3.94386e-15	6.57311e-15	[5, 6, 7, 8, 9]	Group02	38.961	30	[ADCYAP1, ADORA1, CDK5, CNR1, DGKI, DRD2, GRIK1, GRIK2, GRIK3, GRM1, GRM2, GRM5, GRM7, GRM8, HOMER1, KALRN, MAPK8IP2, MEF2C, NLGN2, NRXN1, PCDHA4, RELN, SCN9A, SERPINE2, SHANK2, STXBP1, SYT1, TNR, TSHZ3, UNC13A]
GO:0035249	synaptic transmission, glutamatergic	GO_BiologicalProcess-EBI-UniProt-GOA_24.08.2018_00h00	3.94386e-15	1.17156e-14	3.94386e-15	6.57311e-15	[7, 8]	Group02	40.1961	41	[ADCYAP1, ADORA1, CACNA1A, CDK5, CLSTN3, CNIH2, CNR1, DGKI, DRD2, GPRIN1, GRIA2, GRID2, GRIK1, GRIK2, GRIK3, GRIN1, GRM1, GRM2, GRM5, GRM7, GRM8, HOMER1, KALRN, MAPK8IP2, MEF2C, MYOZ3, NAPB, NLGN2, NRXN1, PCDHA4, RELN, SCN9A, SERPINE2, SHANK2, SLC17A7, SLC1A4, STXBP1, SYT1, TNR, TSHZ3, UNC13A]
GO:0030900	forebrain development	GO_BiologicalProcess-EBI-UniProt-GOA_24.08.2018_00h00	1.17008e-11	2.27266e-11	7.55027e-14	1.02958e-13	[3, 5, 6, 7, 8]	Group05	20.7392	101	[ADCYAP1, ADGRG1, ALK, ARX, ASH1L, ATAT1, ATP2B2, ATP6V0A4, ATRX, BCAN, C16orf45, CDK5, CDK5R1, CHD5, CHRD, CHRNB2, COL3A1, CRTAC1, DAB1, DCLK1, DCLK2, DCX, DLX1, DLX5, DPYSL2, DRD2, EPHA3, EPHA5, ERBB4, FLI1, FOXP2, GDPD5, GLI1, GNAO1, GPRIN1, GRIN1, HAP1, HOOK3, ISL1, KALRN, KCNC1, KIF1A, KIF3A, KIRREL3, LHX1, LRP8, LZTS1, MAGI2, MFSD2A, MYO1D, NEFL, NELL1, NFIB, NR4A2, NR4A3, NRG3, NRP1, NRP2,…
GO:0021872	forebrain generation of neurons	GO_BiologicalProcess-EBI-UniProt-GOA_24.08.2018_00h00	3.00023e-05	3.22365e-05	7.55027e-14	1.02958e-13	[4, 6, 7, 8, 9]	Group05	26.506	22	[ARX, ASH1L, DCLK2, DCX, DLX1, DLX5, DRD2, ERBB4, NELL1, NRP1, NRP2, NUMBL, OPTN, PLXNA3, RAC3, RAPGEF2, ROBO1, ROBO2, SEMA3A, SLC4A10, TBR1, UNCX]
GO:0021953	central nervous system neuron differentiation	GO_BiologicalProcess-EBI-UniProt-GOA_24.08.2018_00h00	4.45465e-10	6.81696e-10	7.55027e-14	1.02958e-13	[5, 6, 7, 8, 9]	Group05	24.6809	58	[ARX, ASH1L, CACNA1A, CBLN1, CDK5, CEND1, CHD5, CHRNB2, DCC, DCLK1, DCLK2, DCX, DLX1, DLX5, DRD2, EPHB1, ERBB4, FAIM2, GABRB1, GDPD5, GRID2, HERC1, ISL1, KALRN, KCNH8, LHX1, MAPT, MDGA1, MDGA2, MYCBP2, NELL1, NFIB, NR4A2, NRP1, NRP2, NRXN1, NTRK2, OPTN, PAM, PCSK1, PLXNA3, PLXNA4, RAC3, RAPGEF2, RASGRF1, ROBO1, ROBO2, SEMA3A, SLC4A10, SLC9A3R2, SPOCK1, SPTBN4, TBR1, TET2, UNC5D, UNCX, VIPR1, WNT7…
GO:0021954	central nervous system neuron development	GO_BiologicalProcess-EBI-UniProt-GOA_24.08.2018_00h00	1.50033e-10	2.56836e-10	7.55027e-14	1.02958e-13	[5, 6, 7, 8, 9, 10]	Group05	33.6538	35	[ARX, ASH1L, CDK5, CHRNB2, DCC, DCLK1, DCLK2, DCX, DRD2, EPHB1, GABRB1, KCNH8, MAPT, MYCBP2, NELL1, NFIB, NR4A2, NRP1, NRP2, NTRK2, OPTN, PAM, PCSK1, PLXNA3, PLXNA4, RAC3, RAPGEF2, RASGRF1, ROBO1, ROBO2, SEMA3A, SLC4A10, SLC9A3R2, SPTBN4, TET2]
GO:0030900	forebrain development	GO_BiologicalProcess-EBI-UniProt-GOA_24.08.2018_00h00	1.17008e-11	2.27266e-11	7.55027e-14	1.02958e-13	[3, 5, 6, 7, 8]	Group12	20.7392	101	[ADCYAP1, ADGRG1, ALK, ARX, ASH1L, ATAT1, ATP2B2, ATP6V0A4, ATRX, BCAN, C16orf45, CDK5, CDK5R1, CHD5, CHRD, CHRNB2, COL3A1, CRTAC1, DAB1, DCLK1, DCLK2, DCX, DLX1, DLX5, DPYSL2, DRD2, EPHA3, EPHA5, ERBB4, FLI1, FOXP2, GDPD5, GLI1, GNAO1, GPRIN1, GRIN1, HAP1, HOOK3, ISL1, KALRN, KCNC1, KIF1A, KIF3A, KIRREL3, LHX1, LRP8, LZTS1, MAGI2, MFSD2A, MYO1D, NEFL, NELL1, NFIB, NR4A2, NR4A3, NRG3, NRP1, NRP2,…
GO:0021537	telencephalon development	GO_BiologicalProcess-EBI-UniProt-GOA_24.08.2018_00h00	2.33331e-10	3.80104e-10	7.55027e-14	1.02958e-13	[3, 4, 6, 7, 8, 9]	Group12	22.5705	72	[ADGRG1, ALK, ARX, ASH1L, ATAT1, ATP2B2, BCAN, C16orf45, CDK5, CDK5R1, COL3A1, CRTAC1, DAB1, DCLK2, DCX, DLX1, DLX5, DPYSL2, DRD2, EPHA3, EPHA5, ERBB4, FOXP2, GPRIN1, GRIN1, KIF3A, KIRREL3, LHX1, LRP8, LZTS1, MAGI2, MFSD2A, NEFL, NELL1, NFIB, NR4A3, NRG3, NRP1, NRP2, NTRK2, NUMBL, OPTN, PAX5, PCSK1, PLXNA3, PLXNA4, PPP1R9B, RELN, ROBO1, ROBO2, RTN4, RTN4R, RTN4RL1, SEMA3A, SEMA7A, SLC1A2, SLC25A4…
GO:0021543	pallium development	GO_BiologicalProcess-EBI-UniProt-GOA_24.08.2018_00h00	3.26928e-07	4.28828e-07	7.55027e-14	1.02958e-13	[3, 4, 5, 7, 8, 9, 10]	Group12	21.9298	50	[ADGRG1, ALK, ARX, ASH1L, ATAT1, ATP2B2, BCAN, C16orf45, CDK5, CDK5R1, COL3A1, DAB1, DCLK2, DCX, DLX1, EPHA3, EPHA5, FOXP2, GPRIN1, GRIN1, KIF3A, KIRREL3, LRP8, LZTS1, MAGI2, MFSD2A, NEFL, NELL1, NR4A3, NRP1, NRP2, NTRK2, OPTN, PAX5, PCSK1, PLXNA3, PPP1R9B, RELN, ROBO1, RTN4, SEMA3A, SLC25A4, SLC32A1, SLC9A3R2, SOCS7, SRD5A1, TACC1, TBR1, TET2, TH]
GO:0021761	limbic system development	GO_BiologicalProcess-EBI-UniProt-GOA_24.08.2018_00h00	1.8215e-06	2.21652e-06	7.55027e-14	1.02958e-13	[4, 5, 6, 7, 8, 9]	Group12	24.1379	35	[ALK, ATAT1, ATP2B2, BCAN, CDK5, CDK5R1, DCLK2, DCX, DLX1, DRD2, EPHA3, EPHA5, FLI1, HAP1, KIF3A, KIRREL3, LRP8, LZTS1, MFSD2A, NEFL, NELL1, NR4A3, NRP1, NRP2, OPTN, PCSK1, PLXNA3, PPP1R9B, RELN, SEMA3A, SLC32A1, SLC9A3R2, SRD5A1, TBR1, TET2]
GO:0021766	hippocampus development	GO_BiologicalProcess-EBI-UniProt-GOA_24.08.2018_00h00	2.82967e-05	3.10649e-05	7.55027e-14	1.02958e-13	[3, 4, 5, 6, 7, 8, 9, 10, 11]	Group12	25	26	[ALK, ATAT1, ATP2B2, BCAN, CDK5, CDK5R1, DCLK2, DCX, DLX1, EPHA3, EPHA5, KIF3A, KIRREL3, LRP8, LZTS1, MFSD2A, NEFL, NR4A3, PCSK1, PLXNA3, PPP1R9B, RELN, SLC32A1, SLC9A3R2, SRD5A1, TET2]
GO:0021953	central nervous system neuron differentiation	GO_BiologicalProcess-EBI-UniProt-GOA_24.08.2018_00h00	4.45465e-10	6.81696e-10	7.55027e-14	1.02958e-13	[5, 6, 7, 8, 9]	Group12	24.6809	58	[ARX, ASH1L, CACNA1A, CBLN1, CDK5, CEND1, CHD5, CHRNB2, DCC, DCLK1, DCLK2, DCX, DLX1, DLX5, DRD2, EPHB1, ERBB4, FAIM2, GABRB1, GDPD5, GRID2, HERC1, ISL1, KALRN, KCNH8, LHX1, MAPT, MDGA1, MDGA2, MYCBP2, NELL1, NFIB, NR4A2, NRP1, NRP2, NRXN1, NTRK2, OPTN, PAM, PCSK1, PLXNA3, PLXNA4, RAC3, RAPGEF2, RASGRF1, ROBO1, ROBO2, SEMA3A, SLC4A10, SLC9A3R2, SPOCK1, SPTBN4, TBR1, TET2, UNC5D, UNCX, VIPR1, WNT7…
GO:0021987	cerebral cortex development	GO_BiologicalProcess-EBI-UniProt-GOA_24.08.2018_00h00	6.01506e-05	6.13658e-05	7.55027e-14	1.02958e-13	[3, 4, 5, 6, 8, 9, 10, 11]	Group12	21.2903	33	[ADGRG1, ARX, ASH1L, C16orf45, CDK5, CDK5R1, COL3A1, DAB1, DCX, FOXP2, GPRIN1, GRIN1, LRP8, MAGI2, NEFL, NELL1, NRP1, NRP2, NTRK2, OPTN, PAX5, PPP1R9B, RELN, ROBO1, RTN4, SEMA3A, SLC25A4, SOCS7, SRD5A1, TACC1, TBR1, TET2, TH]
GO:0022029	telencephalon cell migration	GO_BiologicalProcess-EBI-UniProt-GOA_24.08.2018_00h00	3.76231e-05	3.95826e-05	7.55027e-14	1.02958e-13	[4, 5, 6, 7, 8, 9, 10]	Group12	25.5556	23	[ADGRG1, ARX, C16orf45, CDK5, CDK5R1, DAB1, DCX, DRD2, MAGI2, NELL1, NRG3, NRP1, NRP2, OPTN, RELN, ROBO1, RTN4, SEMA3A, SLIT1, SLIT3, SOCS7, TET2, TNR]
GO:0099565	chemical synaptic transmission, postsynaptic	GO_BiologicalProcess-EBI-UniProt-GOA_24.08.2018_00h00	5.79421e-12	1.2192e-11	5.79421e-12	7.24277e-12	[4, 5, 6, 7, 8]	Group03	32.8125	42	[ABAT, ADORA1, ATP6V0A4, C15orf59, CACNB3, CBLN1, CDK5, CELF4, CHRNA4, CHRNB2, CUX2, DGKI, DLG2, DLG4, DRD2, GLRA2, GLRA4, GPRIN1, GRIA1, GRIA2, GRIA4, GRID2, GRIK2, GRIN1, GRM2, IGSF9B, MAPK8IP2, MEF2C, NLGN2, NPAS4, NRXN1, OPRM1, PLP2, RELN, RGS4, RIMS1, SEZ6, SLC17A7, SNCA, STX1A, STX1B, WNT7A]
GO:0060079	excitatory postsynaptic potential	GO_BiologicalProcess-EBI-UniProt-GOA_24.08.2018_00h00	4.55671e-11	8.21835e-11	5.79421e-12	7.24277e-12	[5, 6, 7, 8, 9]	Group03	32.5	39	[ADORA1, ATP6V0A4, CACNB3, CBLN1, CDK5, CELF4, CHRNA4, CHRNB2, CUX2, DGKI, DLG2, DLG4, DRD2, GLRA2, GLRA4, GPRIN1, GRIA1, GRIA2, GRIA4, GRID2, GRIK2, GRIN1, GRM2, MAPK8IP2, MEF2C, NLGN2, NPAS4, NRXN1, OPRM1, PLP2, RELN, RGS4, RIMS1, SEZ6, SLC17A7, SNCA, STX1A, STX1B, WNT7A]
GO:0008038	neuron recognition	GO_BiologicalProcess-EBI-UniProt-GOA_24.08.2018_00h00	7.60878e-12	1.50684e-11	7.60878e-12	8.77937e-12	[3, 5, 6, 8, 9, 10]	Group01	48.0769	25	[ATP6V0A4, CDK5R1, CELSR3, CNR1, CRTAC1, DSCAM, EFNB3, EPHA3, EPHA5, GAP43, NCAM2, NELL1, NRP1, NT5E, NTM, NTS, OPCML, OPTN, PCDHA4, PLP2, RASGRF1, ROBO1, ROBO2, RTN4, SEMA3A]
GO:0030902	hindbrain development	GO_BiologicalProcess-EBI-UniProt-GOA_24.08.2018_00h00	1.15221e-07	1.61629e-07	1.15221e-07	1.23451e-07	[3, 5, 6, 7, 8]	Group06	23.4694	46	[ABAT, ADCYAP1R1, AIF1, ASH1L, BMP5, CACNA1A, CBLN1, CDK5, CDK5R1, CEND1, CNTN1, CTNNA2, DAB1, FAIM2, FOXC1, FOXP2, GLI1, GPRIN1, GRID2, GRIN1, HAP1, HERC1, KCNC1, KLF6, KLHL1, LHX1, MYO16, NFIB, NRXN1, PLXNA2, RBFOX2, RERE, SCN9A, SERPINE2, SEZ6, SEZ6L, SEZ6L2, SMAD9, SOCS7, SSTR2, TBR1, TRNP1, TTBK2, VIPR1, WNT7A, ZNF365]
GO:0022037	metencephalon development	GO_BiologicalProcess-EBI-UniProt-GOA_24.08.2018_00h00	1.01519e-06	1.26586e-06	1.15221e-07	1.23451e-07	[3, 4, 6, 7, 8, 9]	Group06	24.8227	35	[ABAT, AIF1, ASH1L, CACNA1A, CBLN1, CDK5, CDK5R1, CEND1, CNTN1, DAB1, FAIM2, FOXC1, FOXP2, GLI1, GPRIN1, GRID2, GRIN1, HAP1, HERC1, KCNC1, KLHL1, LHX1, MYO16, NRXN1, RERE, SCN9A, SERPINE2, SEZ6, SEZ6L, SEZ6L2, SSTR2, TRNP1, TTBK2, WNT7A, ZNF365]
GO:0021549	cerebellum development	GO_BiologicalProcess-EBI-UniProt-GOA_24.08.2018_00h00	3.55622e-06	4.08158e-06	1.15221e-07	1.23451e-07	[3, 4, 5, 7, 8, 9, 10]	Group06	24.6154	32	[ABAT, AIF1, CACNA1A, CBLN1, CDK5, CDK5R1, CEND1, CNTN1, DAB1, FAIM2, FOXC1, FOXP2, GLI1, GRID2, HAP1, HERC1, KCNC1, KLHL1, LHX1, MYO16, NRXN1, RERE, SCN9A, SERPINE2, SEZ6, SEZ6L, SEZ6L2, SSTR2, TRNP1, TTBK2, WNT7A, ZNF365]
GO:0021695	cerebellar cortex development	GO_BiologicalProcess-EBI-UniProt-GOA_24.08.2018_00h00	4.3608e-06	4.89378e-06	1.15221e-07	1.23451e-07	[3, 4, 5, 6, 8, 9, 10, 11]	Group06	30.4348	21	[CACNA1A, CBLN1, CDK5, CEND1, FAIM2, GLI1, GRID2, HERC1, KLHL1, LHX1, NRXN1, RERE, SCN9A, SERPINE2, SEZ6, SEZ6L, SEZ6L2, TRNP1, TTBK2, WNT7A, ZNF365]
GO:0050805	negative regulation of synaptic transmission	GO_BiologicalProcess-EBI-UniProt-GOA_24.08.2018_00h00	1.80432e-06	2.2224e-06	1.80432e-06	1.80432e-06	[3, 4, 5, 6, 7, 8, 9]	Group00	28.7356	25	[ACHE, ADORA1, ASIC1, CBLN1, CELF4, DGKI, DRD2, GNAI1, GRIA1, GRID2, GRIK2, GRIK3, GRM7, MAPT, PCDH17, PICK1, PLK2, SHANK2, SLC24A2, SNCA, STXBP1, SYT11, SYT4, TNR, ZBTB7C]
GO:0099240	intrinsic component of synaptic membrane	GO_CellularComponent-EBI-UniProt-GOA_24.08.2018_00h00	1.09083e-27	1.00158e-26	1.50615e-55	2.25922e-54	[2, 3, 4, 5, 6, 7, 8]	Group13	38.8626	82	[ADCY1, ADCY8, ADORA1, ADRA1A, ATP2B2, CACNA1D, CACNG4, CADM3, CHRM2, CHRNA4, CHRNB2, CLSTN2, CLSTN3, CNIH2, CNR1, CNTN1, CNTN5, CNTNAP4, DCC, DRD2, EFNB3, ERBB4, GABRA2, GABRA3, GABRA4, GABRA5, GABRB2, GABRG3, GLRA4, GPM6A, GPRIN1, GRIA1, GRID1, GRID2, GRIK2, GRIN1, GRM2, KCNA2, KCNA3, KCNC1, KCND2, KCND3, KCNJ3, KCNJ9, LRFN1, LRFN5, LRRC4B, LRRC4C, LRRN2, LRRTM2, LRRTM4, MYOZ3, NELL1, NLGN2, NP…
GO:0042734	presynaptic membrane	GO_CellularComponent-EBI-UniProt-GOA_24.08.2018_00h00	4.28233e-24	3.32704e-23	1.50615e-55	2.25922e-54	[3, 4, 5, 6, 7, 8]	Group13	38.7978	71	[ADCY8, ADORA1, ADRA1A, APBA1, APBB1, ATP2B2, CACNA1D, CADM3, CAMK2A, CHRM2, CHRNA4, CHRNB2, CNR1, CNTN1, CNTN5, CNTNAP4, CRMP1, CTNNA2, DGKI, DRD2, EFNB3, ERBB4, ERC2, GABBR1, GABRA5, GAD2, GPM6A, GRIK2, GRM1, GRM2, GRM5, GRM7, GRM8, HIP1R, IGSF21, KCNA2, KCNA3, KCNC1, KCNJ3, KCNJ9, KCTD12, KCTD16, KCTD8, KIAA1107, LRRC4B, NLGN2, NPTN, NRXN1, NTNG1, OPRM1, PCDH17, PCDHA4, PDE2A, PICK1, RGS7BP, R…
GO:0045211	postsynaptic membrane	GO_CellularComponent-EBI-UniProt-GOA_24.08.2018_00h00	1.30427e-42	4.39105e-41	1.50615e-55	2.25922e-54	[3, 4, 5, 6, 7, 8]	Group13	36.1538	141	[ACTN2, ADCY1, ADGRB1, ADORA1, ADRA1A, AKAP9, ANK1, ANK2, ANK3, ANKH, ANKS1B, APBB1, ARRB1, CABP1, CACNA1C, CACNG4, CACNG8, CAMK2N1, CBLN1, CDK5, CHRM2, CHRM4, CHRNA4, CHRNB2, CLSTN2, CLSTN3, CNIH2, CNTN1, CPEB3, CPEB4, CRMP1, CTNNA2, DCC, DGKI, DLG2, DLG4, DLGAP2, DLGAP3, DNM3, DPYSL2, DRD2, DRP2, EFNB3, ERBB4, FAIM2, FBLIM1, GABBR1, GABBR2, GABRA2, GABRA3, GABRA4, GABRA5, GABRB1, GABRB2, GABRG2…
GO:0099634	postsynaptic specialization membrane	GO_CellularComponent-EBI-UniProt-GOA_24.08.2018_00h00	3.0625e-17	1.1456e-16	1.50615e-55	2.25922e-54	[2, 3, 4, 5, 6, 7, 8, 9]	Group13	41.0714	46	[ACTN2, ADCY1, AKAP9, CACNG4, CHRNB2, CLSTN2, CLSTN3, CNIH2, DCC, DGKI, DLG4, EFNB3, ERBB4, GABRA2, GABRA3, GABRA4, GABRA5, GABRB2, GLRA4, GPRIN1, GRIA1, GRID1, GRID2, GRIK2, GRIN1, KCND2, KCND3, KSR2, LRFN1, LRFN5, LRRC4B, LRRC4C, LRRN2, LRRTM2, LRRTM4, MYOZ3, NLGN2, NPTN, PLPPR4, PTPRO, PTPRT, RGS7BP, SHISA7, SHISA9, SLITRK1, SLITRK3]
GO:0098889	intrinsic component of presynaptic membrane	GO_CellularComponent-EBI-UniProt-GOA_24.08.2018_00h00	1.71962e-11	3.21633e-11	1.50615e-55	2.25922e-54	[3, 4, 5, 6, 7, 8, 9]	Group13	35.2941	36	[ADCY8, ADORA1, ADRA1A, ATP2B2, CACNA1D, CADM3, CHRM2, CHRNA4, CHRNB2, CNR1, CNTN1, CNTN5, CNTNAP4, DRD2, EFNB3, ERBB4, GABRA5, GPM6A, GRIK2, KCNA2, KCNA3, KCNC1, KCNJ3, KCNJ9, NPTN, NRXN1, NTNG1, OPRM1, PCDH17, PCDHA4, RGS7BP, SLC1A2, SLC6A13, STX1A, SYT11, SYT7]
GO:0098936	intrinsic component of postsynaptic membrane	GO_CellularComponent-EBI-UniProt-GOA_24.08.2018_00h00	1.94881e-21	1.0935e-20	1.50615e-55	2.25922e-54	[3, 4, 5, 6, 7, 8, 9]	Group13	39.6104	61	[ADCY1, ADORA1, ADRA1A, CACNG4, CHRM2, CHRNB2, CLSTN2, CLSTN3, CNIH2, CNTN1, DCC, DRD2, EFNB3, ERBB4, GABRA2, GABRA3, GABRA4, GABRA5, GABRB2, GLRA4, GPRIN1, GRIA1, GRID1, GRID2, GRIK2, GRIN1, GRM2, KCNA3, KCNC1, KCND2, KCND3, LRFN1, LRFN5, LRRC4B, LRRC4C, LRRN2, LRRTM2, LRRTM4, MYOZ3, NELL1, NLGN2, NPTN, NRP1, NRP2, NTRK3, OPRM1, OPTN, PCDH17, PLPPR4, PTPRO, PTPRT, RGS7BP, SHISA7, SHISA9, SLC6A13…
GO:0098948	intrinsic component of postsynaptic specialization membrane	GO_CellularComponent-EBI-UniProt-GOA_24.08.2018_00h00	3.06241e-16	9.97754e-16	1.50615e-55	2.25922e-54	[2, 3, 4, 5, 6, 7, 8, 9, 10]	Group13	42.7083	41	[ADCY1, CACNG4, CHRNB2, CLSTN2, CLSTN3, CNIH2, DCC, EFNB3, ERBB4, GABRA2, GABRA3, GABRA4, GABRA5, GABRB2, GLRA4, GPRIN1, GRIA1, GRID1, GRID2, GRIK2, GRIN1, KCND2, KCND3, LRFN1, LRFN5, LRRC4B, LRRC4C, LRRN2, LRRTM2, LRRTM4, MYOZ3, NLGN2, NPTN, PLPPR4, PTPRO, PTPRT, RGS7BP, SHISA7, SHISA9, SLITRK1, SLITRK3]
GO:0099699	integral component of synaptic membrane	GO_CellularComponent-EBI-UniProt-GOA_24.08.2018_00h00	3.34893e-27	2.81868e-26	1.50615e-55	2.25922e-54	[3, 4, 5, 6, 7, 8, 9]	Group13	39.7959	78	[ADCY1, ADCY8, ADORA1, ADRA1A, ATP2B2, CACNA1D, CACNG4, CADM3, CHRM2, CHRNA4, CHRNB2, CLSTN2, CLSTN3, CNIH2, CNR1, CNTNAP4, DCC, DRD2, EFNB3, ERBB4, GABRA2, GABRA3, GABRA4, GABRA5, GABRB2, GABRG3, GLRA4, GPM6A, GPRIN1, GRIA1, GRID1, GRID2, GRIK2, GRIN1, GRM2, KCNA2, KCNA3, KCNC1, KCND2, KCND3, KCNJ3, KCNJ9, LRFN1, LRFN5, LRRC4B, LRRC4C, LRRN2, LRRTM2, LRRTM4, MYOZ3, NELL1, NLGN2, NPTN, NRP1, NRP2…
GO:0098839	postsynaptic density membrane	GO_CellularComponent-EBI-UniProt-GOA_24.08.2018_00h00	1.11215e-13	2.73969e-13	1.50615e-55	2.25922e-54	[3, 4, 5, 6, 7, 8, 9, 10]	Group13	41.6667	35	[ACTN2, ADCY1, AKAP9, CACNG4, CLSTN2, CLSTN3, CNIH2, DCC, DGKI, DLG4, EFNB3, ERBB4, GPRIN1, GRIA1, GRID1, GRID2, GRIK2, GRIN1, KSR2, LRFN1, LRFN5, LRRC4B, LRRC4C, LRRN2, LRRTM2, LRRTM4, MYOZ3, NPTN, PLPPR4, PTPRO, PTPRT, RGS7BP, SHISA9, SLITRK1, SLITRK3]
GO:0099055	integral component of postsynaptic membrane	GO_CellularComponent-EBI-UniProt-GOA_24.08.2018_00h00	4.05614e-21	1.95081e-20	1.50615e-55	2.25922e-54	[4, 5, 6, 7, 8, 9, 10]	Group13	40.1361	59	[ADCY1, ADORA1, ADRA1A, CACNG4, CHRM2, CHRNB2, CLSTN2, CLSTN3, CNIH2, DCC, DRD2, EFNB3, ERBB4, GABRA2, GABRA3, GABRA4, GABRA5, GABRB2, GLRA4, GPRIN1, GRIA1, GRID1, GRID2, GRIK2, GRIN1, GRM2, KCNA3, KCNC1, KCND2, KCND3, LRFN1, LRFN5, LRRC4B, LRRC4C, LRRN2, LRRTM2, LRRTM4, MYOZ3, NELL1, NLGN2, NPTN, NRP1, NRP2, NTRK3, OPRM1, OPTN, PCDH17, PLPPR4, PTPRO, PTPRT, SHISA7, SHISA9, SLC6A13, SLC6A6, SLC8A…
GO:0099056	integral component of presynaptic membrane	GO_CellularComponent-EBI-UniProt-GOA_24.08.2018_00h00	3.48433e-10	5.49872e-10	1.50615e-55	2.25922e-54	[4, 5, 6, 7, 8, 9, 10]	Group13	34.7826	32	[ADCY8, ADORA1, ADRA1A, ATP2B2, CACNA1D, CADM3, CHRM2, CHRNA4, CHRNB2, CNR1, CNTNAP4, DRD2, EFNB3, ERBB4, GABRA5, GPM6A, GRIK2, KCNA2, KCNA3, KCNC1, KCNJ3, KCNJ9, NPTN, NRXN1, OPRM1, PCDH17, PCDHA4, SLC1A2, SLC6A13, STX1A, SYT11, SYT7]
GO:0099146	intrinsic component of postsynaptic density membrane	GO_CellularComponent-EBI-UniProt-GOA_24.08.2018_00h00	6.30184e-12	1.29895e-11	1.50615e-55	2.25922e-54	[3, 4, 5, 6, 7, 8, 9, 10, 11]	Group13	41.6667	30	[ADCY1, CACNG4, CLSTN2, CLSTN3, CNIH2, DCC, EFNB3, ERBB4, GPRIN1, GRIA1, GRID1, GRID2, GRIK2, GRIN1, LRFN1, LRFN5, LRRC4B, LRRC4C, LRRN2, LRRTM2, LRRTM4, MYOZ3, NPTN, PLPPR4, PTPRO, PTPRT, RGS7BP, SHISA9, SLITRK1, SLITRK3]
GO:0008076	voltage-gated potassium channel complex	GO_CellularComponent-EBI-UniProt-GOA_24.08.2018_00h00	1.74241e-12	3.91074e-12	7.72294e-31	2.8961e-30	[4, 5, 6, 7, 8, 9]	Group14	37	37	[AKAP9, CAMK2B, DLG2, DLG4, DPP10, DPP6, ERG, HCN2, HCN4, KCNA2, KCNA3, KCNA4, KCNA6, KCNAB1, KCNAB2, KCNB2, KCNC1, KCNC4, KCND2, KCND3, KCNF1, KCNH2, KCNIP1, KCNIP2, KCNIP4, KCNJ2, KCNJ3, KCNJ5, KCNJ6, KCNMA1, KCNMB1, KCNMB2, KCNT1, KCNV1, LRRC55, SNAP25, STX1A]
GO:0034705	potassium channel complex	GO_CellularComponent-EBI-UniProt-GOA_24.08.2018_00h00	2.12557e-13	5.1115e-13	7.72294e-31	2.8961e-30	[6, 7, 8]	Group14	37.037	40	[ABCC8, AKAP9, CAMK2B, DLG2, DLG4, DPP10, DPP6, ERG, GRIK2, HCN2, HCN4, KCNA2, KCNA3, KCNA4, KCNA6, KCNAB1, KCNAB2, KCNB2, KCNC1, KCNC4, KCND2, KCND3, KCNF1, KCNH2, KCNIP1, KCNIP2, KCNIP4, KCNJ11, KCNJ2, KCNJ3, KCNJ5, KCNJ6, KCNMA1, KCNMB1, KCNMB2, KCNT1, KCNV1, LRRC55, SNAP25, STX1A]
GO:0030426	growth cone	GO_CellularComponent-EBI-UniProt-GOA_24.08.2018_00h00	8.59528e-15	2.41145e-14	5.60615e-30	1.68184e-29	[3, 4, 5, 6, 7, 8, 9]	Group07	29.0179	65	[ACAP3, APBB1, ATP6V0A4, BASP1, CDK5, CDK5R1, CDKL5, CNR1, CPEB4, CRMP1, CRTAC1, DPYSL2, DSCAM, ERC2, EXOC8, GAP43, GDPD5, GPM6A, GPRIN1, INPP5J, ITGA3, KIF21B, KIF5C, KLC1, L1CAM, LZTS1, MAPK8IP1, MAPT, MPP3, MYO5A, NDRG2, NEFL, NELL1, NR1I3, NRP1, NRSN1, NRXN1, OLFM1, OPTN, PCDH9, PCDHA4, PLP2, PPP1R9B, PTPRO, RAC3, RASGRF1, RTN4, RTN4R, RUFY3, SHANK2, SIRT2, SNAP25, SNAP91, SNCA, STMN2, STMN3,…
GO:0043679	axon terminus	GO_CellularComponent-EBI-UniProt-GOA_24.08.2018_00h00	1.50533e-16	5.06796e-16	5.60615e-30	1.68184e-29	[3, 4, 5, 6, 7, 8, 9]	Group07	37.3134	50	[AAK1, ADCYAP1, ADORA1, CALB1, CHRM2, CNGB1, CPLX2, DFFB, DGKI, DPYSL2, DRD2, GAD1, GNRH1, GPRIN1, GRIK2, GRIK3, GRIN1, GRM7, HCN3, KCNA2, KCNA3, KCNA6, KCNAB2, KCNC1, KCNC4, KCNH8, MICAL1, NCS1, NTRK2, NTS, PACSIN1, PENK, PNOC, PTPRN, PTPRN2, RAB3A, SEPT6, SEPT8, SLC32A1, SLC9A6, SLC9A7, SNCA, SYNJ1, SYP, SYT11, SYT7, TBC1D24, TH, UNC13A, UNC13C]
GO:0150034	distal axon	GO_CellularComponent-EBI-UniProt-GOA_24.08.2018_00h00	5.60615e-30	6.29134e-29	5.60615e-30	1.68184e-29	[4, 5, 6, 7, 8]	Group07	32.6648	114	[AAK1, ACAP3, ADCYAP1, ADORA1, APBB1, ATP6V0A4, BASP1, BRSK1, BRSK2, CALB1, CDK5, CDK5R1, CDKL5, CHRM2, CNGB1, CNR1, CPEB4, CPLX2, CRMP1, CRTAC1, DFFB, DGKI, DPYSL2, DRD2, DSCAM, ERC2, EXOC8, GAD1, GAP43, GDPD5, GNRH1, GPM6A, GPRIN1, GRIK2, GRIK3, GRIN1, GRM7, HCN3, INPP5J, ITGA3, KCNA2, KCNA3, KCNA6, KCNAB2, KCNC1, KCNC4, KCNH8, KIF21B, KIF5C, KLC1, L1CAM, LZTS1, MAPK8IP1, MAPT, MICAL1, MPP3, MY…
GO:0043195	terminal bouton	GO_CellularComponent-EBI-UniProt-GOA_24.08.2018_00h00	4.29939e-10	6.68059e-10	5.60615e-30	1.68184e-29	[3, 4, 5, 6, 7, 8, 9, 10]	Group07	44.2308	23	[AAK1, ADCYAP1, ADORA1, CNGB1, DFFB, DPYSL2, GPRIN1, GRIK2, GRIK3, GRIN1, GRM7, MICAL1, NTRK2, PTPRN2, RAB3A, SNCA, SYNJ1, SYP, SYT11, TBC1D24, TH, UNC13A, UNC13C]
GO:0030133	transport vesicle	GO_CellularComponent-EBI-UniProt-GOA_24.08.2018_00h00	8.06955e-17	2.9108e-16	8.06955e-17	1.51304e-16	[3, 4, 5, 6, 7, 8]	Group09	23.956	109	[ABCC8, APBA1, ARFGEF3, ATP13A2, ATP6V1G2, BGN, BRSK1, BRSK2, C1QTNF5, CAV2, CHGA, CLTCL1, CNIH2, CPA4, CPE, CRISPLD2, CRMP1, DBNDD1, DDC, DGKI, DLG4, DOC2A, DOC2B, DRD2, ECE2, FBLIM1, GABRA2, GAD2, GALNT14, GALNT15, GNAO1, GPRIN1, GRIA1, GRIN1, HAP1, HLA-B, KIAA1107, KIF1A, MAL2, MAP6, MBP, MYRIP, NPTX1, NR4A2, NRSN1, NTS, OVGP1, PCSK1, PENK, PRKCB, PTPRN, PTPRN2, RAB1A, RAB26, RAB27B, RAB3A, RA…
GO:0008021	synaptic vesicle	GO_CellularComponent-EBI-UniProt-GOA_24.08.2018_00h00	6.02093e-20	2.76416e-19	8.06955e-17	1.51304e-16	[2, 3, 4, 5, 6, 7, 8, 9, 10]	Group09	33.6493	71	[ABCC8, APBA1, ATP6V1G2, BRSK1, BRSK2, CRMP1, DBNDD1, DDC, DGKI, DLG4, DOC2A, DRD2, GABRA2, GAD2, GPRIN1, GRIA1, GRIN1, HAP1, KIAA1107, KIF1A, MAL2, NR4A2, PENK, PRKCB, PTPRN, PTPRN2, RAB26, RAB27B, RAB3A, RAB3B, RAB3C, RNF112, RPH3A, SCAMP1, SCAMP5, SEPT5, SEPT6, SEPT8, SH3GL2, SLC17A5, SLC17A6, SLC17A7, SLC32A1, SLC6A17, SNAP25, SNAP91, SNCA, STX1A, STX1B, STXBP5, SV2A, SV2C, SVOP, SYN1, SYN2, …
GO:0030658	transport vesicle membrane	GO_CellularComponent-EBI-UniProt-GOA_24.08.2018_00h00	2.10793e-12	4.62827e-12	8.06955e-17	1.51304e-16	[3, 4, 5, 6, 7, 8, 9, 10]	Group09	26.4706	63	[ABCC8, ARFGEF3, ATP6V1G2, CHGA, CLTCL1, CNIH2, CPE, CRMP1, DBNDD1, DOC2A, DRD2, ECE2, GABRA2, GAD2, GNAO1, GRIA1, HLA-B, MAL2, MAP6, PTPRN, PTPRN2, RAB1A, RAB26, RAB27B, RAB3A, RAB3B, RAB3C, RPH3A, SAR1B, SCAMP1, SCAMP5, SCG3, SCGN, SEC24A, SH3GL2, SLC17A5, SLC17A6, SLC17A7, SLC30A10, SLC32A1, SLC6A17, SNAP91, SNCA, STX1A, SV2A, SV2C, SVOP, SYN1, SYN2, SYN3, SYNGR1, SYNGR3, SYNPR, SYP, SYT1, SYT…
GO:0070382	exocytic vesicle	GO_CellularComponent-EBI-UniProt-GOA_24.08.2018_00h00	1.41526e-19	6.21485e-19	8.06955e-17	1.51304e-16	[4, 5, 6, 7, 8, 9]	Group09	32.3144	74	[ABCC8, APBA1, ATP6V1G2, BRSK1, BRSK2, CRMP1, DBNDD1, DDC, DGKI, DLG4, DOC2A, DOC2B, DRD2, GABRA2, GAD2, GPRIN1, GRIA1, GRIN1, HAP1, KIAA1107, KIF1A, MAL2, NR4A2, PENK, PRKCB, PTPRN, PTPRN2, RAB26, RAB27B, RAB3A, RAB3B, RAB3C, RAB6A, RNF112, RPH3A, SCAMP1, SCAMP5, SEPT5, SEPT6, SEPT8, SH3GL2, SLC17A5, SLC17A6, SLC17A7, SLC32A1, SLC6A17, SNAP25, SNAP91, SNCA, STX1A, STX1B, STXBP5, SUCO, SV2A, SV2C…
GO:0030672	synaptic vesicle membrane	GO_CellularComponent-EBI-UniProt-GOA_24.08.2018_00h00	1.14569e-14	3.04512e-14	8.06955e-17	1.51304e-16	[2, 3, 4, 5, 6, 7, 8, 9, 10, 11, 12]	Group09	36.5854	45	[ABCC8, ATP6V1G2, CRMP1, DBNDD1, DOC2A, DRD2, GABRA2, GAD2, MAL2, PTPRN2, RAB26, RAB27B, RAB3A, RAB3B, RAB3C, RPH3A, SCAMP1, SCAMP5, SH3GL2, SLC17A5, SLC17A6, SLC17A7, SLC32A1, SLC6A17, SNAP91, SNCA, STX1A, SV2A, SV2C, SVOP, SYN1, SYN2, SYN3, SYNGR1, SYNGR3, SYNPR, SYP, SYT1, SYT11, SYT4, SYT5, SYT6, SYT7, TMEM163, ZNRF1]
GO:0098563	intrinsic component of synaptic vesicle membrane	GO_CellularComponent-EBI-UniProt-GOA_24.08.2018_00h00	6.84569e-10	1.01679e-09	8.06955e-17	1.51304e-16	[2, 3, 4, 5, 6, 7, 8, 9, 10, 11, 12, 13]	Group09	43.3962	23	[ATP6V1G2, GABRA2, MAL2, PTPRN2, RAB26, RAB27B, RAB3A, RAB3B, RAB3C, SLC17A7, SLC32A1, SLC6A17, STX1A, SV2A, SV2C, SYN1, SYNGR1, SYNPR, SYP, SYT1, SYT11, SYT4, TMEM163]
GO:0008328	ionotropic glutamate receptor complex	GO_CellularComponent-EBI-UniProt-GOA_24.08.2018_00h00	9.3905e-11	1.63524e-10	5.73386e-14	8.60079e-14	[5, 6, 7, 8, 9]	Group04	43.8596	25	[CACNG4, CACNG8, CNIH2, DLG2, DLG4, GPRIN1, GRIA1, GRIA2, GRIA4, GRID2, GRIK2, GRIN1, GRIN2B, GRIN2D, GRIN3A, GRM2, MPP3, NRN1, OLFM2, OLFM3, PORCN, SHANK2, SHISA7, SHISA9, VWC2]
GO:0005267	potassium channel activity	GO_MolecularFunction-EBI-UniProt-GOA_24.08.2018_00h00	5.81658e-15	1.6785e-14	7.72294e-31	2.8961e-30	[6, 7, 8]	Group14	35	49	[ABCC8, CNGA3, CNGB1, ERG, GRIK1, GRIK2, GRIK3, GRM7, HCN2, HCN3, HCN4, KCNA2, KCNA3, KCNA4, KCNA6, KCNAB1, KCNAB2, KCNB2, KCNC1, KCNC4, KCND2, KCND3, KCNE4, KCNF1, KCNH2, KCNH7, KCNH8, KCNIP1, KCNIP2, KCNIP4, KCNJ11, KCNJ15, KCNJ2, KCNJ3, KCNJ5, KCNJ6, KCNJ9, KCNK3, KCNMA1, KCNMB1, KCNMB2, KCNN3, KCNT1, KCNV1, LRRC55, MTMR6, SNAP25, TMEM175, TMEM38A]
GO:0022843	voltage-gated cation channel activity	GO_MolecularFunction-EBI-UniProt-GOA_24.08.2018_00h00	2.30482e-21	1.22519e-20	7.72294e-31	2.8961e-30	[6, 7, 8]	Group14	40	60	[ABCC8, CACNA1A, CACNA1C, CACNA1D, CACNA1E, CACNA1G, CACNA1I, CACNA2D1, CACNA2D2, CACNB1, CACNB2, CACNB3, CACNB4, CACNG4, CACNG8, CNGA3, CNGB1, ERG, GPRIN1, GRIN1, GRIN2B, GRIN2D, GRIN3A, HCN2, HCN3, HCN4, KCNA2, KCNA3, KCNA4, KCNA6, KCNAB1, KCNAB2, KCNB2, KCNC1, KCNC4, KCND2, KCND3, KCNE4, KCNF1, KCNH2, KCNH7, KCNH8, KCNIP2, KCNJ11, KCNJ15, KCNJ2, KCNJ3, KCNJ5, KCNJ6, KCNJ9, KCNK3, KCNMA1, KCNT1…
GO:0005249	voltage-gated potassium channel activity	GO_MolecularFunction-EBI-UniProt-GOA_24.08.2018_00h00	1.74241e-12	3.91074e-12	7.72294e-31	2.8961e-30	[7, 8, 9]	Group14	37	37	[ABCC8, CNGA3, CNGB1, ERG, HCN2, HCN3, HCN4, KCNA2, KCNA3, KCNA4, KCNA6, KCNAB1, KCNAB2, KCNB2, KCNC1, KCNC4, KCND2, KCND3, KCNE4, KCNF1, KCNH2, KCNH7, KCNH8, KCNIP2, KCNJ11, KCNJ15, KCNJ2, KCNJ3, KCNJ5, KCNJ6, KCNJ9, KCNK3, KCNMA1, KCNT1, KCNV1, LRRC55, SNAP25]
GO:0005230	extracellular ligand-gated ion channel activity	GO_MolecularFunction-EBI-UniProt-GOA_24.08.2018_00h00	8.21981e-10	1.20319e-09	5.73386e-14	8.60079e-14	[6, 8]	Group04	35.2941	30	[CHRNA4, CHRNB2, GABRA2, GABRA3, GABRA4, GABRA5, GABRB1, GABRB2, GABRG2, GABRG3, GABRP, GABRQ, GLRA2, GLRA4, GPRIN1, GRIA1, GRIA2, GRIA4, GRID1, GRID2, GRIK1, GRIK2, GRIK3, GRIN1, GRIN2B, GRIN2D, GRIN3A, GRM2, GRM7, SLC17A7]
GO:0022824	transmitter-gated ion channel activity	GO_MolecularFunction-EBI-UniProt-GOA_24.08.2018_00h00	2.3514e-07	3.16655e-07	5.73386e-14	8.60079e-14	[5, 7, 8, 9]	Group04	35.5932	21	[CHRNA4, CHRNB2, GABRA2, GABRB1, GLRA2, GLRA4, GPRIN1, GRIA1, GRIA2, GRIA4, GRID1, GRID2, GRIK1, GRIK2, GRIK3, GRIN1, GRIN2B, GRIN2D, GRIN3A, GRM2, GRM7]
	D15vsD40 Down regulated genes
GOID	GOTerm	Ontology Source	Term PValue	Term PValue Corrected with Benjamini-Hochberg	Group PValue	Group PValue Corrected with Benjamini-Hochberg	GOLevels	GOGroups	% Associated Genes	Nr. Genes	Associated Genes Found
GO:0006342	chromatin silencing	GO_BiologicalProcess-EBI-UniProt-GOA_24.08.2018_00h00	3.14502e-16	1.40477e-15	1.3334e-55	1.66675e-54	[3, 4, 6, 7, 8, 9, 10, 11, 12]	Group19	38.1295	53	[AKR1A1, ASF1A, ATAD2, BEND3, CDC45, CDKN3, H2AFJ, H2AFV, H2AFX, H2AFY2, H2AFZ, HAT1, HDAC1, HELLS, HIST1H2AB, HIST1H2AC, HIST1H2AD, HIST1H2AE, HIST1H2AG, HIST1H2AH, HIST1H2AI, HIST1H2AJ, HIST1H2AK, HIST1H2AL, HIST1H2AM, HIST1H3A, HIST1H3B, HIST1H3D, HIST1H3E, HIST1H3F, HIST1H3G, HIST1H3H, HIST1H3I, HIST1H3J, HIST1H4A, HIST1H4B, HIST1H4C, HIST1H4D, HIST1H4E, HIST1H4F, HIST1H4H, HIST1H4I, HIST1H4J…
GO:0060968	regulation of gene silencing	GO_BiologicalProcess-EBI-UniProt-GOA_24.08.2018_00h00	1.98332e-09	5.01444e-09	5.71596e-26	4.7633e-25	[3, 4, 5, 6, 7, 8]	Group24	31.4516	39	[AGO1, AJUBA, ASF1A, ATAD2, CDC45, CDK2, CDKN3, HIST1H3A, HIST1H3B, HIST1H3D, HIST1H3E, HIST1H3F, HIST1H3G, HIST1H3H, HIST1H3I, HIST1H3J, HIST1H4A, HIST1H4B, HIST1H4C, HIST1H4D, HIST1H4E, HIST1H4F, HIST1H4H, HIST1H4I, HIST1H4J, HIST1H4L, HIST4H4, HMGA1, LIMD1, LIN28A, MYCN, POLR2D, POLR2G, POLR2H, SIN3A, TP53, TRIM28, TRIM71, UHRF1]
GO:0031047	gene silencing by RNA	GO_BiologicalProcess-EBI-UniProt-GOA_24.08.2018_00h00	9.44222e-07	1.43779e-06	5.71596e-26	4.7633e-25	[3, 6, 7, 8]	Group24	25.1497	42	[AGO1, AJUBA, CHAF1A, CHAF1B, CNOT1, EIF3A, ERI1, HIST1H3A, HIST1H3B, HIST1H3D, HIST1H3E, HIST1H3F, HIST1H3G, HIST1H3H, HIST1H3I, HIST1H3J, HIST1H4A, HIST1H4B, HIST1H4C, HIST1H4D, HIST1H4E, HIST1H4F, HIST1H4H, HIST1H4I, HIST1H4J, HIST1H4L, HIST4H4, HNRNPA2B1, LIMD1, LIN28A, LIN28B, MOV10, MYCN, PABPC1, POLR2D, POLR2G, POLR2H, RAN, RAX, SMAD3, TP53, TRIM71]
GO:0006334	nucleosome assembly	GO_BiologicalProcess-EBI-UniProt-GOA_24.08.2018_00h00	5.99082e-27	6.17515e-26	5.71596e-26	4.7633e-25	[5, 6, 7, 8]	Group24	44.7853	73	[ANP32B, ANP32E, ASF1A, ASF1B, CENPA, CENPH, CENPI, CENPK, CENPL, CENPM, CENPN, CENPO, CENPQ, CENPU, CENPW, CHAF1A, CHAF1B, H1F0, H2AFX, H2AFY2, HAT1, HIST1H1B, HIST1H1C, HIST1H1D, HIST1H1E, HIST1H2BC, HIST1H2BD, HIST1H2BE, HIST1H2BF, HIST1H2BG, HIST1H2BH, HIST1H2BI, HIST1H2BJ, HIST1H2BK, HIST1H2BL, HIST1H2BM, HIST1H2BN, HIST1H2BO, HIST1H3A, HIST1H3B, HIST1H3D, HIST1H3E, HIST1H3F, HIST1H3G, HIST1…
GO:0043486	histone exchange	GO_BiologicalProcess-EBI-UniProt-GOA_24.08.2018_00h00	1.67892e-12	5.23198e-12	5.71596e-26	4.7633e-25	[5, 6, 7, 8]	Group24	45.5882	31	[ANP32B, ANP32E, CENPA, CENPH, CENPI, CENPK, CENPL, CENPM, CENPN, CENPO, CENPQ, CENPU, CENPW, CTDSPL, HIST1H4A, HIST1H4B, HIST1H4C, HIST1H4D, HIST1H4E, HIST1H4F, HIST1H4H, HIST1H4I, HIST1H4J, HIST1H4L, HIST4H4, HJURP, KNL1, MIS18A, MIS18BP1, NASP, NPM1]
GO:0030219	megakaryocyte differentiation	GO_BiologicalProcess-EBI-UniProt-GOA_24.08.2018_00h00	1.99195e-06	2.87012e-06	5.71596e-26	4.7633e-25	[5, 6, 7, 8, 9]	Group24	27.0492	33	[AGO1, AKR1A1, CBFB, EIF3A, HDAC1, HIST1H3A, HIST1H3B, HIST1H3D, HIST1H3E, HIST1H3F, HIST1H3G, HIST1H3H, HIST1H3I, HIST1H3J, HIST1H4A, HIST1H4B, HIST1H4C, HIST1H4D, HIST1H4E, HIST1H4F, HIST1H4H, HIST1H4I, HIST1H4J, HIST1H4L, HIST4H4, HMGB2, MEIS1, MOV10, PRMT6, PTPN6, SIN3A, TESC, WASF2]
GO:0045638	negative regulation of myeloid cell differentiation	GO_BiologicalProcess-EBI-UniProt-GOA_24.08.2018_00h00	6.55726e-05	7.98793e-05	5.71596e-26	4.7633e-25	[4, 5, 6, 7, 8, 9, 10]	Group24	25	28	[CALCA, CDK6, CUL4A, DLL1, FBN1, FSTL1, HIST1H4A, HIST1H4B, HIST1H4C, HIST1H4D, HIST1H4E, HIST1H4F, HIST1H4H, HIST1H4I, HIST1H4J, HIST1H4L, HIST4H4, ITPKB, LYN, MEIS1, MXD3, NCAPG2, PEX2, PVT1, SFRP1, TOB2, ZBTB16, ZFP36L1]
GO:0006335	DNA replication-dependent nucleosome assembly	GO_BiologicalProcess-EBI-UniProt-GOA_24.08.2018_00h00	7.47248e-18	4.17213e-17	5.71596e-26	4.7633e-25	[6, 7, 8, 9]	Group24	74.2857	26	[ASF1A, ASF1B, CHAF1A, CHAF1B, HAT1, HIST1H3A, HIST1H3B, HIST1H3D, HIST1H3E, HIST1H3F, HIST1H3G, HIST1H3H, HIST1H3I, HIST1H3J, HIST1H4A, HIST1H4B, HIST1H4C, HIST1H4D, HIST1H4E, HIST1H4F, HIST1H4H, HIST1H4I, HIST1H4J, HIST1H4L, HIST4H4, NASP]
GO:0006336	DNA replication-independent nucleosome assembly	GO_BiologicalProcess-EBI-UniProt-GOA_24.08.2018_00h00	1.33188e-15	5.57723e-15	5.71596e-26	4.7633e-25	[6, 7, 8, 9]	Group24	54.2373	32	[ASF1A, ASF1B, CENPA, CENPH, CENPI, CENPK, CENPL, CENPM, CENPN, CENPO, CENPQ, CENPU, CENPW, HAT1, HIST1H4A, HIST1H4B, HIST1H4C, HIST1H4D, HIST1H4E, HIST1H4F, HIST1H4H, HIST1H4I, HIST1H4J, HIST1H4L, HIST4H4, HJURP, KNL1, MIS18A, MIS18BP1, NASP, NPM1, RAD54L]
GO:0034080	CENP-A containing nucleosome assembly	GO_BiologicalProcess-EBI-UniProt-GOA_24.08.2018_00h00	7.26979e-15	2.78329e-14	5.71596e-26	4.7633e-25	[5, 6, 7, 8, 9, 10]	Group24	60	27	[CENPA, CENPH, CENPI, CENPK, CENPL, CENPM, CENPN, CENPO, CENPQ, CENPU, CENPW, HIST1H4A, HIST1H4B, HIST1H4C, HIST1H4D, HIST1H4E, HIST1H4F, HIST1H4H, HIST1H4I, HIST1H4J, HIST1H4L, HIST4H4, HJURP, KNL1, MIS18A, MIS18BP1, NPM1]
GO:0045652	regulation of megakaryocyte differentiation	GO_BiologicalProcess-EBI-UniProt-GOA_24.08.2018_00h00	1.27018e-07	2.21045e-07	5.71596e-26	4.7633e-25	[5, 6, 7, 8, 9, 10]	Group24	31.5789	30	[AGO1, AKR1A1, CBFB, EIF3A, HDAC1, HIST1H3A, HIST1H3B, HIST1H3D, HIST1H3E, HIST1H3F, HIST1H3G, HIST1H3H, HIST1H3I, HIST1H3J, HIST1H4A, HIST1H4B, HIST1H4C, HIST1H4D, HIST1H4E, HIST1H4F, HIST1H4H, HIST1H4I, HIST1H4J, HIST1H4L, HIST4H4, HMGB2, MOV10, PRMT6, SIN3A, TESC]
GO:0006342	chromatin silencing	GO_BiologicalProcess-EBI-UniProt-GOA_24.08.2018_00h00	3.14502e-16	1.40477e-15	5.71596e-26	4.7633e-25	[3, 4, 6, 7, 8, 9, 10, 11, 12]	Group24	38.1295	53	[AKR1A1, ASF1A, ATAD2, BEND3, CDC45, CDKN3, H2AFJ, H2AFV, H2AFX, H2AFY2, H2AFZ, HAT1, HDAC1, HELLS, HIST1H2AB, HIST1H2AC, HIST1H2AD, HIST1H2AE, HIST1H2AG, HIST1H2AH, HIST1H2AI, HIST1H2AJ, HIST1H2AK, HIST1H2AL, HIST1H2AM, HIST1H3A, HIST1H3B, HIST1H3D, HIST1H3E, HIST1H3F, HIST1H3G, HIST1H3H, HIST1H3I, HIST1H3J, HIST1H4A, HIST1H4B, HIST1H4C, HIST1H4D, HIST1H4E, HIST1H4F, HIST1H4H, HIST1H4I, HIST1H4J…
GO:0035195	gene silencing by miRNA	GO_BiologicalProcess-EBI-UniProt-GOA_24.08.2018_00h00	5.29311e-09	1.24435e-08	5.71596e-26	4.7633e-25	[5, 8, 9, 10]	Group24	30.0752	40	[AGO1, AJUBA, CHAF1A, CHAF1B, CNOT1, EIF3A, HIST1H3A, HIST1H3B, HIST1H3D, HIST1H3E, HIST1H3F, HIST1H3G, HIST1H3H, HIST1H3I, HIST1H3J, HIST1H4A, HIST1H4B, HIST1H4C, HIST1H4D, HIST1H4E, HIST1H4F, HIST1H4H, HIST1H4I, HIST1H4J, HIST1H4L, HIST4H4, HNRNPA2B1, LIMD1, LIN28A, LIN28B, MOV10, MYCN, POLR2D, POLR2G, POLR2H, RAN, RAX, SMAD3, TP53, TRIM71]
GO:0060964	regulation of gene silencing by miRNA	GO_BiologicalProcess-EBI-UniProt-GOA_24.08.2018_00h00	1.79168e-08	3.69362e-08	5.71596e-26	4.7633e-25	[5, 6, 7, 8, 9, 10, 11]	Group24	34.0909	30	[AGO1, AJUBA, HIST1H3A, HIST1H3B, HIST1H3D, HIST1H3E, HIST1H3F, HIST1H3G, HIST1H3H, HIST1H3I, HIST1H3J, HIST1H4A, HIST1H4B, HIST1H4C, HIST1H4D, HIST1H4E, HIST1H4F, HIST1H4H, HIST1H4I, HIST1H4J, HIST1H4L, HIST4H4, LIMD1, LIN28A, MYCN, POLR2D, POLR2G, POLR2H, TP53, TRIM71]
GO:0000183	chromatin silencing at rDNA	GO_BiologicalProcess-EBI-UniProt-GOA_24.08.2018_00h00	9.35139e-11	2.6106e-10	5.71596e-26	4.7633e-25	[4, 5, 7, 8, 9, 10, 11, 12, 13]	Group24	52.381	22	[BEND3, HIST1H3A, HIST1H3B, HIST1H3D, HIST1H3E, HIST1H3F, HIST1H3G, HIST1H3H, HIST1H3I, HIST1H3J, HIST1H4A, HIST1H4B, HIST1H4C, HIST1H4D, HIST1H4E, HIST1H4F, HIST1H4H, HIST1H4I, HIST1H4J, HIST1H4L, HIST4H4, SUV39H1]
GO:0051054	positive regulation of DNA metabolic process	GO_BiologicalProcess-EBI-UniProt-GOA_24.08.2018_00h00	2.26825e-13	7.59864e-13	1.70679e-25	1.06675e-24	[4, 5, 6, 7, 8]	Group22	26.9896	78	[ABRAXAS1, ANP32B, ANTXR1, ATAD5, AURKB, BABAM2, BAX, BLM, BRCA1, CCT3, CDC7, CDK1, CDK2, CDKN3, CDT1, CHTF18, CHTF8, CST3, DBF4B, DDX11, DDX39B, DEPDC1B, DNA2, DSCC1, E2F7, E2F8, ERCC1, EYA1, EYA2, EYA4, FGF10, FGFR1, FOXM1, GAMT, GLI2, H2AFX, HNRNPA1, HNRNPA2B1, HNRNPD, HSP90AB1, KANK2, MAD2L2, MAPK15, MGMT, MRE11, MSH2, MSH6, NBN, NEK2, NEK7, NME1, NOX4, PARM1, PARP1, PARP4, PCNA, PFN1, PGAP2,…
GO:0044786	cell cycle DNA replication	GO_BiologicalProcess-EBI-UniProt-GOA_24.08.2018_00h00	7.56484e-17	3.8988e-16	1.70679e-25	1.06675e-24	[3, 4, 7, 8, 9]	Group22	49.3671	39	[ATAD5, BCL2L11, BLMH, BRCA2, CDC45, CDC7, CDT1, CHEK2, DBF4B, DNA2, E2F7, E2F8, FANCD2, FGFR1, GINS1, GINS2, GMNN, LIG1, LRIG1, MRE11, PCNA, PGAP2, POLA2, POLD1, POLD2, POLD3, PRIM2, RAD51, RAD54L, RFC1, RFC2, RFC3, RFC5, RPA1, RPA2, RPA3, SMC1A, STAG2, TIPIN]
GO:0006275	regulation of DNA replication	GO_BiologicalProcess-EBI-UniProt-GOA_24.08.2018_00h00	6.1048e-13	1.94772e-12	1.70679e-25	1.06675e-24	[5, 6, 7, 8]	Group22	34.5324	48	[ANTXR1, APEX1, ATAD5, BCL2L11, BLM, BLMH, BRCA2, CDC6, CDC7, CDK1, CDK2, CDT1, CHEK2, CHTF18, CHTF8, CST3, DBF4B, DNA2, DSCC1, E2F7, E2F8, ESCO2, FANCD2, FGF10, FGFR1, GLI2, GMNN, ID3, KANK2, LRIG3, MRE11, NBN, NME1, PCNA, PGAP2, POLD1, RAD54L, RFC2, RFC3, RFC5, SFRP1, SMC1A, STAG2, STOML2, STON1, SYTL2, TICRR, TIPIN]
GO:0006261	DNA-dependent DNA replication	GO_BiologicalProcess-EBI-UniProt-GOA_24.08.2018_00h00	9.2717e-29	1.24241e-27	1.70679e-25	1.06675e-24	[6, 7, 8]	Group22	42.4242	84	[ALYREF, ATAD5, BCL2L11, BLM, BLMH, BRCA2, CCNE1, CDC45, CDC6, CDC7, CDK2, CDK2AP1, CDT1, CHEK2, CHTF18, CHTF8, DBF4B, DDX11, DNA2, DSCC1, E2F7, E2F8, EME1, ETAA1, FANCD2, FANCM, FGFR1, GEN1, GINS1, GINS2, GINS4, GMNN, HELB, HMGA1, LIG1, LRIG1, LRIG3, MCM10, MCM2, MCM3, MCM4, MCM5, MCM6, MCM7, MCM8, MGME1, MMS22L, MRE11, NBN, NME1, NPAS1, ORC1, ORC6, PARP1, PCNA, PGAP2, POLA2, POLD1, POLD2, POLD3…
GO:0006270	DNA replication initiation	GO_BiologicalProcess-EBI-UniProt-GOA_24.08.2018_00h00	1.20122e-10	3.28496e-10	1.70679e-25	1.06675e-24	[5, 6, 7, 8, 9]	Group22	50	23	[CCNE1, CDC45, CDC6, CDC7, CDK2, CDT1, GINS2, GINS4, MCM10, MCM2, MCM3, MCM4, MCM5, MCM6, MCM7, MCM8, NBN, NME1, ORC1, ORC6, POLA2, SLC25A15, TICRR]
GO:0006289	nucleotide-excision repair	GO_BiologicalProcess-EBI-UniProt-GOA_24.08.2018_00h00	6.24044e-05	7.67174e-05	1.70679e-25	1.06675e-24	[6, 7, 8]	Group22	23.5294	32	[BRCA2, BTN2A2, CHD1L, CUL4A, ERCC1, FANCD2, HMGN1, LIG1, LRIG1, LRIG3, NEIL3, PARP1, PCNA, POLD1, POLD2, POLD3, POLE, POLL, POLR2D, POLR2G, POLR2H, RBBP8, RFC1, RFC2, RFC3, RFC5, RPA1, RPA2, RPA3, RPS27A, TP53, UBA52]
GO:0045740	positive regulation of DNA replication	GO_BiologicalProcess-EBI-UniProt-GOA_24.08.2018_00h00	2.74719e-07	4.33087e-07	1.70679e-25	1.06675e-24	[5, 6, 7, 8, 9]	Group22	38.1818	21	[ATAD5, CDC7, CDK1, CDK2, CDT1, CST3, DBF4B, DNA2, E2F7, E2F8, FGF10, FGFR1, GLI2, KANK2, PCNA, PGAP2, POLD1, RAD54L, STOML2, STON1, SYTL2]
GO:0033260	nuclear DNA replication	GO_BiologicalProcess-EBI-UniProt-GOA_24.08.2018_00h00	8.56833e-14	3.02146e-13	1.70679e-25	1.06675e-24	[4, 5, 8, 9, 10]	Group22	48.4848	32	[ATAD5, BRCA2, CDC45, CDC7, CDT1, CHEK2, DBF4B, DNA2, FANCD2, FGFR1, GINS1, GINS2, GMNN, LIG1, LRIG1, PCNA, PGAP2, POLA2, POLD1, POLD2, POLD3, PRIM2, RAD51, RAD54L, RFC1, RFC2, RFC3, RFC5, RPA1, RPA2, RPA3, TIPIN]
GO:0090329	regulation of DNA-dependent DNA replication	GO_BiologicalProcess-EBI-UniProt-GOA_24.08.2018_00h00	2.16293e-13	7.43159e-13	1.70679e-25	1.06675e-24	[6, 7, 8, 9]	Group22	48.4375	31	[BCL2L11, BLM, BLMH, BRCA2, CDC7, CDK2, CDT1, CHEK2, CHTF18, CHTF8, DBF4B, DSCC1, E2F7, E2F8, FANCD2, FGFR1, GMNN, LRIG3, MRE11, NBN, NME1, RAD54L, RFC2, RFC3, RFC5, SMC1A, STAG2, STOML2, SYTL2, TICRR, TIPIN]
GO:0006364	rRNA processing	GO_BiologicalProcess-EBI-UniProt-GOA_24.08.2018_00h00	2.75647e-06	3.84757e-06	8.26628e-22	4.13314e-21	[5, 7, 8, 9]	Group12	22.0339	52	[BYSL, CDK2, CHD7, DIS3L, EIF3A, ERI1, FBL, HEATR1, IGF2BP3, LSM6, MDN1, MRPS9, NOB1, NOP14, NPM3, RPF1, RPL10A, RPL11, RPL12, RPL14, RPL18, RPL26, RPL27, RPL35, RPL35A, RPL5, RPL7, RPL7A, RPS14, RPS15, RPS16, RPS17, RPS19, RPS2, RPS21, RPS24, RPS27, RPS28, RPS4X, RPS6, RPS7, RPS8, RPS9, RPSA, RRS1, SHQ1, SUV39H1, TEX10, TNIP1, TTK, UTP20, WDR12]
GO:0016072	rRNA metabolic process	GO_BiologicalProcess-EBI-UniProt-GOA_24.08.2018_00h00	1.95237e-06	2.84367e-06	8.26628e-22	4.13314e-21	[7, 8]	Group12	21.2014	60	[BYSL, CDK2, CHD7, DDX11, DIS3L, EIF3A, ERI1, FBL, GTF3C6, H2AFY2, HEATR1, IGF2BP3, LSM6, MDN1, MRPS9, NCL, NOB1, NOP14, NOP53, NPM3, PRC1, RPF1, RPL10A, RPL11, RPL12, RPL14, RPL18, RPL26, RPL27, RPL35, RPL35A, RPL5, RPL7, RPL7A, RPS14, RPS15, RPS16, RPS17, RPS19, RPS2, RPS21, RPS24, RPS27, RPS28, RPS4X, RPS6, RPS7, RPS8, RPS9, RPSA, RRS1, SHQ1, SLFN13, SUV39H1, TEX10, TNIP1, TTK, UTP20, WDR12, Z…
GO:0045047	protein targeting to ER	GO_BiologicalProcess-EBI-UniProt-GOA_24.08.2018_00h00	4.06795e-44	1.81702e-42	8.26628e-22	4.13314e-21	[6, 7, 8, 9, 10]	Group12	64.2276	79	[RPL10, RPL10A, RPL11, RPL12, RPL13, RPL13A, RPL14, RPL15, RPL17, RPL18, RPL18A, RPL19, RPL21, RPL22, RPL23, RPL23A, RPL24, RPL26, RPL27, RPL27A, RPL28, RPL29, RPL3, RPL30, RPL31, RPL32, RPL34, RPL35, RPL35A, RPL36, RPL36A, RPL37, RPL37A, RPL38, RPL39, RPL4, RPL41, RPL5, RPL6, RPL7, RPL7A, RPL8, RPL9, RPLP0, RPLP1, RPLP2, RPS10, RPS11, RPS12, RPS13, RPS14, RPS15, RPS15A, RPS16, RPS17, RPS18, RPS1…
GO:0006613	cotranslational protein targeting to membrane	GO_BiologicalProcess-EBI-UniProt-GOA_24.08.2018_00h00	9.68154e-46	6.48663e-44	8.26628e-22	4.13314e-21	[6, 7, 8, 9, 10, 11]	Group12	66.3866	79	[RPL10, RPL10A, RPL11, RPL12, RPL13, RPL13A, RPL14, RPL15, RPL17, RPL18, RPL18A, RPL19, RPL21, RPL22, RPL23, RPL23A, RPL24, RPL26, RPL27, RPL27A, RPL28, RPL29, RPL3, RPL30, RPL31, RPL32, RPL34, RPL35, RPL35A, RPL36, RPL36A, RPL37, RPL37A, RPL38, RPL39, RPL4, RPL41, RPL5, RPL6, RPL7, RPL7A, RPL8, RPL9, RPLP0, RPLP1, RPLP2, RPS10, RPS11, RPS12, RPS13, RPS14, RPS15, RPS15A, RPS16, RPS17, RPS18, RPS1…
GO:0000726	non-recombinational repair	GO_BiologicalProcess-EBI-UniProt-GOA_24.08.2018_00h00	5.29226e-09	1.26636e-08	1.41682e-18	5.9034e-18	[6, 7, 8]	Group07	33.0097	34	[ABRAXAS1, BABAM2, BARD1, BRCA1, C7orf49, DCLRE1A, DEK, DEPDC1B, ERCC1, FBXL7, H2AFX, HIST1H4A, HIST1H4B, HIST1H4C, HIST1H4D, HIST1H4E, HIST1H4F, HIST1H4H, HIST1H4I, HIST1H4J, HIST1H4L, HIST4H4, HMGA2, MAD2L2, MDC1, MRE11, NBN, NME1, POLL, POLQ, PRKDC, RBBP8, USP51, XRCC6]
GO:0006302	double-strand break repair	GO_BiologicalProcess-EBI-UniProt-GOA_24.08.2018_00h00	1.41682e-18	8.6297e-18	1.41682e-18	5.9034e-18	[6, 7, 8]	Group07	31.3433	84	[ABRAXAS1, APOBEC3C, BABAM2, BARD1, BLM, BRCA1, BRCA2, BRIP1, C14orf39, C7orf49, CDC45, CDC7, CDCA5, CHEK1, CHEK2, DCLRE1A, DDX11, DEK, DEPDC1B, DMC1, DNA2, EME1, ERCC1, ESCO2, EYA1, FANCD2, FBXL7, FIGN, FIGNL2, FOXM1, GEN1, GINS2, GINS4, H2AFX, HELB, HIST1H4A, HIST1H4B, HIST1H4C, HIST1H4D, HIST1H4E, HIST1H4F, HIST1H4H, HIST1H4I, HIST1H4J, HIST1H4L, HIST4H4, HMGA2, LRIG3, MAD2L2, MCM8, MDC1, MGMT…
GO:0000724	double-strand break repair via homologous recombination	GO_BiologicalProcess-EBI-UniProt-GOA_24.08.2018_00h00	4.1199e-10	1.10413e-09	1.41682e-18	5.9034e-18	[7, 8, 9]	Group07	30.7692	44	[BLM, BRCA1, BRCA2, CDC45, CDC7, CHEK1, DMC1, FANCD2, FIGN, FIGNL2, GEN1, GINS2, GINS4, H2AFX, HELB, LRIG3, MAD2L2, MCM8, MMS22L, MRE11, NBN, NME1, NPAS1, PARP1, PARPBP, POLL, POLQ, RAD51, RAD51AP1, RAD51B, RAD54B, RAD54L, RBBP8, RFWD3, RPA1, RPA2, RPA3, SFR1, TEX15, TONSL, USP51, XRCC2, XRCC3, YY1]
GO:0000077	DNA damage checkpoint	GO_BiologicalProcess-EBI-UniProt-GOA_24.08.2018_00h00	6.01173e-11	1.75124e-10	3.43643e-18	1.2273e-17	[4, 5, 6, 7, 8]	Group20	28.0193	58	[ABRAXAS1, ANTXR1, AURKA, BABAM2, BAX, BLM, BRCA1, BRIP1, CCNB1, CCND1, CDC14B, CDC25C, CDK1, CDK2, CHAF1A, CHAF1B, CHEK1, CHEK2, CLSPN, CNOT1, CUL4A, DDX39B, DEPDC1B, DTL, E2F1, E2F7, E2F8, EME1, ETAA1, FANCI, GTSE1, H2AFX, HMGA2, HNRNPK, JAG1, MAP3K20, MDC1, MRE11, MSH2, NBN, NME1, NOP53, PAMR1, PCNA, PLK1, POLD1, PRKDC, RFWD3, RPA2, RPL26, RPS27L, SFRP1, TFDP2, TIPIN, TP53, USP28, WDR76, ZNF36…
GO:0044774	mitotic DNA integrity checkpoint	GO_BiologicalProcess-EBI-UniProt-GOA_24.08.2018_00h00	1.06997e-06	1.61097e-06	3.43643e-18	1.2273e-17	[4, 5, 6, 7, 8]	Group20	26.2069	38	[AURKA, BAX, BLM, CCNB1, CCND1, CDC25C, CDK1, CDK2, CHAF1A, CHAF1B, CHEK2, CLSPN, CNOT1, E2F1, E2F7, E2F8, EME1, FANCI, GTSE1, HMGA2, MDC1, MRE11, MSH2, NBN, NME1, NOP53, PCNA, POLD1, PRKDC, RFWD3, RPA2, RPL26, RPS27L, TFDP2, TICRR, TIPIN, TOP2A, TP53]
GO:1901991	negative regulation of mitotic cell cycle phase transition	GO_BiologicalProcess-EBI-UniProt-GOA_24.08.2018_00h00	2.28256e-12	6.95143e-12	3.43643e-18	1.2273e-17	[5, 6, 7, 8]	Group20	27.6423	68	[AURKA, AURKB, BAX, BLM, BRCA1, BRD7, BUB1, BUB1B, BUB3, CCNB1, CCND1, CDC20, CDC25C, CDK1, CDK2, CDT1, CENPF, CHAF1A, CHAF1B, CHEK2, CLSPN, CNOT1, CTDSP1, CTDSP2, CTDSPL, E2F1, E2F7, E2F8, EZH2, FAM107A, FANCI, FBXL7, FBXO5, GEN1, GTSE1, HMGA2, JADE1, KANK2, MAD2L1, MAD2L2, MRE11, NACC2, NBN, NDC80, NME1, NOP53, PCNA, PLK1, POLD1, PRKD2, PRKDC, RFWD3, RPA2, RPL26, RPS27, RPS27L, TEP1, TFDP2, TIC…
GO:0031572	G2 DNA damage checkpoint	GO_BiologicalProcess-EBI-UniProt-GOA_24.08.2018_00h00	2.15193e-07	3.51656e-07	3.43643e-18	1.2273e-17	[5, 6, 7, 8, 9]	Group20	40	20	[ABRAXAS1, BABAM2, BLM, BRCA1, CDC14B, CDK1, CHEK1, CLSPN, DEPDC1B, DTL, FANCI, HMGA2, MRE11, NBN, NME1, NOP53, PAMR1, PLK1, POLD1, ZNF367]
GO:0044773	mitotic DNA damage checkpoint	GO_BiologicalProcess-EBI-UniProt-GOA_24.08.2018_00h00	2.36817e-06	3.34037e-06	3.43643e-18	1.2273e-17	[5, 6, 7, 8, 9]	Group20	26.087	36	[AURKA, BAX, BLM, CCNB1, CCND1, CDC25C, CDK1, CDK2, CHAF1A, CHAF1B, CHEK2, CLSPN, CNOT1, E2F1, E2F7, E2F8, EME1, FANCI, GTSE1, HMGA2, MDC1, MRE11, MSH2, NBN, NME1, NOP53, PCNA, POLD1, PRKDC, RFWD3, RPA2, RPL26, RPS27L, TFDP2, TIPIN, TP53]
GO:0072422	signal transduction involved in DNA damage checkpoint	GO_BiologicalProcess-EBI-UniProt-GOA_24.08.2018_00h00	8.95445e-07	1.37919e-06	3.43643e-18	1.2273e-17	[5, 6, 7, 8, 9]	Group20	29.1262	30	[ABRAXAS1, AURKA, BABAM2, BAX, BRCA1, CCNB1, CDC14B, CDC25C, CDK1, CDK2, CHAF1A, CHAF1B, CHEK1, CHEK2, CNOT1, DEPDC1B, DTL, E2F1, E2F7, E2F8, GTSE1, PAMR1, PCNA, PLK1, POLD1, PRKDC, RPL26, TFDP2, TP53, ZNF367]
GO:2000045	regulation of G1/S transition of mitotic cell cycle	GO_BiologicalProcess-EBI-UniProt-GOA_24.08.2018_00h00	4.03348e-08	7.72123e-08	3.43643e-18	1.2273e-17	[6, 7, 8]	Group20	25.2475	51	[ADAMTS1, ANXA1, APEX1, AURKA, BAX, BRD7, CCNB1, CCND1, CCND2, CDC25C, CDC45, CDC6, CDK1, CDK2, CDK4, CDK6, CDKN2C, CHAF1A, CHAF1B, CHEK2, CNOT1, CTDSP1, CTDSP2, CTDSPL, CUL4A, E2F1, E2F7, E2F8, EZH2, FAM107A, FGF10, GTSE1, JADE1, KANK2, KIF14, MTBP, NACC2, PCNA, POLD1, PRKD2, PRKDC, PTPN6, RFWD3, RPA2, RPL26, RPS27L, TEP1, TFDP2, TP53, UBE2L6, WEE1]
GO:2000134	negative regulation of G1/S transition of mitotic cell cycle	GO_BiologicalProcess-EBI-UniProt-GOA_24.08.2018_00h00	2.36817e-06	3.34037e-06	3.43643e-18	1.2273e-17	[6, 7, 8, 9]	Group20	26.087	36	[AURKA, BAX, BRD7, CCNB1, CCND1, CDC25C, CDK1, CDK2, CHAF1A, CHAF1B, CHEK2, CNOT1, CTDSP1, CTDSP2, CTDSPL, E2F1, E2F7, E2F8, EZH2, FAM107A, GTSE1, JADE1, KANK2, NACC2, PCNA, POLD1, PRKD2, PRKDC, RFWD3, RPA2, RPL26, RPS27L, TEP1, TFDP2, TP53, WEE1]
GO:2000816	negative regulation of mitotic sister chromatid separation	GO_BiologicalProcess-EBI-UniProt-GOA_24.08.2018_00h00	4.5845e-07	7.14329e-07	3.43643e-18	1.2273e-17	[5, 6, 7, 8, 9, 10]	Group20	38.4615	20	[BUB1, BUB1B, BUB3, CCNB1, CDC20, CDT1, CENPF, FBXO5, GEN1, MAD2L1, MAD2L2, NDC80, PLK1, PTTG1, RPS27, TPR, TRIP13, TTK, USP44, XRCC3]
GO:0051054	positive regulation of DNA metabolic process	GO_BiologicalProcess-EBI-UniProt-GOA_24.08.2018_00h00	2.26825e-13	7.59864e-13	7.81156e-15	2.16988e-14	[4, 5, 6, 7, 8]	Group14	26.9896	78	[ABRAXAS1, ANP32B, ANTXR1, ATAD5, AURKB, BABAM2, BAX, BLM, BRCA1, CCT3, CDC7, CDK1, CDK2, CDKN3, CDT1, CHTF18, CHTF8, CST3, DBF4B, DDX11, DDX39B, DEPDC1B, DNA2, DSCC1, E2F7, E2F8, ERCC1, EYA1, EYA2, EYA4, FGF10, FGFR1, FOXM1, GAMT, GLI2, H2AFX, HNRNPA1, HNRNPA2B1, HNRNPD, HSP90AB1, KANK2, MAD2L2, MAPK15, MGMT, MRE11, MSH2, MSH6, NBN, NEK2, NEK7, NME1, NOX4, PARM1, PARP1, PARP4, PCNA, PFN1, PGAP2,…
GO:0006275	regulation of DNA replication	GO_BiologicalProcess-EBI-UniProt-GOA_24.08.2018_00h00	6.1048e-13	1.94772e-12	7.81156e-15	2.16988e-14	[5, 6, 7, 8]	Group14	34.5324	48	[ANTXR1, APEX1, ATAD5, BCL2L11, BLM, BLMH, BRCA2, CDC6, CDC7, CDK1, CDK2, CDT1, CHEK2, CHTF18, CHTF8, CST3, DBF4B, DNA2, DSCC1, E2F7, E2F8, ESCO2, FANCD2, FGF10, FGFR1, GLI2, GMNN, ID3, KANK2, LRIG3, MRE11, NBN, NME1, PCNA, PGAP2, POLD1, RAD54L, RFC2, RFC3, RFC5, SFRP1, SMC1A, STAG2, STOML2, STON1, SYTL2, TICRR, TIPIN]
GO:0045740	positive regulation of DNA replication	GO_BiologicalProcess-EBI-UniProt-GOA_24.08.2018_00h00	2.74719e-07	4.33087e-07	7.81156e-15	2.16988e-14	[5, 6, 7, 8, 9]	Group14	38.1818	21	[ATAD5, CDC7, CDK1, CDK2, CDT1, CST3, DBF4B, DNA2, E2F7, E2F8, FGF10, FGFR1, GLI2, KANK2, PCNA, PGAP2, POLD1, RAD54L, STOML2, STON1, SYTL2]
GO:2000573	positive regulation of DNA biosynthetic process	GO_BiologicalProcess-EBI-UniProt-GOA_24.08.2018_00h00	2.542e-05	3.30707e-05	7.81156e-15	2.16988e-14	[5, 6, 7, 8, 9]	Group14	27.3684	26	[ANTXR1, AURKB, CCT3, CHTF18, CHTF8, DDX39B, DSCC1, GAMT, HNRNPA1, HNRNPA2B1, HNRNPD, HSP90AB1, MAPK15, NEK2, NEK7, NOX4, PARM1, PARP4, PRKD2, PVT1, RFC2, RFC3, RFC5, SFRP1, TNIP1, TPP1]
GO:0033046	negative regulation of sister chromatid segregation	GO_BiologicalProcess-EBI-UniProt-GOA_24.08.2018_00h00	2.73137e-07	4.35718e-07	1.20659e-14	3.01647e-14	[4, 5, 6, 7, 8]	Group18	35.9375	23	[BUB1, BUB1B, BUB3, CCNB1, CDC20, CDT1, CENPF, ESPL1, FBXO5, GEN1, MAD2L1, MAD2L2, NDC80, PARP4, PLK1, PTTG1, RAD54L, RPS27, TPR, TRIP13, TTK, USP44, XRCC3]
GO:0044784	metaphase/anaphase transition of cell cycle	GO_BiologicalProcess-EBI-UniProt-GOA_24.08.2018_00h00	4.32735e-09	1.0543e-08	1.20659e-14	3.01647e-14	[4, 5, 6, 7, 8]	Group18	38.5714	27	[BUB1, BUB1B, BUB3, CCNB1, CDC20, CDC6, CDT1, CENPE, CENPF, DLGAP5, ESPL1, FBXO5, GEN1, MAD2L1, MAD2L2, MAPK15, NDC80, NEK6, PLK1, RPS27, TACC3, TPR, TRIP13, TTK, UBE2C, USP44, XRCC3]
GO:0045839	negative regulation of mitotic nuclear division	GO_BiologicalProcess-EBI-UniProt-GOA_24.08.2018_00h00	2.10248e-08	4.26868e-08	1.20659e-14	3.01647e-14	[4, 5, 6, 7, 8]	Group18	37.1429	26	[BMP7, BUB1, BUB1B, BUB3, CCNB1, CDC20, CDT1, CENPF, CHEK1, FBXO5, GEN1, MAD2L1, MAD2L2, MTBP, NDC80, PARP4, PLK1, PTTG1, RAD54L, RPS27, TOM1L1, TPR, TRIP13, TTK, USP44, XRCC3]
GO:0033047	regulation of mitotic sister chromatid segregation	GO_BiologicalProcess-EBI-UniProt-GOA_24.08.2018_00h00	5.43403e-08	1.02558e-07	1.20659e-14	3.01647e-14	[5, 6, 7, 8]	Group18	33.3333	29	[BUB1, BUB1B, BUB3, CCNB1, CDC20, CDC6, CDT1, CENPE, CENPF, DLGAP5, ESPL1, FBXO5, GEN1, MAD2L1, MAD2L2, NDC80, NEK6, PARP4, PLK1, PTTG1, RAD54L, RPS27, TACC3, TPR, TRIP13, TTK, UBE2C, USP44, XRCC3]
GO:1901991	negative regulation of mitotic cell cycle phase transition	GO_BiologicalProcess-EBI-UniProt-GOA_24.08.2018_00h00	2.28256e-12	6.95143e-12	1.20659e-14	3.01647e-14	[5, 6, 7, 8]	Group18	27.6423	68	[AURKA, AURKB, BAX, BLM, BRCA1, BRD7, BUB1, BUB1B, BUB3, CCNB1, CCND1, CDC20, CDC25C, CDK1, CDK2, CDT1, CENPF, CHAF1A, CHAF1B, CHEK2, CLSPN, CNOT1, CTDSP1, CTDSP2, CTDSPL, E2F1, E2F7, E2F8, EZH2, FAM107A, FANCI, FBXL7, FBXO5, GEN1, GTSE1, HMGA2, JADE1, KANK2, MAD2L1, MAD2L2, MRE11, NACC2, NBN, NDC80, NME1, NOP53, PCNA, PLK1, POLD1, PRKD2, PRKDC, RFWD3, RPA2, RPL26, RPS27, RPS27L, TEP1, TFDP2, TIC…
GO:0010965	regulation of mitotic sister chromatid separation	GO_BiologicalProcess-EBI-UniProt-GOA_24.08.2018_00h00	1.25587e-08	2.71429e-08	1.20659e-14	3.01647e-14	[5, 6, 7, 8, 9]	Group18	36.9863	27	[BUB1, BUB1B, BUB3, CCNB1, CDC20, CDC6, CDT1, CENPE, CENPF, DLGAP5, ESPL1, FBXO5, GEN1, MAD2L1, MAD2L2, NDC80, NEK6, PLK1, PTTG1, RPS27, TACC3, TPR, TRIP13, TTK, UBE2C, USP44, XRCC3]
GO:2000816	negative regulation of mitotic sister chromatid separation	GO_BiologicalProcess-EBI-UniProt-GOA_24.08.2018_00h00	4.5845e-07	7.14329e-07	1.20659e-14	3.01647e-14	[5, 6, 7, 8, 9, 10]	Group18	38.4615	20	[BUB1, BUB1B, BUB3, CCNB1, CDC20, CDT1, CENPF, FBXO5, GEN1, MAD2L1, MAD2L2, NDC80, PLK1, PTTG1, RPS27, TPR, TRIP13, TTK, USP44, XRCC3]
GO:0030111	regulation of Wnt signaling pathway	GO_BiologicalProcess-EBI-UniProt-GOA_24.08.2018_00h00	4.16317e-10	1.09385e-09	2.13685e-12	4.85648e-12	[4, 5, 6, 7, 8]	Group16	22.8883	84	[APOE, ASPM, BMP2, CBFB, CDH2, CSNK2A2, CTNNB1, CTNNBIP1, DEPDC1B, DRAXIN, DVL1, EGF, EGR1, FGF10, FGFR2, FRZB, FSTL1, FZD1, FZD3, FZD6, FZD7, G3BP1, GAMT, GLI3, GPC3, GPRC5B, HDAC1, HNRNPK, IGFBP2, JADE1, KANK1, LEF1, LGR4, LGR5, LIMD1, LRP4, MAD2L2, MDFI, MDFIC, MED12, MTTP, NFATC4, NOG, NOTCH1, NRARP, NXN, PARP4, PFDN5, PLPP3, PMAIP1, PPP1CA, PTK7, RACK1, ROR2, RSPO1, SALL1, SEMA5A, SFRP1, SFR…
GO:0030178	negative regulation of Wnt signaling pathway	GO_BiologicalProcess-EBI-UniProt-GOA_24.08.2018_00h00	6.43383e-08	1.19741e-07	2.13685e-12	4.85648e-12	[4, 5, 6, 7, 8, 9]	Group16	25.5208	49	[APOE, BMP2, CDH2, CTNNBIP1, DRAXIN, DVL1, EGR1, FRZB, FSTL1, FZD1, FZD6, G3BP1, GAMT, GLI3, GPC3, HDAC1, HNRNPK, IGFBP2, JADE1, LIMD1, LRP4, MAD2L2, MDFI, MED12, NFATC4, NOG, NOTCH1, NXN, PFDN5, PMAIP1, RACK1, ROR2, SFRP1, SFRP2, SHISA2, SIX3, SLC9A3R1, SOSTDC1, SOX2, SOX9, STK24, TCF7L2, TLE1, TMEM88, TSKU, WDR1, WNT5A, WNT5B, ZNRF3]
GO:0060070	canonical Wnt signaling pathway	GO_BiologicalProcess-EBI-UniProt-GOA_24.08.2018_00h00	6.50523e-11	1.85468e-10	2.13685e-12	4.85648e-12	[5, 6, 7, 8]	Group16	24.375	78	[APOE, ASPM, BCL9, BMP2, CDH2, CTNNB1, DRAXIN, DVL1, EGF, EGR1, FGF10, FGF8, FGFR2, FRZB, FSTL1, FZD1, FZD2, FZD3, FZD4, FZD5, FZD6, FZD7, FZD8, G3BP1, GAMT, GLI3, GPC3, GPRC5B, HDAC1, HMBS, HNRNPK, IGFBP2, JADE1, KANK1, LEF1, LGR4, LGR5, LIMD1, LRP4, LRP5, MAD2L2, MED12, NOG, NOTCH1, NRARP, PARP4, PFDN5, PLPP3, PPP1CA, PTK7, ROR2, RSPO1, RYK, SDC1, SEMA5A, SFRP1, SFRP2, SLC43A3, SLC9A3R1, SMAD3,…
GO:0060828	regulation of canonical Wnt signaling pathway	GO_BiologicalProcess-EBI-UniProt-GOA_24.08.2018_00h00	1.73532e-07	2.90666e-07	2.13685e-12	4.85648e-12	[5, 6, 7, 8, 9]	Group16	22.6415	60	[APOE, ASPM, BMP2, CDH2, CTNNB1, DRAXIN, DVL1, EGF, EGR1, FGF10, FGFR2, FRZB, FSTL1, FZD1, FZD3, FZD6, FZD7, G3BP1, GAMT, GLI3, GPC3, GPRC5B, HDAC1, HNRNPK, IGFBP2, JADE1, KANK1, LGR4, LGR5, LIMD1, LRP4, MAD2L2, NOG, NOTCH1, NRARP, PARP4, PFDN5, PPP1CA, PTK7, ROR2, RSPO1, SEMA5A, SFRP1, SFRP2, SLC43A3, SLC9A3R1, SMAD3, SOSTDC1, SOX2, SOX9, STK24, TBL1X, TCF7L2, TMEM88, TRPM4, WDR1, WNT5A, WNT5B, …
GO:0090090	negative regulation of canonical Wnt signaling pathway	GO_BiologicalProcess-EBI-UniProt-GOA_24.08.2018_00h00	5.73203e-06	7.75851e-06	2.13685e-12	4.85648e-12	[5, 6, 7, 8, 9, 10]	Group16	24.359	38	[APOE, BMP2, CDH2, DRAXIN, DVL1, EGR1, FRZB, FSTL1, FZD1, FZD6, G3BP1, GAMT, GLI3, GPC3, HDAC1, HNRNPK, IGFBP2, JADE1, LIMD1, LRP4, MAD2L2, NOG, NOTCH1, PFDN5, ROR2, SFRP1, SFRP2, SLC9A3R1, SOSTDC1, SOX2, SOX9, STK24, TCF7L2, TMEM88, WDR1, WNT5A, WNT5B, ZNRF3]
GO:0006402	mRNA catabolic process	GO_BiologicalProcess-EBI-UniProt-GOA_24.08.2018_00h00	1.79436e-23	1.41437e-22	2.39572e-11	4.99108e-11	[5, 6, 7, 8]	Group23	29.9233	117	[AGO1, ANP32A, ANP32B, APEX1, CHAF1A, CHAF1B, CNOT1, CPAMD8, DCP2, DCPS, E2F1, EIF3E, ENPP2, HELLS, HNRNPD, HNRNPK, HSPB1, IGF2BP1, IGF2BP3, LSM2, LSM4, LSM5, LSM6, NOS2, NPM1, PABPC1, PNRC1, POLR2D, POLR2G, PRR5L, QKI, RPL10, RPL10A, RPL11, RPL12, RPL13, RPL13A, RPL14, RPL15, RPL17, RPL18, RPL18A, RPL19, RPL21, RPL22, RPL23, RPL23A, RPL24, RPL26, RPL27, RPL27A, RPL28, RPL29, RPL3, RPL30, RPL31, …
GO:0006605	protein targeting	GO_BiologicalProcess-EBI-UniProt-GOA_24.08.2018_00h00	2.10149e-16	1.00571e-15	2.39572e-11	4.99108e-11	[5, 6, 7, 8, 9]	Group23	24.6407	120	[ACOX2, AP3B1, BAG3, CLU, CROT, CSNK2A2, CTDSP2, ECI2, EPHX2, ERBB2, FUT10, FZD5, GSTK1, HOMER3, HSPD1, ICMT, LEPR, LEPROT, LMAN1, MAP3K8, MIPEP, MYO1E, NDUFA13, NOS2, NUDT7, PEX2, PHYH, PLAG1, PROS1, PSAT1, RHOU, RNF31, RPL10, RPL10A, RPL11, RPL12, RPL13, RPL13A, RPL14, RPL15, RPL17, RPL18, RPL18A, RPL19, RPL21, RPL22, RPL23, RPL23A, RPL24, RPL26, RPL27, RPL27A, RPL28, RPL29, RPL3, RPL30, RPL31,…
GO:0006364	rRNA processing	GO_BiologicalProcess-EBI-UniProt-GOA_24.08.2018_00h00	2.75647e-06	3.84757e-06	2.39572e-11	4.99108e-11	[5, 7, 8, 9]	Group23	22.0339	52	[BYSL, CDK2, CHD7, DIS3L, EIF3A, ERI1, FBL, HEATR1, IGF2BP3, LSM6, MDN1, MRPS9, NOB1, NOP14, NPM3, RPF1, RPL10A, RPL11, RPL12, RPL14, RPL18, RPL26, RPL27, RPL35, RPL35A, RPL5, RPL7, RPL7A, RPS14, RPS15, RPS16, RPS17, RPS19, RPS2, RPS21, RPS24, RPS27, RPS28, RPS4X, RPS6, RPS7, RPS8, RPS9, RPSA, RRS1, SHQ1, SUV39H1, TEX10, TNIP1, TTK, UTP20, WDR12]
GO:0000956	nuclear-transcribed mRNA catabolic process	GO_BiologicalProcess-EBI-UniProt-GOA_24.08.2018_00h00	1.01738e-27	1.13607e-26	2.39572e-11	4.99108e-11	[6, 7, 8, 9]	Group23	37.3077	97	[AGO1, CHAF1A, CHAF1B, CNOT1, DCP2, DCPS, EIF3E, ENPP2, LSM2, LSM4, LSM5, LSM6, NOS2, PABPC1, PNRC1, POLR2D, POLR2G, RPL10, RPL10A, RPL11, RPL12, RPL13, RPL13A, RPL14, RPL15, RPL17, RPL18, RPL18A, RPL19, RPL21, RPL22, RPL23, RPL23A, RPL24, RPL26, RPL27, RPL27A, RPL28, RPL29, RPL3, RPL30, RPL31, RPL32, RPL34, RPL35, RPL35A, RPL36, RPL36A, RPL37, RPL37A, RPL38, RPL39, RPL4, RPL41, RPL5, RPL6, RPL7,…
GO:0006612	protein targeting to membrane	GO_BiologicalProcess-EBI-UniProt-GOA_24.08.2018_00h00	1.90826e-25	1.59816e-24	2.39572e-11	4.99108e-11	[5, 6, 7, 8, 9, 10]	Group23	38.7097	84	[ERBB2, ICMT, MYO1E, RPL10, RPL10A, RPL11, RPL12, RPL13, RPL13A, RPL14, RPL15, RPL17, RPL18, RPL18A, RPL19, RPL21, RPL22, RPL23, RPL23A, RPL24, RPL26, RPL27, RPL27A, RPL28, RPL29, RPL3, RPL30, RPL31, RPL32, RPL34, RPL35, RPL35A, RPL36, RPL36A, RPL37, RPL37A, RPL38, RPL39, RPL4, RPL41, RPL5, RPL6, RPL7, RPL7A, RPL8, RPL9, RPLP0, RPLP1, RPLP2, RPS10, RPS11, RPS12, RPS13, RPS14, RPS15, RPS15A, RPS16…
GO:0045047	protein targeting to ER	GO_BiologicalProcess-EBI-UniProt-GOA_24.08.2018_00h00	4.06795e-44	1.81702e-42	2.39572e-11	4.99108e-11	[6, 7, 8, 9, 10]	Group23	64.2276	79	[RPL10, RPL10A, RPL11, RPL12, RPL13, RPL13A, RPL14, RPL15, RPL17, RPL18, RPL18A, RPL19, RPL21, RPL22, RPL23, RPL23A, RPL24, RPL26, RPL27, RPL27A, RPL28, RPL29, RPL3, RPL30, RPL31, RPL32, RPL34, RPL35, RPL35A, RPL36, RPL36A, RPL37, RPL37A, RPL38, RPL39, RPL4, RPL41, RPL5, RPL6, RPL7, RPL7A, RPL8, RPL9, RPLP0, RPLP1, RPLP2, RPS10, RPS11, RPS12, RPS13, RPS14, RPS15, RPS15A, RPS16, RPS17, RPS18, RPS1…
GO:0000184	nuclear-transcribed mRNA catabolic process, nonsense-mediated decay	GO_BiologicalProcess-EBI-UniProt-GOA_24.08.2018_00h00	9.92443e-39	2.65975e-37	2.39572e-11	4.99108e-11	[7, 8, 9, 10]	Group23	54.1936	84	[DCP2, EIF3E, ENPP2, PABPC1, PNRC1, RPL10, RPL10A, RPL11, RPL12, RPL13, RPL13A, RPL14, RPL15, RPL17, RPL18, RPL18A, RPL19, RPL21, RPL22, RPL23, RPL23A, RPL24, RPL26, RPL27, RPL27A, RPL28, RPL29, RPL3, RPL30, RPL31, RPL32, RPL34, RPL35, RPL35A, RPL36, RPL36A, RPL37, RPL37A, RPL38, RPL39, RPL4, RPL41, RPL5, RPL6, RPL7, RPL7A, RPL8, RPL9, RPLP0, RPLP1, RPLP2, RPS10, RPS11, RPS12, RPS13, RPS14, RPS15…
GO:0006613	cotranslational protein targeting to membrane	GO_BiologicalProcess-EBI-UniProt-GOA_24.08.2018_00h00	9.68154e-46	6.48663e-44	2.39572e-11	4.99108e-11	[6, 7, 8, 9, 10, 11]	Group23	66.3866	79	[RPL10, RPL10A, RPL11, RPL12, RPL13, RPL13A, RPL14, RPL15, RPL17, RPL18, RPL18A, RPL19, RPL21, RPL22, RPL23, RPL23A, RPL24, RPL26, RPL27, RPL27A, RPL28, RPL29, RPL3, RPL30, RPL31, RPL32, RPL34, RPL35, RPL35A, RPL36, RPL36A, RPL37, RPL37A, RPL38, RPL39, RPL4, RPL41, RPL5, RPL6, RPL7, RPL7A, RPL8, RPL9, RPLP0, RPLP1, RPLP2, RPS10, RPS11, RPS12, RPS13, RPS14, RPS15, RPS15A, RPS16, RPS17, RPS18, RPS1…
GO:0000731	DNA synthesis involved in DNA repair	GO_BiologicalProcess-EBI-UniProt-GOA_24.08.2018_00h00	8.32324e-08	1.52783e-07	1.09857e-10	2.11263e-10	[6, 7, 8]	Group15	36.9231	24	[BLM, CTDSP1, DTL, ISG15, MAD2L2, PAMR1, PCLAF, PCNA, POLD1, POLD2, POLD3, POLE, POLE2, RFC1, RFC2, RFC3, RFC5, RPA1, RPA2, RPA3, RPL5, RPS27A, UBA52, UBE2L6]
GO:0006289	nucleotide-excision repair	GO_BiologicalProcess-EBI-UniProt-GOA_24.08.2018_00h00	6.24044e-05	7.67174e-05	1.09857e-10	2.11263e-10	[6, 7, 8]	Group15	23.5294	32	[BRCA2, BTN2A2, CHD1L, CUL4A, ERCC1, FANCD2, HMGN1, LIG1, LRIG1, LRIG3, NEIL3, PARP1, PCNA, POLD1, POLD2, POLD3, POLE, POLL, POLR2D, POLR2G, POLR2H, RBBP8, RFC1, RFC2, RFC3, RFC5, RPA1, RPA2, RPA3, RPS27A, TP53, UBA52]
GO:0006301	postreplication repair	GO_BiologicalProcess-EBI-UniProt-GOA_24.08.2018_00h00	1.62132e-07	2.75009e-07	1.09857e-10	2.11263e-10	[6, 7, 8]	Group15	35.8209	24	[BRCA1, DTL, ISG15, MAD2L2, MSH2, PAMR1, PCLAF, PCNA, POLD1, POLD2, POLD3, POLE2, RAD18, RFC1, RFC2, RFC3, RFC5, RPA1, RPA2, RPA3, RPL5, RPS27A, UBA52, UBE2L6]
GO:0033260	nuclear DNA replication	GO_BiologicalProcess-EBI-UniProt-GOA_24.08.2018_00h00	8.56833e-14	3.02146e-13	1.09857e-10	2.11263e-10	[4, 5, 8, 9, 10]	Group15	48.4848	32	[ATAD5, BRCA2, CDC45, CDC7, CDT1, CHEK2, DBF4B, DNA2, FANCD2, FGFR1, GINS1, GINS2, GMNN, LIG1, LRIG1, PCNA, PGAP2, POLA2, POLD1, POLD2, POLD3, PRIM2, RAD51, RAD54L, RFC1, RFC2, RFC3, RFC5, RPA1, RPA2, RPA3, TIPIN]
GO:0019985	translesion synthesis	GO_BiologicalProcess-EBI-UniProt-GOA_24.08.2018_00h00	1.90288e-07	3.14797e-07	1.09857e-10	2.11263e-10	[7, 8, 9]	Group15	38.8889	21	[DTL, ISG15, MAD2L2, PAMR1, PCLAF, PCNA, POLD1, POLD2, POLD3, POLE2, RFC1, RFC2, RFC3, RFC5, RPA1, RPA2, RPA3, RPL5, RPS27A, UBA52, UBE2L6]
GO:0072006	nephron development	GO_BiologicalProcess-EBI-UniProt-GOA_24.08.2018_00h00	1.56715e-06	2.30767e-06	2.92396e-10	5.22137e-10	[3, 5, 6, 7, 8]	Group17	24.4186	42	[BMP2, BMP7, CTNNB1, CTNNBIP1, DLL1, EGR1, EYA1, FGF8, GAMT, GLI3, GPC3, GREB1L, HES1, HES5, IRX2, JAG1, LAMA5, LAMB2, LAMC1, LGR4, LMNB2, MYO1E, NID1, NOG, NOTCH1, NOTCH3, PAX8, PRKD2, PROM1, PTCH1, PVT1, SALL1, SIX4, SMO, SOAT1, SOX8, SOX9, SULF1, TEK, WDR1, WNT7B, YAP1]
GO:0001823	mesonephros development	GO_BiologicalProcess-EBI-UniProt-GOA_24.08.2018_00h00	2.33732e-06	3.33193e-06	2.92396e-10	5.22137e-10	[5, 6, 7, 8]	Group17	26.3566	34	[BMP2, BMP7, CTNNBIP1, EYA1, FGF10, FGF8, FGFR1, FGFR2, FSTL1, GAMT, GDF11, GLI3, GPC3, GREB1L, HES1, LAMA5, LGR4, NOG, PAX8, PRKD2, PTCH1, PVT1, SALL1, SDC1, SDC4, SFRP1, SIX4, SMAD3, SMAD6, SMO, SOX8, SOX9, SPRY1, ZBTB16]
GO:0061333	renal tubule morphogenesis	GO_BiologicalProcess-EBI-UniProt-GOA_24.08.2018_00h00	4.43292e-05	5.65725e-05	2.92396e-10	5.22137e-10	[5, 6, 7, 8]	Group17	26.8817	25	[BMP2, COL4A1, CTNNBIP1, EYA1, FGF8, GAMT, GLI3, GPC3, GREB1L, HES1, HES5, IRX2, LAMA5, LGR4, LGR5, NOG, PAX8, PRKD2, PTCH1, PVT1, SALL1, SIX4, SMO, SOX8, SOX9]
GO:0072073	kidney epithelium development	GO_BiologicalProcess-EBI-UniProt-GOA_24.08.2018_00h00	8.27941e-09	1.84907e-08	2.92396e-10	5.22137e-10	[5, 6, 7, 8]	Group17	26.8817	50	[BMP2, BMP7, CTNNB1, CTNNBIP1, DLL1, EPHA4, EPHA7, EYA1, FGF8, FGFR1, FGFR2, FSTL1, GAMT, GDF11, GLI3, GPC3, GREB1L, HES1, HES5, IRX2, JAG1, KANK2, LAMA5, LAMB2, LAMC1, LGR4, LMNB2, MYO1E, NOG, NOTCH1, PAX8, PRKD2, PROM1, PTCH1, PVT1, SALL1, SDC1, SDC4, SFRP1, SIX4, SMAD3, SMAD6, SMO, SOAT1, SOX8, SOX9, SPRY1, WDR1, WNT7B, YAP1]
GO:0072009	nephron epithelium development	GO_BiologicalProcess-EBI-UniProt-GOA_24.08.2018_00h00	2.82246e-06	3.89907e-06	2.92396e-10	5.22137e-10	[4, 6, 7, 8, 9]	Group17	25.7143	36	[BMP2, CTNNB1, CTNNBIP1, DLL1, EYA1, FGF8, GAMT, GLI3, GPC3, GREB1L, HES1, HES5, IRX2, JAG1, LAMA5, LAMB2, LAMC1, LGR4, LMNB2, MYO1E, NOG, NOTCH1, PAX8, PRKD2, PROM1, PTCH1, PVT1, SALL1, SIX4, SMO, SOAT1, SOX8, SOX9, WDR1, WNT7B, YAP1]
GO:0072080	nephron tubule development	GO_BiologicalProcess-EBI-UniProt-GOA_24.08.2018_00h00	3.46706e-06	4.74067e-06	2.92396e-10	5.22137e-10	[5, 6, 7, 8, 9, 10]	Group17	27.4336	31	[BMP2, CTNNB1, CTNNBIP1, DLL1, EYA1, FGF8, GAMT, GLI3, GPC3, GREB1L, HES1, HES5, IRX2, JAG1, LAMA5, LGR4, NOG, NOTCH1, PAX8, PRKD2, PROM1, PTCH1, PVT1, SALL1, SIX4, SMO, SOAT1, SOX8, SOX9, WNT7B, YAP1]
GO:0001657	ureteric bud development	GO_BiologicalProcess-EBI-UniProt-GOA_24.08.2018_00h00	6.10744e-06	8.18397e-06	2.92396e-10	5.22137e-10	[5, 6, 8, 9, 10, 11]	Group17	26.0163	32	[BMP2, BMP7, CTNNBIP1, EYA1, FGF8, FGFR1, FGFR2, FSTL1, GAMT, GDF11, GLI3, GPC3, GREB1L, HES1, LAMA5, LGR4, NOG, PAX8, PRKD2, PTCH1, PVT1, SALL1, SDC1, SDC4, SFRP1, SIX4, SMAD3, SMAD6, SMO, SOX8, SOX9, SPRY1]
GO:0060041	retina development in camera-type eye	GO_BiologicalProcess-EBI-UniProt-GOA_24.08.2018_00h00	3.72742e-05	4.80263e-05	1.1758e-09	1.95967e-09	[3, 7, 8, 9]	Group11	22.043	41	[BAX, BMPR1B, CHD7, CLIC4, COL4A1, DIO3, DLL1, EGF, ELP4, FZD4, LAMB2, LAMC1, LHX2, LMNB2, LRP5, MAN2A1, MDM1, MED12, MERTK, NAP1L1, NECTIN3, NEUROD1, NEUROD4, NR2E1, PDE6B, PFDN5, POLR2D, PROM1, PTCH1, PTN, RPL24, RRM1, SDK2, SERPINF1, SIX3, SOX8, SOX9, TGIF2, TSPAN12, TST, TULP1]
GO:0043010	camera-type eye development	GO_BiologicalProcess-EBI-UniProt-GOA_24.08.2018_00h00	1.1758e-09	3.02995e-09	1.1758e-09	1.95967e-09	[6, 7, 8]	Group11	22.4	84	[BAX, BCAR3, BMP7, BMPR1B, CDK4, CHD7, CLIC4, COL4A1, CRYAB, DIO3, DLL1, EFEMP1, EGF, ELP4, EPHA2, FAT1, FBN1, FBN2, FGF10, FRZB, FZD4, FZD5, GDF11, GJA1, GLI3, GPD2, HDAC1, HES5, HMGN1, JAG1, KDM2B, LAMB2, LAMC1, LHX2, LMNB2, LRP5, MAF, MAN2A1, MDM1, MED12, MEIS1, MERTK, MIPEP, NAP1L1, NECTIN3, NES, NEUROD1, NEUROD4, NR2E1, PDE6B, PFDN5, POLR2D, PROM1, PTCH1, PTN, PTX3, RAX, RCN1, RPL24, RRM1, R…
GO:0048593	camera-type eye morphogenesis	GO_BiologicalProcess-EBI-UniProt-GOA_24.08.2018_00h00	4.72292e-05	5.97049e-05	1.1758e-09	1.95967e-09	[6, 7, 8, 9]	Group11	24.0602	32	[BAX, BCAR3, BMP7, DIO3, DLL1, EGF, ELP4, EPHA2, FAT1, FZD5, GDF11, GLI3, HMGN1, JAG1, KDM2B, LRP5, MAN2A1, MEIS1, NECTIN3, POLR2D, PROM1, PTN, PTX3, SDK2, SIX3, SOX1, SOX8, SOX9, TSKU, TSPAN12, WNT5A, YY1]
GO:0048839	inner ear development	GO_BiologicalProcess-EBI-UniProt-GOA_24.08.2018_00h00	6.84369e-09	1.55433e-08	1.98447e-09	3.10073e-09	[3, 6, 7, 8]	Group10	24.5902	60	[ANP32B, ASPM, ATP6V1B1, BMP2, CCNA2, CECR2, CELSR1, CHD7, COL2A1, DLL1, DVL1, EYA1, EYA4, FGF10, FGF8, FGFR1, FGFR2, FREM2, FRZB, FSTL1, FZD2, FZD3, FZD6, GLI2, GLI3, HES1, HES5, HESX1, HPN, JAG1, LGR5, LIG1, LRIG1, LRIG3, LRP4, MAF, MCM2, MCM7, MED12, MYCL, MYCN, MYO3B, NEUROD1, NEUROG1, NOTCH1, OTX1, PAX8, PTK7, ROR1, ROR2, SDC4, SFRP1, SIX4, SLC9A3R1, SOX2, SOX9, SPRY2, STOX1, TRIOBP, WNT5A]
GO:0042471	ear morphogenesis	GO_BiologicalProcess-EBI-UniProt-GOA_24.08.2018_00h00	3.2804e-08	6.46432e-08	1.98447e-09	3.10073e-09	[5, 6, 7, 8]	Group10	28.3688	40	[ATP6V1B1, CELSR1, CHD7, COL2A1, DVL1, EYA1, FGF10, FGF8, FGFR1, FGFR2, FRZB, FSTL1, FZD2, FZD3, FZD6, GLI2, HESX1, HPN, LIG1, LRIG1, LRIG3, MYO3B, NEUROG1, NOG, OTX1, PAX8, PTK7, RAX, ROR2, RPL38, SALL1, SFRP1, SIX4, SLC9A3R1, SOX9, SPRY2, STOX1, THNSL1, TRIOBP, WNT5A]
GO:0042472	inner ear morphogenesis	GO_BiologicalProcess-EBI-UniProt-GOA_24.08.2018_00h00	8.71889e-08	1.57883e-07	1.98447e-09	3.10073e-09	[4, 5, 6, 7, 8, 9]	Group10	29.4118	35	[ATP6V1B1, CELSR1, CHD7, COL2A1, DVL1, EYA1, FGF10, FGF8, FGFR1, FGFR2, FRZB, FSTL1, FZD2, FZD3, FZD6, GLI2, HESX1, HPN, LIG1, LRIG1, LRIG3, MYO3B, NEUROG1, OTX1, PAX8, PTK7, ROR2, SFRP1, SIX4, SLC9A3R1, SOX9, SPRY2, STOX1, TRIOBP, WNT5A]
GO:0001838	embryonic epithelial tube formation	GO_BiologicalProcess-EBI-UniProt-GOA_24.08.2018_00h00	1.68783e-08	3.5339e-08	1.68783e-08	2.48211e-08	[5, 6, 7, 8]	Group06	27.8481	44	[ADM, ALX1, BMP7, CECR2, CELSR1, DLEC1, DVL1, FSTL1, FZD1, FZD2, FZD3, FZD6, GAMT, HES5, IRX2, KDM2B, KIF20B, LHX2, LRP2, MED12, MTTP, NOG, PAX8, PFN1, PMEL, PTCH1, PTK7, RGMA, SALL4, SDC4, SFRP1, SFRP2, SHROOM3, SIX4, SOX8, SOX9, STIL, STK24, TEAD2, TESC, TRIM71, VASP, WNT5A, ZEB2]
GO:0001841	neural tube formation	GO_BiologicalProcess-EBI-UniProt-GOA_24.08.2018_00h00	2.7225e-07	4.39536e-07	1.68783e-08	2.48211e-08	[5, 6, 7, 8, 9]	Group06	27.8195	37	[ADM, ALX1, BMP7, CECR2, CELSR1, DLEC1, DVL1, FSTL1, FZD1, FZD2, FZD3, FZD6, KDM2B, KIF20B, LHX2, LRP2, MED12, MTTP, NOG, PFN1, PMEL, PTCH1, PTK7, RGMA, SALL4, SDC4, SFRP1, SFRP2, SHROOM3, STIL, STK24, TEAD2, TESC, TRIM71, VASP, WNT5A, ZEB2]
GO:0045005	DNA-dependent DNA replication maintenance of fidelity	GO_BiologicalProcess-EBI-UniProt-GOA_24.08.2018_00h00	3.88234e-08	7.53962e-08	3.88234e-08	5.39214e-08	[5, 6, 7, 8, 9]	Group02	42	21	[ALYREF, BLM, BRCA2, DDX11, EME1, ETAA1, FANCD2, FANCM, GEN1, MMS22L, MRE11, NPAS1, PCNA, POLD1, POLE, PTN, RAD51, RAD54L, RFWD3, TIPIN, TONSL]
GO:0035567	non-canonical Wnt signaling pathway	GO_BiologicalProcess-EBI-UniProt-GOA_24.08.2018_00h00	1.28916e-07	2.21472e-07	6.2174e-08	8.18079e-08	[5, 6, 7, 8]	Group05	28.5714	36	[AGO1, AP2S1, ARHGEF19, CELSR1, CTNNB1, DVL1, FRZB, FSTL1, FZD1, FZD2, FZD3, FZD4, FZD5, FZD6, FZD7, FZD8, GPC3, GPC4, GPC6, LEF1, MED12, MOV10, MTTP, PFN1, PTK7, RHOA, ROR1, ROR2, RYK, SFRP1, SFRP2, TCF7L2, TIAM1, WDR1, WNT5A, ZNRF3]
GO:0090175	regulation of establishment of planar polarity	GO_BiologicalProcess-EBI-UniProt-GOA_24.08.2018_00h00	2.67211e-09	6.63078e-09	6.2174e-08	8.18079e-08	[5, 6, 7, 8]	Group05	36.5854	30	[AP2S1, ARHGEF19, CELSR1, DVL1, FSTL1, FZD1, FZD2, FZD3, FZD4, FZD5, FZD6, FZD7, GPC3, GPC4, GPC6, MED12, MTTP, PFN1, PTK7, RHOA, ROR1, ROR2, RYK, SAPCD2, SFRP1, SFRP2, TIAM1, WDR1, WNT5A, ZNRF3]
GO:0001837	epithelial to mesenchymal transition	GO_BiologicalProcess-EBI-UniProt-GOA_24.08.2018_00h00	9.81992e-08	1.73141e-07	9.81992e-08	1.22749e-07	[5, 6, 7, 8]	Group08	26.506	44	[ACVR1, ALX1, BMP2, BMP7, CD74, CDKN3, CRB2, CTNNB1, DAG1, EZH2, FAM83D, FGF8, FGFR2, FSTL1, GAMT, GCNT2, GLIPR2, HAS2, HMGA2, HPN, JAG1, LEF1, MAD2L2, NOG, NOTCH1, PDPN, PHLDB2, SDCBP, SFRP1, SFRP2, SMAD3, SMAD6, SOX9, SPRY1, TAF8, TCF7L2, TCN2, TEP1, TGFBR1, TGFBR3, TIAM1, TRIM28, WDR1, WNT5A]
GO:0010717	regulation of epithelial to mesenchymal transition	GO_BiologicalProcess-EBI-UniProt-GOA_24.08.2018_00h00	9.4484e-08	1.68811e-07	9.81992e-08	1.22749e-07	[4, 5, 6, 7, 8, 9]	Group08	30.2752	33	[ACVR1, ALX1, BMP2, BMP7, CD74, CRB2, CTNNB1, DAG1, EZH2, FSTL1, GAMT, GCNT2, GLIPR2, HPN, JAG1, LEF1, MAD2L2, NOG, NOTCH1, PDPN, PHLDB2, SDCBP, SFRP1, SFRP2, SMAD3, SMAD6, TAF8, TCF7L2, TCN2, TEP1, TGFBR1, TIAM1, WDR1]
GO:0010718	positive regulation of epithelial to mesenchymal transition	GO_BiologicalProcess-EBI-UniProt-GOA_24.08.2018_00h00	2.74719e-07	4.33087e-07	9.81992e-08	1.22749e-07	[3, 4, 5, 6, 7, 8, 9, 10]	Group08	38.1818	21	[ACVR1, ALX1, BMP2, BMP7, CD74, CRB2, CTNNB1, EZH2, GCNT2, GLIPR2, JAG1, LEF1, NOTCH1, PDPN, SDCBP, SMAD3, TAF8, TCF7L2, TCN2, TGFBR1, TIAM1]
GO:0006282	regulation of DNA repair	GO_BiologicalProcess-EBI-UniProt-GOA_24.08.2018_00h00	1.28916e-07	2.21472e-07	1.28916e-07	1.53472e-07	[5, 6, 7, 8]	Group04	28.5714	36	[ABRAXAS1, BABAM2, BRCA1, C7orf49, CDKN3, CHEK1, CUL4A, DDX11, DEK, DEPDC1B, EYA1, EYA2, EYA4, FGF10, FIGN, FIGNL2, FOXM1, H2AFX, HELB, HMGA2, MAD2L2, MGMT, PARP1, PARPBP, PCNA, POLQ, RAD51, RAD51AP1, RPA2, RPS3, TEX15, TIMELESS, TMEM161A, TRIM28, USP1, USP51]
GO:0045739	positive regulation of DNA repair	GO_BiologicalProcess-EBI-UniProt-GOA_24.08.2018_00h00	6.15161e-05	7.63255e-05	1.28916e-07	1.53472e-07	[4, 5, 6, 7, 8, 9]	Group04	28.9855	20	[ABRAXAS1, BABAM2, BRCA1, CDKN3, DDX11, DEPDC1B, EYA1, EYA2, EYA4, FGF10, FOXM1, H2AFX, MAD2L2, MGMT, PARP1, PCNA, RPS3, TIMELESS, TMEM161A, TRIM28]
GO:1903707	negative regulation of hemopoiesis	GO_BiologicalProcess-EBI-UniProt-GOA_24.08.2018_00h00	2.53994e-05	3.33678e-05	1.71993e-07	1.95446e-07	[3, 4, 5, 6, 7, 8, 9]	Group13	22.4719	40	[ANXA1, CALCA, CBFB, CD74, CDK2, CDK6, CUL4A, DLL1, ERBB2, FBN1, FSTL1, GLI3, HES1, HES5, HIST1H4A, HIST1H4B, HIST1H4C, HIST1H4D, HIST1H4E, HIST1H4F, HIST1H4H, HIST1H4I, HIST1H4J, HIST1H4L, HIST4H4, ITPKB, LYN, MEIS1, MXD3, NCAPG2, NOTCH1, NRARP, PEX2, PVT1, SFRP1, SMAD6, TOB2, ZBTB16, ZBTB7B, ZFP36L1]
GO:0045638	negative regulation of myeloid cell differentiation	GO_BiologicalProcess-EBI-UniProt-GOA_24.08.2018_00h00	6.55726e-05	7.98793e-05	1.71993e-07	1.95446e-07	[4, 5, 6, 7, 8, 9, 10]	Group13	25	28	[CALCA, CDK6, CUL4A, DLL1, FBN1, FSTL1, HIST1H4A, HIST1H4B, HIST1H4C, HIST1H4D, HIST1H4E, HIST1H4F, HIST1H4H, HIST1H4I, HIST1H4J, HIST1H4L, HIST4H4, ITPKB, LYN, MEIS1, MXD3, NCAPG2, PEX2, PVT1, SFRP1, TOB2, ZBTB16, ZFP36L1]
GO:0000183	chromatin silencing at rDNA	GO_BiologicalProcess-EBI-UniProt-GOA_24.08.2018_00h00	9.35139e-11	2.6106e-10	1.71993e-07	1.95446e-07	[4, 5, 7, 8, 9, 10, 11, 12, 13]	Group13	52.381	22	[BEND3, HIST1H3A, HIST1H3B, HIST1H3D, HIST1H3E, HIST1H3F, HIST1H3G, HIST1H3H, HIST1H3I, HIST1H3J, HIST1H4A, HIST1H4B, HIST1H4C, HIST1H4D, HIST1H4E, HIST1H4F, HIST1H4H, HIST1H4I, HIST1H4J, HIST1H4L, HIST4H4, SUV39H1]
GO:0010001	glial cell differentiation	GO_BiologicalProcess-EBI-UniProt-GOA_24.08.2018_00h00	1.19635e-06	1.78123e-06	1.19635e-06	1.30038e-06	[4, 6, 7, 8]	Group01	22.1344	56	[ASPM, BMP2, CD9, CDH2, CDK1, CDK6, CDKN2C, CLU, DAG1, DLL1, DNAAF3, DUSP15, ELP4, EPHA4, ERBB2, FGF10, GLI3, GSN, GSTP1, HDAC1, HES1, HES5, LAMB2, LAMC1, LEF1, LLGL2, LMNB2, LYN, MED12, METRN, MPP5, MTTP, MYCN, NAB1, NEUROD4, NOG, NOTCH1, NR2E1, PHGDH, PLP1, PMAIP1, POLD1, POU3F1, PTPRZ1, RHOA, ROR1, ROR2, SLC45A3, SMO, SOX2, SOX8, SOX9, SRSF1, TEP1, VIM, WDR1]
GO:0003279	cardiac septum development	GO_BiologicalProcess-EBI-UniProt-GOA_24.08.2018_00h00	8.89324e-06	1.1799e-05	8.89324e-06	9.26379e-06	[3, 4, 6, 7, 8]	Group00	25	34	[ACVR1, ADAMTS6, BMP7, BMPR1A, CCNA2, CHD7, FGF8, FGFR2, FZD1, FZD2, HEG1, HES1, JAG1, LRP2, LTBP1, NAP1L1, NELL2, NOG, NOTCH1, NOTCH2, PARVA, PAX8, PLXND1, PRDM1, PTK7, SALL1, SALL4, SMAD6, SMO, SP1, TGFBR1, TGFBR3, TPP1, WNT5A]
GO:0044427	chromosomal part	GO_CellularComponent-EBI-UniProt-GOA_24.08.2018_00h00	2.5646e-57	3.43657e-55	2.39739e-57	5.99348e-56	[3, 4, 5, 6, 7, 8]	Group21	28.2918	318	[ACKR3, ALYREF, ANAPC16, ANP32E, ANTXR1, APEX1, APOBEC3C, APOBEC3F, ASF1A, ASF1B, ATAD5, AURKA, AURKB, BCL2L11, BEND3, BIRC5, BLM, BLMH, BRCA1, BRCA2, BUB1, BUB1B, BUB3, C14orf39, CAD, CAPG, CAPN2, CBX2, CBX5, CCNB1, CCNB1IP1, CCND2, CDC45, CDCA5, CDCA8, CDK1, CDK2, CDK4, CDKN3, CDT1, CECR2, CENPA, CENPE, CENPF, CENPH, CENPI, CENPK, CENPL, CENPM, CENPN, CENPO, CENPQ, CENPU, CENPV, CENPW, CHAF1A, …
GO:0000793	condensed chromosome	GO_CellularComponent-EBI-UniProt-GOA_24.08.2018_00h00	9.05838e-21	5.78011e-20	2.39739e-57	5.99348e-56	[5, 6, 7, 8]	Group21	32.7138	88	[ADD3, ANAPC16, AURKA, AURKB, BCL2L11, BIRC5, BLM, BLMH, BRCA1, BRCA2, BUB1, BUB1B, BUB3, C14orf39, CAPG, CCNB1, CCNB1IP1, CDCA5, CDK2, CDT1, CENPA, CENPE, CENPF, CENPH, CENPK, CENPM, CENPN, CENPO, CENPU, CENPV, CENPW, CHEK1, CTDSP1, CTDSP2, CTDSPL, DDX11, DMC1, DSN1, FANCD2, H2AFX, HJURP, HMGB2, INCENP, KIF2C, KNL1, KNSTRN, KNTC1, MAD2L1, MIS18BP1, MKI67, MSH5, NCAPD2, NCAPG, NCAPG2, NCAPH, NDC8…
GO:0098687	chromosomal region	GO_CellularComponent-EBI-UniProt-GOA_24.08.2018_00h00	1.14722e-33	1.9216e-32	2.39739e-57	5.99348e-56	[4, 5, 6, 7, 8, 9]	Group21	32.8054	145	[ALYREF, ANAPC16, ANTXR1, APEX1, AURKA, AURKB, BCL2L11, BIRC5, BLM, BLMH, BRCA2, BUB1, BUB1B, BUB3, CAPG, CBX5, CCNB1, CDCA5, CDCA8, CDK1, CDK2, CDT1, CENPA, CENPE, CENPF, CENPH, CENPI, CENPK, CENPL, CENPM, CENPN, CENPO, CENPQ, CENPU, CENPV, CENPW, CHEK1, CHEK2, CTDSP1, CTDSPL, DCLRE1A, DLEC1, DMC1, DNA2, DSCC1, DSN1, ERCC1, ESCO2, FANCD2, H2AFX, H2AFY2, HAT1, HELLS, HIST1H4A, HIST1H4B, HIST1H4C,…
GO:0000776	kinetochore	GO_CellularComponent-EBI-UniProt-GOA_24.08.2018_00h00	7.86714e-17	3.90443e-16	2.39739e-57	5.99348e-56	[2, 4, 5, 6, 7, 8, 9, 10, 11]	Group21	35.6725	61	[ANAPC16, AURKB, BIRC5, BUB1, BUB1B, BUB3, CBX5, CCNB1, CDT1, CENPA, CENPE, CENPF, CENPH, CENPI, CENPK, CENPM, CENPN, CENPO, CENPU, CENPV, CENPW, DLEC1, DSN1, HJURP, INCENP, KIF18A, KIF22, KIF2C, KNL1, KNSTRN, KNTC1, MAD2L1, MIS18BP1, MTBP, NDC80, NDE1, NEK2, NUF2, NUP107, NUP37, NUP43, NUP85, PHF6, PLK1, PMF1, PPP1CC, RPS27, SEPT2, SGO1, SGO2, SIN3A, SKA1, SKA3, SMC1A, SPAG5, SPC24, SPC25, SPDL1…
GO:0000775	chromosome, centromeric region	GO_CellularComponent-EBI-UniProt-GOA_24.08.2018_00h00	1.23828e-21	8.7331e-21	2.39739e-57	5.99348e-56	[5, 6, 7, 8, 9, 10]	Group21	34.5679	84	[ANAPC16, AURKA, AURKB, BCL2L11, BIRC5, BLMH, BUB1, BUB1B, BUB3, CAPG, CBX5, CCNB1, CDCA5, CDCA8, CDT1, CENPA, CENPE, CENPF, CENPH, CENPI, CENPK, CENPL, CENPM, CENPN, CENPO, CENPQ, CENPU, CENPV, CENPW, CTDSP1, CTDSPL, DLEC1, DSCC1, DSN1, ESCO2, HELLS, HJURP, IKZF1, INCENP, KIF18A, KIF22, KIF2C, KNL1, KNSTRN, KNTC1, MAD2L1, MIS18A, MIS18BP1, MTBP, NCAPD2, NCAPG, NDC80, NDE1, NEK2, NUF2, NUP107, NU…
GO:0000781	chromosome, telomeric region	GO_CellularComponent-EBI-UniProt-GOA_24.08.2018_00h00	4.64345e-14	1.68168e-13	2.39739e-57	5.99348e-56	[5, 6, 7, 8, 9, 10]	Group21	30.7692	64	[ALYREF, ANTXR1, APEX1, BLM, BRCA2, CBX5, CDK1, CDK2, CHEK1, CHEK2, DCLRE1A, DMC1, DNA2, ERCC1, FANCD2, H2AFX, H2AFY2, HAT1, HIST1H4A, HIST1H4B, HIST1H4C, HIST1H4D, HIST1H4E, HIST1H4F, HIST1H4H, HIST1H4I, HIST1H4J, HIST1H4L, HIST4H4, HNRNPA2B1, MCM2, MCM3, MCM4, MCM5, MCM6, MCM7, MRE11, MSH2, NBN, NME1, NSMCE4A, ORC1, PARP1, PARP4, PCNA, PIF1, POLD1, PPP1CA, PPP1CC, PRKDC, RAD51, RAD54L, RPA1, RP…
GO:0000777	condensed chromosome kinetochore	GO_CellularComponent-EBI-UniProt-GOA_24.08.2018_00h00	4.315e-17	2.31284e-16	2.39739e-57	5.99348e-56	[3, 5, 6, 7, 8, 9, 10, 11, 12]	Group21	41.3223	50	[ANAPC16, BIRC5, BUB1, BUB1B, BUB3, CCNB1, CDT1, CENPA, CENPE, CENPF, CENPH, CENPK, CENPM, CENPN, CENPO, CENPU, CENPV, CENPW, DSN1, HJURP, INCENP, KIF2C, KNL1, KNSTRN, KNTC1, MAD2L1, MIS18BP1, NDC80, NDE1, NEK2, NUF2, NUP107, NUP37, NUP43, NUP85, PHF6, PLK1, PMF1, PPP1CC, SEPT2, SGO1, SGO2, SKA1, SKA3, SMC1A, SPAG5, SPC24, SPC25, SPDL1, ZWINT]
GO:0000794	condensed nuclear chromosome	GO_CellularComponent-EBI-UniProt-GOA_24.08.2018_00h00	9.32622e-09	2.04871e-08	2.39739e-57	5.99348e-56	[5, 6, 7, 8, 9, 10, 11]	Group21	30.8333	37	[ADD3, AURKA, AURKB, BCL2L11, BLM, BLMH, BRCA1, BRCA2, BUB1, BUB1B, C14orf39, CCNB1, CCNB1IP1, CENPA, CHEK1, CTDSP1, CTDSP2, CTDSPL, DMC1, DSN1, FANCD2, H2AFX, INCENP, MIS18BP1, MSH5, NCAPD2, NCAPH, NDC80, NEK2, PLK1, PMF1, RAD51, RAD54L, RCC1, RRS1, SMC1A, SUV39H1]
GO:0000779	condensed chromosome, centromeric region	GO_CellularComponent-EBI-UniProt-GOA_24.08.2018_00h00	5.079e-18	2.95907e-17	2.39739e-57	5.99348e-56	[6, 7, 8, 9, 10, 11]	Group21	39.7163	56	[ANAPC16, AURKA, AURKB, BIRC5, BUB1, BUB1B, BUB3, CAPG, CCNB1, CDT1, CENPA, CENPE, CENPF, CENPH, CENPK, CENPM, CENPN, CENPO, CENPU, CENPV, CENPW, DSN1, HJURP, INCENP, KIF2C, KNL1, KNSTRN, KNTC1, MAD2L1, MIS18BP1, NCAPD2, NCAPG, NDC80, NDE1, NEK2, NUF2, NUP107, NUP37, NUP43, NUP85, PHF6, PLK1, PMF1, PPP1CC, RAD54L, SEPT2, SGO1, SGO2, SKA1, SKA3, SMC1A, SPAG5, SPC24, SPC25, SPDL1, ZWINT]
GO:0000784	nuclear chromosome, telomeric region	GO_CellularComponent-EBI-UniProt-GOA_24.08.2018_00h00	4.76432e-13	1.55712e-12	2.39739e-57	5.99348e-56	[5, 6, 7, 8, 9, 10, 11, 12]	Group21	32.3353	54	[ALYREF, ANTXR1, APEX1, BRCA2, CBX5, CDK1, DCLRE1A, DNA2, ERCC1, FANCD2, H2AFY2, HAT1, HIST1H4A, HIST1H4B, HIST1H4C, HIST1H4D, HIST1H4E, HIST1H4F, HIST1H4H, HIST1H4I, HIST1H4J, HIST1H4L, HIST4H4, MCM2, MCM3, MCM4, MCM5, MCM6, MCM7, MRE11, MSH2, NBN, NME1, ORC1, PARP1, PARP4, PCNA, PIF1, POLD1, PPP1CA, PPP1CC, PRKDC, RAD51, RAD54L, RPA1, RPA2, SFRP1, SLC25A15, STON1, THOC6, THOC7, TPP1, XRCC3, XRC…
GO:0044427	chromosomal part	GO_CellularComponent-EBI-UniProt-GOA_24.08.2018_00h00	2.5646e-57	3.43657e-55	1.3334e-55	1.66675e-54	[3, 4, 5, 6, 7, 8]	Group19	28.2918	318	[ACKR3, ALYREF, ANAPC16, ANP32E, ANTXR1, APEX1, APOBEC3C, APOBEC3F, ASF1A, ASF1B, ATAD5, AURKA, AURKB, BCL2L11, BEND3, BIRC5, BLM, BLMH, BRCA1, BRCA2, BUB1, BUB1B, BUB3, C14orf39, CAD, CAPG, CAPN2, CBX2, CBX5, CCNB1, CCNB1IP1, CCND2, CDC45, CDCA5, CDCA8, CDK1, CDK2, CDK4, CDKN3, CDT1, CECR2, CENPA, CENPE, CENPF, CENPH, CENPI, CENPK, CENPL, CENPM, CENPN, CENPO, CENPQ, CENPU, CENPV, CENPW, CHAF1A, …
GO:0000785	chromatin	GO_CellularComponent-EBI-UniProt-GOA_24.08.2018_00h00	1.37262e-25	1.22621e-24	1.3334e-55	1.66675e-54	[4, 5, 6, 7, 8, 9]	Group19	25.9939	170	[ACKR3, ANP32E, APOBEC3C, APOBEC3F, ASF1A, ASF1B, BCL2L11, BEND3, BLMH, BRCA1, CAD, CAPN2, CBX2, CBX5, CCND2, CDCA5, CDK2, CDK4, CDKN3, CECR2, CENPA, CENPF, CHAF1A, CHAF1B, CHEK1, CHRAC1, CSNK2A2, CTNNB1, DDX11, DFFA, DSCC1, E2F1, EIF3E, ELP4, EME1, ESCO2, EZH2, FAM111A, FANK1, GATAD2A, GLI3, GRHPR, H1F0, H2AFJ, H2AFV, H2AFX, H2AFY2, H2AFZ, HAT1, HDAC1, HELLS, HIST1H1B, HIST1H1C, HIST1H1D, HIST1H…
GO:0000786	nucleosome	GO_CellularComponent-EBI-UniProt-GOA_24.08.2018_00h00	1.94965e-26	1.86609e-25	1.3334e-55	1.66675e-54	[3, 4, 5, 6, 7, 8, 9, 10]	Group19	52.2124	59	[CENPA, H1F0, H2AFJ, H2AFV, H2AFX, H2AFY2, H2AFZ, HIST1H1B, HIST1H1C, HIST1H1D, HIST1H1E, HIST1H2AB, HIST1H2AC, HIST1H2AD, HIST1H2AE, HIST1H2AG, HIST1H2AH, HIST1H2AI, HIST1H2AJ, HIST1H2AK, HIST1H2AL, HIST1H2AM, HIST1H2BC, HIST1H2BD, HIST1H2BE, HIST1H2BF, HIST1H2BG, HIST1H2BH, HIST1H2BI, HIST1H2BJ, HIST1H2BK, HIST1H2BL, HIST1H2BM, HIST1H2BN, HIST1H2BO, HIST1H3A, HIST1H3B, HIST1H3D, HIST1H3E, HIST1…
GO:0098687	chromosomal region	GO_CellularComponent-EBI-UniProt-GOA_24.08.2018_00h00	1.14722e-33	1.9216e-32	1.3334e-55	1.66675e-54	[4, 5, 6, 7, 8, 9]	Group19	32.8054	145	[ALYREF, ANAPC16, ANTXR1, APEX1, AURKA, AURKB, BCL2L11, BIRC5, BLM, BLMH, BRCA2, BUB1, BUB1B, BUB3, CAPG, CBX5, CCNB1, CDCA5, CDCA8, CDK1, CDK2, CDT1, CENPA, CENPE, CENPF, CENPH, CENPI, CENPK, CENPL, CENPM, CENPN, CENPO, CENPQ, CENPU, CENPV, CENPW, CHEK1, CHEK2, CTDSP1, CTDSPL, DCLRE1A, DLEC1, DMC1, DNA2, DSCC1, DSN1, ERCC1, ESCO2, FANCD2, H2AFX, H2AFY2, HAT1, HELLS, HIST1H4A, HIST1H4B, HIST1H4C,…
GO:0000228	nuclear chromosome	GO_CellularComponent-EBI-UniProt-GOA_24.08.2018_00h00	6.48163e-35	1.24077e-33	1.3334e-55	1.66675e-54	[4, 5, 6, 7, 8, 9, 10]	Group19	27.628	205	[ACKR3, ADD3, ALYREF, ANP32E, ANTXR1, APEX1, APOBEC3C, APOBEC3F, ASF1A, ASF1B, AURKA, AURKB, BCL2L11, BEND3, BIRC5, BLM, BLMH, BRCA1, BRCA2, BUB1, BUB1B, C14orf39, CAD, CBX5, CCNB1, CCNB1IP1, CDC45, CDCA5, CDK1, CDKN3, CECR2, CENPA, CHAF1A, CHAF1B, CHEK1, CHRAC1, CSNK2A2, CTDSP1, CTDSP2, CTDSPL, CTNNB1, DCLRE1A, DDX11, DFFA, DMC1, DNA2, DSN1, E2F1, ELP4, EME1, ERCC1, ESCO2, ETAA1, EZH2, FANCD2, G…
GO:0044454	nuclear chromosome part	GO_CellularComponent-EBI-UniProt-GOA_24.08.2018_00h00	9.02547e-33	1.34379e-31	1.3334e-55	1.66675e-54	[4, 5, 6, 7, 8, 9, 10, 11]	Group19	27.6109	193	[ACKR3, ALYREF, ANP32E, ANTXR1, APEX1, APOBEC3C, APOBEC3F, ASF1A, ASF1B, AURKA, AURKB, BCL2L11, BEND3, BLM, BLMH, BRCA1, BRCA2, BUB1, BUB1B, C14orf39, CAD, CBX5, CCNB1, CCNB1IP1, CDC45, CDCA5, CDK1, CDKN3, CECR2, CENPA, CHAF1A, CHAF1B, CHRAC1, CSNK2A2, CTDSP1, CTDSP2, CTDSPL, CTNNB1, DCLRE1A, DDX11, DFFA, DNA2, DSN1, E2F1, ELP4, EME1, ERCC1, ESCO2, ETAA1, EZH2, FANCD2, GATAD2A, GINS1, GINS2, GINS…
GO:0000790	nuclear chromatin	GO_CellularComponent-EBI-UniProt-GOA_24.08.2018_00h00	3.95656e-16	1.71026e-15	1.3334e-55	1.66675e-54	[5, 6, 7, 8, 9, 10, 11, 12]	Group19	25.1685	112	[ACKR3, ANP32E, APOBEC3C, APOBEC3F, ASF1A, ASF1B, BEND3, CAD, CBX5, CDCA5, CDKN3, CECR2, CENPA, CHAF1A, CHAF1B, CHRAC1, CSNK2A2, CTNNB1, DDX11, DFFA, E2F1, ELP4, EME1, ESCO2, EZH2, GATAD2A, GLI3, H1F0, H2AFJ, H2AFV, H2AFX, H2AFY2, H2AFZ, HAT1, HDAC1, HIST1H1B, HIST1H1C, HIST1H1D, HIST1H1E, HIST1H2AB, HIST1H2AC, HIST1H2AD, HIST1H2AE, HIST1H2AG, HIST1H2AH, HIST1H2AI, HIST1H2AJ, HIST1H2AK, HIST1H2AL…
GO:0000785	chromatin	GO_CellularComponent-EBI-UniProt-GOA_24.08.2018_00h00	1.37262e-25	1.22621e-24	5.71596e-26	4.7633e-25	[4, 5, 6, 7, 8, 9]	Group24	25.9939	170	[ACKR3, ANP32E, APOBEC3C, APOBEC3F, ASF1A, ASF1B, BCL2L11, BEND3, BLMH, BRCA1, CAD, CAPN2, CBX2, CBX5, CCND2, CDCA5, CDK2, CDK4, CDKN3, CECR2, CENPA, CENPF, CHAF1A, CHAF1B, CHEK1, CHRAC1, CSNK2A2, CTNNB1, DDX11, DFFA, DSCC1, E2F1, EIF3E, ELP4, EME1, ESCO2, EZH2, FAM111A, FANK1, GATAD2A, GLI3, GRHPR, H1F0, H2AFJ, H2AFV, H2AFX, H2AFY2, H2AFZ, HAT1, HDAC1, HELLS, HIST1H1B, HIST1H1C, HIST1H1D, HIST1H…
GO:0000786	nucleosome	GO_CellularComponent-EBI-UniProt-GOA_24.08.2018_00h00	1.94965e-26	1.86609e-25	5.71596e-26	4.7633e-25	[3, 4, 5, 6, 7, 8, 9, 10]	Group24	52.2124	59	[CENPA, H1F0, H2AFJ, H2AFV, H2AFX, H2AFY2, H2AFZ, HIST1H1B, HIST1H1C, HIST1H1D, HIST1H1E, HIST1H2AB, HIST1H2AC, HIST1H2AD, HIST1H2AE, HIST1H2AG, HIST1H2AH, HIST1H2AI, HIST1H2AJ, HIST1H2AK, HIST1H2AL, HIST1H2AM, HIST1H2BC, HIST1H2BD, HIST1H2BE, HIST1H2BF, HIST1H2BG, HIST1H2BH, HIST1H2BI, HIST1H2BJ, HIST1H2BK, HIST1H2BL, HIST1H2BM, HIST1H2BN, HIST1H2BO, HIST1H3A, HIST1H3B, HIST1H3D, HIST1H3E, HIST1…
GO:0000788	nuclear nucleosome	GO_CellularComponent-EBI-UniProt-GOA_24.08.2018_00h00	4.99321e-11	1.48687e-10	5.71596e-26	4.7633e-25	[4, 5, 6, 7, 8, 9, 10, 11, 12, 13]	Group24	53.6585	22	[CENPA, HIST1H1E, HIST1H3A, HIST1H3B, HIST1H3D, HIST1H3E, HIST1H3F, HIST1H3G, HIST1H3H, HIST1H3I, HIST1H3J, HIST1H4A, HIST1H4B, HIST1H4C, HIST1H4D, HIST1H4E, HIST1H4F, HIST1H4H, HIST1H4I, HIST1H4J, HIST1H4L, HIST4H4]
GO:0000790	nuclear chromatin	GO_CellularComponent-EBI-UniProt-GOA_24.08.2018_00h00	3.95656e-16	1.71026e-15	5.71596e-26	4.7633e-25	[5, 6, 7, 8, 9, 10, 11, 12]	Group24	25.1685	112	[ACKR3, ANP32E, APOBEC3C, APOBEC3F, ASF1A, ASF1B, BEND3, CAD, CBX5, CDCA5, CDKN3, CECR2, CENPA, CHAF1A, CHAF1B, CHRAC1, CSNK2A2, CTNNB1, DDX11, DFFA, E2F1, ELP4, EME1, ESCO2, EZH2, GATAD2A, GLI3, H1F0, H2AFJ, H2AFV, H2AFX, H2AFY2, H2AFZ, HAT1, HDAC1, HIST1H1B, HIST1H1C, HIST1H1D, HIST1H1E, HIST1H2AB, HIST1H2AC, HIST1H2AD, HIST1H2AE, HIST1H2AG, HIST1H2AH, HIST1H2AI, HIST1H2AJ, HIST1H2AK, HIST1H2AL…
GO:0005657	replication fork	GO_CellularComponent-EBI-UniProt-GOA_24.08.2018_00h00	1.79196e-14	6.67007e-14	1.70679e-25	1.06675e-24	[4, 5, 6, 7, 8, 9]	Group22	45.122	37	[BLM, CDC45, CHEK1, ETAA1, GINS2, GINS4, H2AFX, HELB, MCM10, MCM3, MMS22L, NBN, NME1, PCNA, PIF1, POLA2, POLD1, POLD2, POLD3, PRIM2, PTN, PURB, RAD18, RAD51B, RFC1, RFC2, RFC3, RFC5, RPA1, RPA2, RPA3, TIPIN, TONSL, TP53, UHRF1, XRCC2, XRCC3]
GO:0043596	nuclear replication fork	GO_CellularComponent-EBI-UniProt-GOA_24.08.2018_00h00	2.52351e-08	5.04702e-08	1.70679e-25	1.06675e-24	[5, 6, 7, 8, 9, 10, 11, 12]	Group22	42.8571	21	[CDC45, ETAA1, GINS2, GINS4, HELB, MCM10, MCM3, MMS22L, PCNA, POLA2, POLD1, POLD2, POLD3, PRIM2, PTN, PURB, RPA1, RPA2, RPA3, TIPIN, TONSL]
GO:0005819	spindle	GO_CellularComponent-EBI-UniProt-GOA_24.08.2018_00h00	7.10336e-15	2.79956e-14	7.10336e-15	2.2198e-14	[4, 5, 6, 7, 8, 9]	Group09	24.8815	105	[ANXA11, ASPM, AURKA, AURKB, BCL2L11, BIRC5, BLMH, BUB1B, CAPG, CAPN6, CCNB1, CDC14A, CDC14B, CDC20, CDC6, CDC7, CDCA8, CDK1, CENPE, CENPF, CENPV, CEP162, CKAP2, CKAP2L, CTNNB1, DDX11, DEPDC1B, DLEC1, DLGAP5, DSN1, ECT2, ESPL1, FAM83D, FBF1, FBXO5, GPSM2, HASPIN, HAUS5, HAUS6, HAUS8, HNRNPK, HSPB1, INCENP, IQCB1, KATNAL2, KIF11, KIF14, KIF15, KIF18A, KIF18B, KIF20A, KIF20B, KIF22, KIF23, KIF4A, K…
GO:0000922	spindle pole	GO_CellularComponent-EBI-UniProt-GOA_24.08.2018_00h00	1.46265e-08	3.11103e-08	7.10336e-15	2.2198e-14	[4, 5, 6, 7, 8, 9, 10]	Group09	26.178	50	[ASPM, AURKA, AURKB, BCL2L11, BLMH, CCNB1, CDC14A, CDC14B, CDC20, CDC6, CENPF, CKAP2, CKAP2L, CTNNB1, DDX11, DEPDC1B, DLGAP5, DSN1, FAM83D, FBF1, GPSM2, HAUS8, HNRNPK, KATNAL2, KIF11, KIF20B, KNSTRN, KNTC1, MAD2L1, NDE1, NEDD1, NEDD9, NEK2, NEK6, NEK7, NPM1, PARP4, PLK1, POC1A, PRC1, PSRC1, RASSF10, SGO1, SMC1A, SPAG5, SPDL1, STAG2, TACC3, TPX2, ZNF367]
GO:0072686	mitotic spindle	GO_CellularComponent-EBI-UniProt-GOA_24.08.2018_00h00	5.45064e-09	1.25929e-08	7.10336e-15	2.2198e-14	[5, 6, 7, 8, 9, 10]	Group09	30.4688	39	[ASPM, AURKA, AURKB, BCL2L11, BLMH, CAPG, CDC14A, CDC14B, CDC7, CDK1, CENPE, CKAP2L, DLEC1, ECT2, ESPL1, FAM83D, GPSM2, IQCB1, KIF11, KIF18A, KIF20B, KIF22, KIF23, KNSTRN, MAD2L1, NCAPG, PARP4, POLD1, PRKD2, RCC2, RPS3, RTRAF, SMC1A, SPAG5, STAG2, TACC3, TPR, TPX2, ZNF367]
GO:0044391	ribosomal subunit	GO_CellularComponent-EBI-UniProt-GOA_24.08.2018_00h00	4.1344e-35	9.2335e-34	2.39572e-11	4.99108e-11	[3, 4, 5, 6, 7, 8]	Group23	43.8053	99	[BRIP1, MRPL11, MRPL12, MRPL15, MRPL37, MRPL45, MRPL51, MRPL53, MRPL58, MRPS15, MRPS18A, MRPS27, MRPS28, MRPS7, MRPS9, RACK1, RBM3, RPL10, RPL10A, RPL11, RPL12, RPL13, RPL13A, RPL14, RPL15, RPL17, RPL18, RPL18A, RPL19, RPL21, RPL22, RPL22L1, RPL23, RPL23A, RPL24, RPL26, RPL27, RPL27A, RPL28, RPL29, RPL3, RPL30, RPL31, RPL32, RPL34, RPL35, RPL35A, RPL36, RPL36A, RPL37, RPL37A, RPL38, RPL39, RPL39L…
GO:0044445	cytosolic part	GO_CellularComponent-EBI-UniProt-GOA_24.08.2018_00h00	1.48282e-21	9.93487e-21	2.39572e-11	4.99108e-11	[4, 5, 6, 7, 8]	Group23	30.7229	102	[AP3B1, BLOC1S1, C3orf58, CCT3, DAG1, ENAH, ENO1, ENO3, FAM96A, FXN, GSDMD, HPS1, LRP5, MRPS18A, PFKM, RALBP1, RPL10, RPL10A, RPL11, RPL12, RPL13, RPL13A, RPL14, RPL15, RPL17, RPL18, RPL18A, RPL19, RPL21, RPL22, RPL22L1, RPL23, RPL23A, RPL24, RPL26, RPL27, RPL27A, RPL28, RPL29, RPL3, RPL30, RPL31, RPL32, RPL34, RPL35, RPL35A, RPL36, RPL36A, RPL37, RPL37A, RPL38, RPL39, RPL39L, RPL4, RPL41, RPL5, …
GO:0015934	large ribosomal subunit	GO_CellularComponent-EBI-UniProt-GOA_24.08.2018_00h00	8.89075e-22	6.61867e-21	2.39572e-11	4.99108e-11	[4, 5, 6, 7, 8, 9]	Group23	43.7956	60	[BRIP1, MRPL11, MRPL12, MRPL15, MRPL37, MRPL45, MRPL51, MRPL53, MRPL58, MRPS18A, RBM3, RPL10, RPL10A, RPL11, RPL12, RPL13, RPL13A, RPL14, RPL15, RPL17, RPL18, RPL18A, RPL19, RPL21, RPL22, RPL22L1, RPL23, RPL23A, RPL24, RPL26, RPL27, RPL27A, RPL28, RPL29, RPL3, RPL30, RPL31, RPL32, RPL34, RPL35, RPL35A, RPL36, RPL36A, RPL37, RPL37A, RPL38, RPL39, RPL39L, RPL4, RPL41, RPL5, RPL6, RPL7, RPL7A, RPL8,…
GO:0015935	small ribosomal subunit	GO_CellularComponent-EBI-UniProt-GOA_24.08.2018_00h00	4.7094e-15	1.9123e-14	2.39572e-11	4.99108e-11	[4, 5, 6, 7, 8, 9]	Group23	43.956	40	[MRPS15, MRPS18A, MRPS27, MRPS28, MRPS7, MRPS9, RACK1, RPS10, RPS11, RPS12, RPS13, RPS14, RPS15, RPS15A, RPS16, RPS17, RPS18, RPS19, RPS2, RPS20, RPS21, RPS23, RPS24, RPS25, RPS26, RPS27, RPS27A, RPS27L, RPS28, RPS3, RPS3A, RPS4X, RPS5, RPS6, RPS7, RPS8, RPS9, RPSA, SLC16A1, TTK]
GO:0022626	cytosolic ribosome	GO_CellularComponent-EBI-UniProt-GOA_24.08.2018_00h00	1.02504e-39	3.43387e-38	2.39572e-11	4.99108e-11	[4, 5, 6, 7, 8, 9]	Group23	56.5517	82	[MRPS18A, RPL10, RPL10A, RPL11, RPL12, RPL13, RPL13A, RPL14, RPL15, RPL17, RPL18, RPL18A, RPL19, RPL21, RPL22, RPL22L1, RPL23, RPL23A, RPL24, RPL26, RPL27, RPL27A, RPL28, RPL29, RPL3, RPL30, RPL31, RPL32, RPL34, RPL35, RPL35A, RPL36, RPL36A, RPL37, RPL37A, RPL38, RPL39, RPL39L, RPL4, RPL41, RPL5, RPL6, RPL7, RPL7A, RPL8, RPL9, RPLP0, RPLP1, RPLP2, RPS10, RPS11, RPS12, RPS13, RPS14, RPS15, RPS15A,…
GO:0022625	cytosolic large ribosomal subunit	GO_CellularComponent-EBI-UniProt-GOA_24.08.2018_00h00	5.41256e-28	6.59349e-27	2.39572e-11	4.99108e-11	[5, 6, 7, 8, 9, 10]	Group23	65.7534	48	[RPL10, RPL10A, RPL11, RPL12, RPL13, RPL13A, RPL14, RPL15, RPL17, RPL18, RPL18A, RPL19, RPL21, RPL22, RPL22L1, RPL23, RPL23A, RPL24, RPL26, RPL27, RPL27A, RPL28, RPL29, RPL3, RPL30, RPL31, RPL32, RPL34, RPL35, RPL35A, RPL36, RPL36A, RPL37, RPL37A, RPL38, RPL39, RPL39L, RPL4, RPL41, RPL5, RPL6, RPL7, RPL7A, RPL8, RPL9, RPLP0, RPLP1, RPLP2]
GO:0022627	cytosolic small ribosomal subunit	GO_CellularComponent-EBI-UniProt-GOA_24.08.2018_00h00	2.10992e-16	9.74927e-16	2.39572e-11	4.99108e-11	[5, 6, 7, 8, 9, 10]	Group23	53.9683	34	[MRPS18A, RPS10, RPS11, RPS12, RPS13, RPS14, RPS15, RPS15A, RPS16, RPS17, RPS18, RPS19, RPS2, RPS20, RPS21, RPS23, RPS24, RPS25, RPS26, RPS27, RPS27A, RPS27L, RPS28, RPS3, RPS3A, RPS4X, RPS5, RPS6, RPS7, RPS8, RPS9, RPSA, SLC16A1, TTK]
GO:0000788	nuclear nucleosome	GO_CellularComponent-EBI-UniProt-GOA_24.08.2018_00h00	4.99321e-11	1.48687e-10	1.71993e-07	1.95446e-07	[4, 5, 6, 7, 8, 9, 10, 11, 12, 13]	Group13	53.6585	22	[CENPA, HIST1H1E, HIST1H3A, HIST1H3B, HIST1H3D, HIST1H3E, HIST1H3F, HIST1H3G, HIST1H3H, HIST1H3I, HIST1H3J, HIST1H4A, HIST1H4B, HIST1H4C, HIST1H4D, HIST1H4E, HIST1H4F, HIST1H4H, HIST1H4I, HIST1H4J, HIST1H4L, HIST4H4]
GO:0000792	heterochromatin	GO_CellularComponent-EBI-UniProt-GOA_24.08.2018_00h00	5.56682e-05	6.97153e-05	5.56682e-05	5.56682e-05	[5, 6, 7, 8, 9, 10]	Group03	25.7426	26	[BEND3, CBX2, CBX5, CDK2, CDKN3, CENPA, EME1, ESCO2, GRHPR, H2AFZ, HDAC1, HELLS, HIST1H1B, HIST1H1E, HMGA1, HMGA2, IKZF1, INCENP, NOP53, RAD54L, SALL1, SALL4, SUV39H1, TRIM28, UHRF1, WDR76]
